# Supplementary material for: Dutrowite, Na(Fe2+2.5Ti0.5)Al6(Si6O18)(BO3)3(OH)3O, a new mineral from the Apuan Alps (Tuscany, Italy): the first member of the tourmaline supergroup with Ti as a species-forming chemical constituent
Source: Copernicus journal article supplement (doi:10.5194/ejm-35-81-2023), 2023-02-10
Supplement: Supplementary file 1 [file ejm-35-81-2023-supplement.zip]

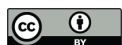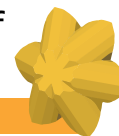

*Supplement of*

**Dutrowite,  $\text{Na}(\text{Fe}_{2.5}^{2+}\text{Ti}_{0.5})\text{Al}_6(\text{Si}_6\text{O}_{18})(\text{BO}_3)_3(\text{OH})_3\text{O}$ , a new mineral from the Apuan Alps (Tuscany, Italy): the first member of the tourmaline supergroup with Ti as a species-forming chemical constituent**

Cristian Biagioni et al.

*Correspondence to:* Cristian Biagioni ([cristian.biagioni@unipi.it](mailto:cristian.biagioni@unipi.it))

- [ejm-35-81-2023-supplement-title-page.pdf](#)
- [additional chemical data.pdf](#)
- [additional chemical data.xlsx](#)
- [dutrowite.cif](#)

The copyright of individual parts of the supplement might differ from the article licence.
