# Supplementary material for: Dutrowite, Na(Fe2+2.5Ti0.5)Al6(Si6O18)(BO3)3(OH)3O, a new mineral from the Apuan Alps (Tuscany, Italy): the first member of the tourmaline supergroup with Ti as a species-forming chemical constituent
Source: Copernicus journal article supplement (doi:10.5194/ejm-35-81-2023), 2023-02-10
Supplement: Supplementary file 2 [file ejm-35-81-2023-supplement.zip]

Archive with 4 entries (4 files):
- additional chemical data.pdf
- additional chemical data.xlsx
- dutrowite.cif
- ejm-35-81-2023-supplement-title-page.pdf
