# Supplementary material for: Dutrowite, Na(Fe2+2.5Ti0.5)Al6(Si6O18)(BO3)3(OH)3O, a new mineral from the Apuan Alps (Tuscany, Italy): the first member of the tourmaline supergroup with Ti as a species-forming chemical constituent
Source: Copernicus journal article supplement (doi:10.5194/ejm-35-81-2023), 2023-02-10
Supplement: Supplementary file 2 [file ejm-35-81-2023-supplement.zip › additional chemical data.pdf]

Supplementary material: electron microprobe data collected on type material of dutrowite, and representative of both dutrowite and associated Fe-rich oxy-dravite.

| No. | Na <sub>2</sub> O | SiO <sub>2</sub> | CaO  | FeO   | Fe <sub>2</sub> O <sub>3</sub> | MnO  | MgO  | K <sub>2</sub> O | TiO <sub>2</sub> | SrO  | Al <sub>2</sub> O <sub>3</sub> | V <sub>2</sub> O <sub>3</sub> | Totale |
|-----|-------------------|------------------|------|-------|--------------------------------|------|------|------------------|------------------|------|--------------------------------|-------------------------------|--------|
| 2   | 2.51              | 34.33            | 1.15 | 10.44 | 2.21                           | 0.04 | 6.36 | 0.05             | 4.37             | 0.07 | 26.50                          | 0.16                          | 88.21  |
| 3   | 2.34              | 34.77            | 1.29 | 10.19 | 2.16                           | 0.04 | 6.48 | 0.06             | 4.99             | 0.00 | 25.83                          | 0.18                          | 88.33  |
| 4   | 2.26              | 34.61            | 1.51 | 9.92  | 2.10                           | 0.02 | 6.52 | 0.06             | 4.31             | 0.10 | 26.37                          | 0.19                          | 87.97  |
| 5   | 2.43              | 34.74            | 0.88 | 9.39  | 1.99                           | 0.02 | 6.08 | 0.05             | 2.78             | 0.00 | 28.69                          | 0.14                          | 87.20  |
| 6   | 2.53              | 34.64            | 1.11 | 10.63 | 2.25                           | 0.02 | 6.31 | 0.06             | 4.80             | 0.00 | 26.07                          | 0.17                          | 88.58  |
| 7   | 2.41              | 33.86            | 1.19 | 10.43 | 2.21                           | 0.05 | 6.23 | 0.06             | 5.01             | 0.00 | 25.71                          | 0.18                          | 87.34  |
| 8   | 2.71              | 34.38            | 0.76 | 9.70  | 2.05                           | 0.01 | 6.26 | 0.05             | 4.04             | 0.00 | 28.02                          | 0.21                          | 88.19  |
| 9   | 2.54              | 34.20            | 1.12 | 9.97  | 2.11                           | 0.02 | 6.40 | 0.07             | 4.06             | 0.00 | 26.74                          | 0.17                          | 87.40  |
| 10  | 2.51              | 33.91            | 1.13 | 10.32 | 2.18                           | 0.02 | 6.31 | 0.07             | 5.01             | 0.00 | 25.64                          | 0.18                          | 87.28  |
| 11  | 2.47              | 34.37            | 0.79 | 9.39  | 1.99                           | 0.04 | 6.16 | 0.05             | 3.38             | 0.00 | 28.51                          | 0.12                          | 87.25  |
| 12  | 2.86              | 34.35            | 0.93 | 10.25 | 2.17                           | 0.03 | 6.42 | 0.04             | 3.41             | 0.00 | 29.19                          | 0.12                          | 89.76  |
| 13  | 2.43              | 34.27            | 1.12 | 10.79 | 2.28                           | 0.03 | 5.79 | 0.07             | 5.65             | 0.00 | 24.69                          | 0.22                          | 87.34  |
| 14  | 2.60              | 34.89            | 0.96 | 9.99  | 2.12                           | 0.01 | 5.92 | 0.04             | 3.12             | 0.04 | 27.49                          | 0.12                          | 87.29  |
| 15  | 2.40              | 35.11            | 1.23 | 9.15  | 1.94                           | 0.04 | 6.66 | 0.04             | 2.25             | 0.00 | 28.72                          | 0.24                          | 87.76  |
| 16  | 2.43              | 34.93            | 1.17 | 9.34  | 1.98                           | 0.03 | 6.73 | 0.04             | 2.56             | 0.00 | 28.39                          | 0.19                          | 87.78  |
| 17  | 2.47              | 35.03            | 1.01 | 9.38  | 1.98                           | 0.02 | 6.75 | 0.04             | 2.72             | 0.07 | 28.37                          | 0.13                          | 87.99  |
| 18  | 2.41              | 34.62            | 1.09 | 8.96  | 1.90                           | 0.02 | 6.76 | 0.04             | 2.77             | 0.00 | 28.37                          | 0.17                          | 87.10  |
| 19  | 2.52              | 34.50            | 0.99 | 9.47  | 2.00                           | 0.04 | 6.52 | 0.05             | 2.63             | 0.00 | 28.29                          | 0.17                          | 87.17  |
| 20  | 2.50              | 35.60            | 0.96 | 9.52  | 2.01                           | 0.02 | 6.51 | 0.03             | 2.73             | 0.03 | 27.90                          | 0.20                          | 88.00  |
| 21  | 2.41              | 34.38            | 1.04 | 9.15  | 1.94                           | 0.03 | 6.48 | 0.04             | 2.71             | 0.01 | 28.43                          | 0.15                          | 86.76  |
| 22  | 2.37              | 35.07            | 1.18 | 9.30  | 1.97                           | 0.06 | 6.78 | 0.05             | 2.75             | 0.00 | 27.99                          | 0.17                          | 87.69  |
| 23  | 2.50              | 35.14            | 1.10 | 9.31  | 1.97                           | 0.04 | 6.63 | 0.02             | 2.74             | 0.03 | 28.48                          | 0.21                          | 88.18  |
| 24  | 2.46              | 34.37            | 1.06 | 9.54  | 2.02                           | 0.05 | 6.45 | 0.05             | 2.61             | 0.00 | 28.51                          | 0.13                          | 87.24  |
| 25  | 2.48              | 35.27            | 1.06 | 9.44  | 2.00                           | 0.03 | 6.30 | 0.03             | 2.58             | 0.00 | 28.31                          | 0.13                          | 87.63  |
| 26  | 2.57              | 34.88            | 0.77 | 10.06 | 2.13                           | 0.02 | 6.08 | 0.04             | 2.52             | 0.00 | 28.19                          | 0.05                          | 87.29  |
| 27  | 2.44              | 34.74            | 1.09 | 9.70  | 2.05                           | 0.01 | 6.58 | 0.02             | 2.88             | 0.00 | 28.48                          | 0.22                          | 88.21  |
| 28  | 2.50              | 35.30            | 0.96 | 9.35  | 1.98                           | 0.06 | 6.40 | 0.04             | 2.77             | 0.00 | 28.70                          | 0.12                          | 88.18  |
| 29  | 2.50              | 35.09            | 0.97 | 9.76  | 2.07                           | 0.05 | 6.20 | 0.04             | 3.25             | 0.00 | 28.01                          | 0.12                          | 88.05  |
| 30  | 2.59              | 34.46            | 0.96 | 9.99  | 2.11                           | 0.02 | 6.25 | 0.06             | 3.45             | 0.00 | 28.20                          | 0.17                          | 88.26  |
| 31  | 2.38              | 34.67            | 0.99 | 9.66  | 2.05                           | 0.03 | 6.17 | 0.02             | 3.95             | 0.05 | 27.75                          | 0.09                          | 87.80  |
| 34  | 2.53              | 34.42            | 1.03 | 9.89  | 2.09                           | 0.03 | 6.22 | 0.02             | 3.98             | 0.01 | 27.39                          | 0.10                          | 87.70  |
| 35  | 2.44              | 34.93            | 0.99 | 9.79  | 2.07                           | 0.02 | 6.20 | 0.05             | 3.58             | 0.00 | 27.69                          | 0.15                          | 87.91  |
| 36  | 2.68              | 34.54            | 1.06 | 10.18 | 2.15                           | 0.01 | 6.38 | 0.02             | 3.80             | 0.00 | 27.31                          | 0.12                          | 88.25  |
| 37  | 2.26              | 34.33            | 1.47 | 10.25 | 2.17                           | 0.00 | 6.39 | 0.05             | 4.42             | 0.01 | 26.11                          | 0.13                          | 87.58  |
| 38  | 2.31              | 34.24            | 1.50 | 10.07 | 2.13                           | 0.02 | 6.62 | 0.06             | 4.51             | 0.00 | 26.70                          | 0.16                          | 88.32  |
| 39  | 2.95              | 34.35            | 0.26 | 11.61 | 2.46                           | 0.00 | 5.56 | 0.04             | 3.03             | 0.10 | 28.08                          | 0.01                          | 88.46  |
| 40  | 2.33              | 34.21            | 1.54 | 10.22 | 2.16                           | 0.03 | 6.67 | 0.05             | 3.75             | 0.00 | 26.94                          | 0.16                          | 88.07  |
| 41  | 2.29              | 33.82            | 1.35 | 9.85  | 2.08                           | 0.02 | 6.35 | 0.05             | 3.64             | 0.04 | 27.31                          | 0.09                          | 86.88  |
| 42  | 2.21              | 33.92            | 1.62 | 10.05 | 2.13                           | 0.02 | 6.38 | 0.04             | 4.52             | 0.00 | 26.48                          | 0.12                          | 87.49  |
| 43  | 2.14              | 34.68            | 1.54 | 9.74  | 2.06                           | 0.02 | 6.39 | 0.03             | 3.13             | 0.00 | 28.28                          | 0.20                          | 88.22  |
| 44  | 2.35              | 33.98            | 1.41 | 10.33 | 2.19                           | 0.00 | 6.48 | 0.05             | 3.88             | 0.00 | 26.92                          | 0.12                          | 87.71  |
| 45  | 2.46              | 33.86            | 1.09 | 9.79  | 2.07                           | 0.02 | 6.12 | 0.05             | 3.47             | 0.00 | 27.37                          | 0.16                          | 86.45  |
| 46  | 2.49              | 34.40            | 1.05 | 10.29 | 2.18                           | 0.03 | 6.21 | 0.05             | 4.36             | 0.00 | 26.54                          | 0.14                          | 87.73  |
| 47  | 2.46              | 34.29            | 1.12 | 10.49 | 2.22                           | 0.01 | 6.20 | 0.05             | 4.85             | 0.02 | 26.22                          | 0.22                          | 88.14  |
| 48  | 2.31              | 35.04            | 1.26 | 9.26  | 1.96                           | 0.03 | 6.82 | 0.03             | 3.06             | 0.01 | 27.97                          | 0.18                          | 87.92  |

|     |      |       |      |       |      |      |      |      |      |      |       |      |       |
|-----|------|-------|------|-------|------|------|------|------|------|------|-------|------|-------|
| 49  | 2.16 | 35.06 | 1.10 | 9.12  | 1.93 | 0.02 | 6.17 | 0.07 | 2.47 | 0.00 | 27.05 | 0.11 | 85.26 |
| 50  | 2.40 | 33.62 | 1.04 | 9.35  | 1.98 | 0.04 | 6.11 | 0.06 | 2.45 | 0.00 | 28.28 | 0.09 | 85.41 |
| 51  | 2.38 | 34.79 | 1.33 | 9.60  | 2.03 | 0.05 | 6.06 | 0.05 | 3.15 | 0.10 | 26.34 | 0.20 | 86.07 |
| 52  | 2.34 | 34.31 | 1.33 | 9.59  | 2.03 | 0.08 | 6.53 | 0.05 | 2.95 | 0.00 | 28.17 | 0.09 | 87.45 |
| 54  | 2.08 | 34.08 | 1.60 | 9.86  | 2.09 | 0.01 | 6.38 | 0.03 | 4.64 | 0.00 | 25.81 | 0.09 | 86.67 |
| 56  | 2.20 | 34.82 | 1.37 | 9.57  | 2.03 | 0.01 | 6.38 | 0.03 | 3.71 | 0.00 | 27.19 | 0.09 | 87.40 |
| 57  | 2.43 | 34.17 | 1.10 | 9.18  | 1.94 | 0.02 | 6.35 | 0.04 | 2.50 | 0.00 | 28.90 | 0.05 | 86.69 |
| 58  | 2.37 | 34.82 | 0.84 | 9.38  | 1.99 | 0.01 | 5.98 | 0.05 | 3.30 | 0.05 | 28.77 | 0.10 | 87.66 |
| 59  | 2.41 | 34.39 | 0.83 | 9.48  | 2.01 | 0.00 | 5.95 | 0.02 | 3.68 | 0.00 | 27.68 | 0.10 | 86.54 |
| 60  | 2.40 | 34.31 | 0.68 | 9.93  | 2.10 | 0.02 | 5.61 | 0.02 | 2.70 | 0.09 | 28.68 | 0.09 | 86.62 |
| 61  | 2.58 | 34.45 | 0.86 | 9.28  | 1.96 | 0.04 | 6.31 | 0.07 | 4.55 | 0.00 | 28.42 | 0.14 | 88.65 |
| 62  | 2.16 | 35.67 | 1.42 | 10.07 | 2.13 | 0.01 | 6.13 | 0.07 | 3.79 | 0.01 | 26.71 | 0.11 | 88.28 |
| 63  | 2.28 | 34.36 | 1.44 | 10.28 | 2.18 | 0.03 | 6.24 | 0.06 | 5.29 | 0.00 | 25.99 | 0.15 | 88.29 |
| 64  | 2.63 | 34.38 | 1.03 | 10.17 | 2.15 | 0.03 | 6.14 | 0.05 | 5.54 | 0.00 | 25.60 | 0.15 | 87.85 |
| 65  | 2.51 | 34.40 | 0.85 | 9.81  | 2.08 | 0.02 | 6.02 | 0.04 | 3.55 | 0.02 | 27.72 | 0.19 | 87.20 |
| 66  | 2.60 | 34.23 | 1.10 | 10.67 | 2.26 | 0.05 | 6.08 | 0.04 | 4.57 | 0.00 | 26.29 | 0.15 | 88.04 |
| 67  | 2.49 | 34.99 | 1.15 | 10.11 | 2.14 | 0.06 | 6.13 | 0.06 | 2.47 | 0.06 | 28.02 | 0.06 | 87.74 |
| 68  | 2.47 | 35.25 | 0.94 | 9.38  | 1.98 | 0.04 | 6.08 | 0.05 | 2.30 | 0.00 | 28.93 | 0.07 | 87.49 |
| 70  | 2.34 | 34.32 | 1.14 | 9.19  | 1.95 | 0.05 | 5.92 | 0.03 | 2.65 | 0.00 | 29.01 | 0.07 | 86.66 |
| 76  | 2.27 | 34.57 | 1.00 | 8.76  | 1.85 | 0.03 | 6.26 | 0.03 | 2.94 | 0.00 | 30.66 | 0.12 | 88.49 |
| 78  | 2.63 | 34.40 | 1.26 | 9.37  | 1.98 | 0.02 | 6.81 | 0.03 | 2.91 | 0.00 | 29.02 | 0.13 | 88.56 |
| 79  | 2.37 | 34.33 | 1.11 | 9.40  | 1.99 | 0.02 | 6.56 | 0.05 | 2.64 | 0.00 | 27.79 | 0.23 | 86.50 |
| 80  | 2.51 | 34.96 | 1.06 | 9.08  | 1.92 | 0.03 | 6.58 | 0.04 | 2.75 | 0.00 | 28.44 | 0.15 | 87.51 |
| 81  | 2.52 | 34.99 | 1.07 | 9.15  | 1.94 | 0.04 | 6.50 | 0.01 | 2.98 | 0.00 | 28.30 | 0.13 | 87.62 |
| 82  | 2.46 | 35.08 | 1.28 | 9.36  | 1.98 | 0.06 | 6.68 | 0.04 | 2.45 | 0.01 | 28.32 | 0.12 | 87.84 |
| 83  | 2.46 | 34.53 | 1.21 | 9.12  | 1.93 | 0.00 | 6.77 | 0.04 | 2.79 | 0.00 | 27.85 | 0.14 | 86.83 |
| 84  | 2.51 | 35.10 | 0.89 | 9.66  | 2.05 | 0.00 | 6.29 | 0.03 | 2.45 | 0.00 | 28.67 | 0.13 | 87.78 |
| 85  | 2.50 | 34.91 | 1.00 | 9.53  | 2.02 | 0.04 | 6.43 | 0.04 | 2.77 | 0.00 | 28.31 | 0.10 | 87.65 |
| 86  | 2.50 | 35.15 | 1.08 | 9.27  | 1.96 | 0.01 | 6.49 | 0.02 | 2.90 | 0.00 | 27.80 | 0.13 | 87.31 |
| 87  | 2.50 | 35.18 | 0.87 | 9.50  | 2.01 | 0.05 | 6.40 | 0.03 | 2.50 | 0.00 | 27.91 | 0.20 | 87.15 |
| 88  | 2.57 | 34.88 | 1.05 | 9.60  | 2.03 | 0.04 | 6.44 | 0.03 | 2.71 | 0.04 | 28.72 | 0.04 | 88.14 |
| 89  | 2.57 | 34.87 | 1.12 | 9.77  | 2.07 | 0.01 | 6.59 | 0.04 | 2.95 | 0.00 | 28.04 | 0.24 | 88.25 |
| 91  | 2.51 | 35.02 | 0.95 | 9.56  | 2.02 | 0.03 | 6.27 | 0.06 | 2.70 | 0.00 | 28.29 | 0.11 | 87.52 |
| 92  | 2.57 | 35.13 | 0.97 | 9.76  | 2.07 | 0.03 | 6.24 | 0.04 | 2.66 | 0.00 | 28.21 | 0.12 | 87.80 |
| 93  | 2.54 | 35.54 | 1.00 | 9.70  | 2.05 | 0.05 | 6.46 | 0.04 | 2.61 | 0.00 | 28.14 | 0.15 | 88.29 |
| 94  | 2.51 | 35.21 | 1.01 | 10.02 | 2.12 | 0.02 | 6.24 | 0.04 | 2.49 | 0.00 | 28.78 | 0.11 | 88.54 |
| 95  | 2.55 | 35.02 | 1.04 | 9.80  | 2.07 | 0.01 | 6.35 | 0.05 | 2.89 | 0.00 | 27.97 | 0.05 | 87.80 |
| 96  | 2.44 | 34.69 | 0.84 | 9.70  | 2.05 | 0.06 | 6.10 | 0.02 | 2.35 | 0.00 | 28.67 | 0.07 | 87.00 |
| 97  | 2.51 | 34.85 | 0.89 | 9.96  | 2.11 | 0.04 | 6.05 | 0.06 | 2.67 | 0.00 | 28.54 | 0.07 | 87.74 |
| 98  | 2.43 | 34.89 | 1.01 | 9.90  | 2.10 | 0.05 | 6.17 | 0.03 | 2.73 | 0.00 | 28.28 | 0.09 | 87.67 |
| 99  | 2.46 | 34.55 | 1.15 | 9.84  | 2.08 | 0.04 | 6.39 | 0.05 | 2.77 | 0.01 | 27.86 | 0.15 | 87.33 |
| 100 | 2.43 | 35.23 | 1.09 | 9.71  | 2.06 | 0.01 | 6.65 | 0.11 | 2.98 | 0.04 | 27.75 | 0.18 | 88.23 |
| 101 | 2.37 | 35.59 | 1.13 | 9.63  | 2.04 | 0.00 | 6.70 | 0.08 | 3.59 | 0.00 | 27.17 | 0.20 | 88.49 |
| 102 | 2.52 | 34.55 | 1.10 | 10.10 | 2.14 | 0.02 | 6.22 | 0.06 | 4.97 | 0.00 | 25.94 | 0.19 | 87.81 |
| 103 | 2.65 | 35.00 | 0.58 | 10.18 | 2.16 | 0.04 | 5.85 | 0.24 | 2.80 | 0.00 | 27.77 | 0.06 | 87.32 |
| 104 | 2.47 | 34.14 | 1.24 | 10.64 | 2.25 | 0.04 | 6.17 | 0.06 | 4.92 | 0.00 | 25.58 | 0.11 | 87.63 |
| 105 | 2.55 | 34.16 | 1.04 | 10.14 | 2.15 | 0.06 | 6.09 | 0.06 | 3.79 | 0.00 | 26.74 | 0.13 | 86.92 |
| 106 | 2.39 | 34.60 | 0.97 | 9.91  | 2.10 | 0.06 | 6.31 | 0.02 | 2.22 | 0.00 | 28.28 | 0.05 | 86.90 |
| 107 | 2.34 | 34.88 | 1.24 | 10.07 | 2.13 | 0.08 | 6.33 | 0.02 | 2.16 | 0.02 | 27.98 | 0.05 | 87.29 |

|     |      |       |      |       |      |      |      |      |      |      |       |      |       |
|-----|------|-------|------|-------|------|------|------|------|------|------|-------|------|-------|
| 108 | 2.37 | 35.37 | 1.28 | 10.64 | 2.25 | 0.04 | 6.10 | 0.05 | 2.71 | 0.00 | 27.29 | 0.05 | 88.16 |
| 109 | 2.36 | 33.82 | 1.44 | 10.73 | 2.27 | 0.04 | 6.46 | 0.05 | 3.89 | 0.00 | 26.21 | 0.09 | 87.37 |
| 110 | 2.38 | 35.30 | 0.70 | 10.07 | 2.13 | 0.05 | 5.65 | 0.67 | 2.65 | 0.01 | 26.81 | 0.09 | 86.49 |
| 111 | 2.08 | 31.71 | 1.48 | 9.63  | 2.04 | 0.03 | 6.00 | 0.04 | 2.78 | 0.00 | 26.82 | 0.14 | 82.72 |
| 112 | 2.35 | 34.42 | 1.09 | 9.60  | 2.03 | 0.05 | 6.04 | 0.04 | 2.18 | 0.00 | 28.52 | 0.08 | 86.41 |
| 116 | 2.47 | 35.49 | 0.92 | 8.33  | 1.76 | 0.06 | 6.04 | 0.06 | 1.02 | 0.01 | 31.27 | 0.00 | 87.42 |
| 117 | 2.50 | 35.50 | 1.21 | 9.97  | 2.11 | 0.05 | 6.08 | 0.02 | 0.80 | 0.00 | 29.95 | 0.00 | 88.17 |
| 119 | 2.33 | 36.86 | 0.67 | 9.61  | 2.03 | 0.04 | 5.62 | 0.22 | 1.34 | 0.05 | 29.21 | 0.04 | 88.01 |
| 120 | 2.72 | 34.37 | 0.99 | 10.11 | 2.14 | 0.05 | 6.24 | 0.20 | 1.00 | 0.06 | 30.84 | 0.00 | 88.71 |
| 121 | 2.22 | 34.73 | 1.32 | 9.59  | 2.03 | 0.06 | 6.10 | 0.04 | 0.85 | 0.00 | 30.03 | 0.01 | 86.97 |
| 122 | 2.24 | 35.29 | 1.08 | 9.19  | 1.95 | 0.02 | 5.96 | 0.03 | 0.62 | 0.06 | 30.86 | 0.00 | 87.29 |
| 123 | 2.12 | 35.04 | 1.65 | 10.38 | 2.20 | 0.08 | 5.93 | 0.04 | 0.71 | 0.02 | 29.08 | 0.04 | 87.29 |
| 124 | 2.28 | 35.58 | 1.02 | 9.07  | 1.92 | 0.07 | 5.95 | 0.28 | 0.60 | 0.01 | 30.35 | 0.00 | 87.14 |
| 125 | 2.37 | 35.44 | 1.16 | 8.71  | 1.84 | 0.03 | 6.01 | 0.02 | 0.65 | 0.00 | 30.85 | 0.01 | 87.10 |
| 127 | 2.18 | 35.50 | 1.25 | 8.76  | 1.86 | 0.08 | 5.95 | 0.02 | 0.56 | 0.00 | 30.67 | 0.01 | 86.84 |
| 128 | 2.21 | 34.90 | 1.01 | 8.19  | 1.73 | 0.02 | 6.02 | 0.04 | 0.38 | 0.00 | 31.91 | 0.00 | 86.41 |
| 130 | 2.10 | 35.19 | 1.42 | 9.05  | 1.92 | 0.04 | 6.21 | 0.02 | 0.70 | 0.00 | 30.15 | 0.05 | 86.85 |
| 131 | 2.26 | 34.86 | 1.35 | 9.14  | 1.93 | 0.05 | 6.21 | 0.03 | 0.63 | 0.00 | 30.58 | 0.02 | 87.08 |
| 132 | 2.12 | 34.52 | 1.31 | 9.13  | 1.93 | 0.04 | 5.99 | 0.02 | 0.57 | 0.02 | 30.78 | 0.00 | 86.43 |
| 133 | 2.14 | 34.78 | 1.32 | 9.27  | 1.96 | 0.04 | 5.90 | 0.02 | 0.37 | 0.00 | 31.48 | 0.00 | 87.28 |
| 134 | 2.15 | 34.71 | 1.34 | 9.16  | 1.94 | 0.04 | 6.00 | 0.02 | 0.50 | 0.00 | 31.87 | 0.05 | 87.79 |
| 137 | 2.48 | 35.09 | 0.86 | 8.19  | 1.73 | 0.02 | 5.85 | 0.05 | 0.26 | 0.00 | 33.27 | 0.04 | 87.85 |
| 138 | 2.09 | 35.64 | 0.88 | 8.05  | 1.70 | 0.00 | 5.46 | 0.02 | 0.15 | 0.00 | 33.11 | 0.04 | 87.14 |
| 139 | 2.14 | 35.29 | 0.98 | 8.16  | 1.73 | 0.02 | 5.45 | 0.02 | 0.25 | 0.00 | 32.91 | 0.04 | 86.98 |
| 140 | 1.97 | 36.25 | 0.81 | 8.04  | 1.70 | 0.01 | 4.96 | 0.04 | 0.15 | 0.00 | 32.89 | 0.00 | 86.81 |
| 141 | 2.10 | 35.34 | 0.80 | 8.07  | 1.71 | 0.03 | 4.92 | 0.02 | 0.13 | 0.00 | 33.43 | 0.05 | 86.59 |
| 142 | 1.93 | 34.99 | 1.11 | 8.46  | 1.79 | 0.04 | 5.59 | 0.03 | 0.28 | 0.00 | 32.04 | 0.00 | 86.25 |
| 143 | 1.98 | 35.39 | 0.78 | 8.32  | 1.76 | 0.02 | 5.05 | 0.02 | 0.13 | 0.05 | 33.33 | 0.02 | 86.84 |
| 145 | 2.32 | 34.71 | 0.80 | 8.03  | 1.70 | 0.01 | 5.20 | 0.05 | 0.12 | 0.00 | 35.54 | 0.02 | 88.49 |
| 150 | 2.11 | 35.48 | 1.27 | 9.11  | 1.93 | 0.01 | 5.60 | 0.02 | 0.36 | 0.00 | 31.59 | 0.00 | 87.47 |
| 154 | 2.02 | 36.45 | 1.09 | 8.57  | 1.81 | 0.04 | 5.44 | 0.03 | 0.36 | 0.00 | 31.19 | 0.04 | 87.05 |
| 155 | 2.29 | 33.63 | 1.04 | 8.67  | 1.84 | 0.02 | 5.51 | 0.05 | 0.26 | 0.00 | 32.62 | 0.00 | 85.93 |
| 157 | 1.90 | 36.45 | 1.08 | 9.59  | 2.03 | 0.03 | 4.87 | 0.04 | 0.18 | 0.00 | 31.40 | 0.03 | 87.60 |
| 158 | 2.00 | 34.65 | 1.11 | 9.37  | 1.98 | 0.04 | 4.84 | 0.05 | 0.15 | 0.00 | 31.93 | 0.00 | 86.11 |
| 161 | 2.75 | 35.48 | 0.24 | 8.93  | 1.89 | 0.01 | 5.76 | 0.04 | 1.41 | 0.16 | 30.77 | 0.12 | 87.54 |
| 162 | 2.00 | 35.56 | 0.67 | 7.47  | 1.58 | 0.01 | 5.20 | 0.04 | 0.10 | 0.00 | 34.03 | 0.00 | 86.66 |
| 163 | 2.00 | 35.05 | 0.74 | 7.47  | 1.58 | 0.02 | 5.41 | 0.03 | 0.19 | 0.00 | 33.85 | 0.03 | 86.37 |
| 164 | 2.25 | 36.33 | 0.72 | 7.59  | 1.61 | 0.03 | 5.21 | 0.06 | 0.22 | 0.02 | 32.49 | 0.00 | 86.51 |
| 165 | 2.01 | 34.98 | 0.58 | 7.33  | 1.55 | 0.02 | 5.31 | 0.05 | 0.30 | 0.00 | 32.80 | 0.08 | 85.00 |
| 167 | 2.13 | 35.92 | 0.73 | 7.68  | 1.63 | 0.02 | 5.65 | 0.25 | 0.59 | 0.00 | 32.18 | 0.00 | 86.77 |
| 172 | 1.99 | 34.84 | 0.77 | 7.87  | 1.67 | 0.03 | 5.40 | 0.03 | 0.51 | 0.00 | 33.09 | 0.02 | 86.21 |
| 173 | 2.06 | 35.67 | 0.53 | 7.23  | 1.53 | 0.01 | 5.07 | 0.02 | 0.18 | 0.00 | 34.39 | 0.01 | 86.70 |
| 174 | 2.04 | 34.95 | 0.50 | 7.47  | 1.58 | 0.03 | 5.18 | 0.02 | 0.15 | 0.00 | 34.50 | 0.01 | 86.44 |
| 175 | 2.09 | 35.16 | 0.57 | 7.38  | 1.56 | 0.03 | 5.21 | 0.04 | 0.27 | 0.00 | 33.97 | 0.00 | 86.28 |
| 176 | 2.08 | 35.44 | 0.55 | 7.30  | 1.54 | 0.00 | 5.37 | 0.02 | 0.21 | 0.00 | 34.72 | 0.02 | 87.24 |
| 178 | 2.13 | 34.60 | 0.77 | 6.85  | 1.45 | 0.00 | 5.95 | 0.05 | 0.42 | 0.00 | 32.94 | 0.02 | 85.17 |
| 180 | 2.27 | 35.44 | 0.63 | 7.40  | 1.57 | 0.03 | 5.49 | 0.04 | 0.36 | 0.00 | 33.60 | 0.08 | 86.90 |
| 182 | 2.18 | 35.22 | 0.72 | 7.97  | 1.69 | 0.03 | 5.71 | 0.05 | 0.50 | 0.00 | 32.85 | 0.02 | 86.93 |
| 183 | 2.33 | 34.95 | 0.37 | 7.44  | 1.57 | 0.03 | 5.38 | 0.04 | 0.48 | 0.01 | 33.57 | 0.00 | 86.17 |

|     |      |       |      |      |      |      |      |      |      |      |       |      |       |
|-----|------|-------|------|------|------|------|------|------|------|------|-------|------|-------|
| 188 | 2.37 | 34.66 | 0.53 | 8.30 | 1.76 | 0.03 | 5.85 | 0.17 | 0.60 | 0.01 | 33.20 | 0.00 | 87.47 |
| 189 | 2.39 | 34.91 | 0.53 | 7.63 | 1.62 | 0.05 | 5.48 | 0.15 | 0.48 | 0.01 | 32.64 | 0.00 | 85.88 |
| 191 | 2.37 | 33.95 | 0.62 | 7.26 | 1.54 | 0.02 | 6.06 | 0.05 | 0.35 | 0.00 | 34.49 | 0.00 | 86.68 |
| 192 | 2.15 | 35.60 | 0.62 | 7.72 | 1.63 | 0.02 | 5.57 | 0.09 | 0.32 | 0.00 | 32.24 | 0.00 | 85.96 |
| 193 | 2.18 | 35.75 | 0.51 | 6.84 | 1.45 | 0.01 | 5.48 | 0.04 | 0.14 | 0.00 | 34.02 | 0.02 | 86.43 |
| 194 | 2.32 | 36.98 | 0.50 | 7.65 | 1.62 | 0.01 | 5.63 | 0.27 | 0.48 | 0.05 | 31.28 | 0.02 | 86.82 |
| 196 | 2.04 | 35.26 | 0.50 | 8.02 | 1.70 | 0.03 | 5.05 | 0.02 | 0.22 | 0.00 | 34.78 | 0.00 | 87.62 |
| 197 | 1.93 | 35.78 | 0.40 | 8.00 | 1.69 | 0.03 | 4.73 | 0.21 | 0.16 | 0.00 | 33.60 | 0.00 | 86.52 |
| 200 | 1.88 | 34.97 | 0.64 | 8.18 | 1.73 | 0.00 | 4.87 | 0.03 | 0.25 | 0.06 | 34.18 | 0.00 | 86.79 |
| 201 | 2.08 | 35.46 | 0.62 | 7.39 | 1.56 | 0.04 | 5.53 | 0.05 | 0.34 | 0.00 | 32.87 | 0.00 | 85.95 |
| 202 | 1.92 | 35.66 | 0.68 | 7.43 | 1.57 | 0.00 | 5.21 | 0.03 | 0.26 | 0.00 | 33.76 | 0.03 | 86.54 |
| 203 | 1.93 | 36.26 | 0.52 | 7.55 | 1.60 | 0.00 | 4.90 | 0.17 | 0.39 | 0.04 | 33.11 | 0.01 | 86.48 |
| 204 | 1.99 | 36.14 | 0.56 | 7.03 | 1.49 | 0.04 | 5.44 | 0.03 | 0.25 | 0.00 | 33.67 | 0.05 | 86.69 |
| 205 | 2.16 | 36.33 | 0.56 | 7.33 | 1.55 | 0.03 | 5.44 | 0.04 | 0.23 | 0.00 | 33.17 | 0.04 | 86.88 |
| 209 | 2.15 | 35.71 | 0.59 | 7.22 | 1.53 | 0.06 | 5.52 | 0.01 | 0.21 | 0.00 | 33.24 | 0.00 | 86.24 |
| 210 | 2.07 | 35.68 | 0.70 | 7.27 | 1.54 | 0.01 | 5.59 | 0.03 | 0.26 | 0.03 | 32.93 | 0.01 | 86.13 |
| 211 | 2.19 | 35.67 | 0.66 | 7.49 | 1.59 | 0.02 | 5.48 | 0.03 | 0.33 | 0.00 | 33.25 | 0.00 | 86.70 |
| 212 | 2.17 | 35.80 | 0.65 | 7.50 | 1.59 | 0.04 | 5.68 | 0.03 | 0.31 | 0.00 | 32.87 | 0.03 | 86.66 |
| 213 | 2.13 | 35.27 | 0.61 | 7.35 | 1.56 | 0.02 | 5.65 | 0.04 | 0.23 | 0.00 | 33.13 | 0.00 | 85.98 |
| 214 | 2.18 | 35.59 | 0.57 | 7.39 | 1.56 | 0.03 | 5.68 | 0.04 | 0.35 | 0.02 | 33.04 | 0.01 | 86.45 |
| 215 | 1.88 | 34.95 | 0.54 | 7.38 | 1.56 | 0.00 | 5.28 | 0.03 | 0.21 | 0.00 | 33.83 | 0.01 | 85.67 |
| 216 | 1.98 | 36.36 | 0.51 | 7.94 | 1.68 | 0.01 | 5.36 | 0.02 | 0.45 | 0.00 | 33.14 | 0.01 | 87.45 |
| 217 | 1.92 | 35.53 | 0.66 | 7.83 | 1.66 | 0.01 | 5.43 | 0.02 | 0.39 | 0.00 | 33.28 | 0.01 | 86.72 |
| 220 | 2.25 | 36.17 | 0.63 | 7.57 | 1.60 | 0.00 | 5.83 | 0.03 | 0.35 | 0.00 | 33.03 | 0.00 | 87.47 |
| 221 | 2.14 | 35.42 | 0.83 | 7.83 | 1.66 | 0.00 | 5.98 | 0.01 | 0.34 | 0.00 | 32.28 | 0.02 | 86.50 |
| 222 | 2.04 | 35.26 | 0.74 | 7.64 | 1.62 | 0.01 | 5.78 | 0.03 | 0.40 | 0.00 | 32.52 | 0.00 | 86.03 |
| 223 | 2.17 | 35.46 | 0.78 | 7.96 | 1.68 | 0.02 | 5.81 | 0.03 | 0.36 | 0.00 | 32.24 | 0.00 | 86.51 |
| 228 | 2.05 | 35.22 | 0.92 | 7.81 | 1.65 | 0.00 | 6.05 | 0.06 | 0.51 | 0.00 | 32.24 | 0.07 | 86.59 |
| 229 | 2.06 | 35.01 | 1.02 | 7.51 | 1.59 | 0.00 | 6.44 | 0.02 | 0.51 | 0.00 | 32.27 | 0.00 | 86.42 |
| 230 | 2.03 | 35.38 | 1.03 | 7.34 | 1.55 | 0.00 | 6.48 | 0.02 | 0.54 | 0.00 | 32.00 | 0.00 | 86.38 |
| 231 | 2.32 | 35.38 | 0.74 | 8.17 | 1.73 | 0.01 | 6.09 | 0.27 | 0.74 | 0.00 | 32.00 | 0.03 | 87.47 |
| 232 | 2.04 | 35.65 | 0.97 | 7.90 | 1.67 | 0.01 | 6.03 | 0.03 | 0.41 | 0.00 | 32.20 | 0.03 | 86.92 |
| 233 | 2.12 | 35.28 | 0.82 | 7.95 | 1.68 | 0.04 | 5.81 | 0.02 | 0.43 | 0.00 | 32.51 | 0.04 | 86.68 |
| 234 | 2.08 | 35.47 | 0.84 | 7.80 | 1.65 | 0.01 | 5.72 | 0.05 | 0.54 | 0.00 | 32.94 | 0.00 | 87.09 |
| 235 | 1.91 | 35.24 | 0.85 | 7.79 | 1.65 | 0.01 | 5.50 | 0.01 | 0.49 | 0.00 | 32.96 | 0.00 | 86.42 |
| 236 | 1.97 | 35.44 | 0.78 | 7.94 | 1.68 | 0.00 | 5.52 | 0.02 | 0.47 | 0.00 | 32.80 | 0.04 | 86.67 |
| 237 | 1.82 | 35.76 | 0.70 | 7.73 | 1.64 | 0.01 | 5.34 | 0.26 | 0.44 | 0.00 | 31.32 | 0.00 | 85.00 |
| 238 | 2.02 | 35.07 | 0.89 | 8.15 | 1.72 | 0.00 | 5.40 | 0.02 | 0.51 | 0.00 | 32.24 | 0.00 | 86.02 |
| 239 | 2.07 | 35.25 | 0.90 | 7.99 | 1.69 | 0.03 | 5.66 | 0.03 | 0.67 | 0.04 | 31.83 | 0.03 | 86.18 |
| 240 | 2.04 | 35.67 | 0.39 | 7.25 | 1.53 | 0.04 | 4.82 | 0.06 | 0.17 | 0.00 | 35.11 | 0.00 | 87.08 |
| 241 | 2.10 | 35.44 | 0.42 | 7.02 | 1.49 | 0.03 | 4.92 | 0.05 | 0.29 | 0.00 | 34.73 | 0.01 | 86.48 |
| 242 | 1.94 | 35.61 | 0.40 | 7.00 | 1.48 | 0.05 | 4.62 | 0.02 | 0.19 | 0.00 | 34.78 | 0.02 | 86.10 |
| 245 | 2.01 | 35.26 | 0.41 | 7.17 | 1.52 | 0.01 | 4.72 | 0.02 | 0.21 | 0.01 | 34.91 | 0.00 | 86.24 |
| 248 | 2.04 | 35.43 | 0.56 | 7.69 | 1.63 | 0.02 | 5.18 | 0.03 | 0.35 | 0.00 | 33.86 | 0.02 | 86.81 |
| 252 | 2.01 | 35.68 | 0.41 | 6.45 | 1.36 | 0.02 | 5.22 | 0.04 | 0.18 | 0.01 | 35.10 | 0.00 | 86.46 |
| 253 | 2.17 | 35.60 | 0.44 | 6.81 | 1.44 | 0.02 | 5.25 | 0.03 | 0.13 | 0.00 | 34.98 | 0.01 | 86.89 |
| 254 | 2.42 | 35.39 | 0.42 | 8.64 | 1.83 | 0.00 | 5.50 | 0.04 | 0.86 | 0.00 | 31.91 | 0.00 | 87.01 |
| 255 | 2.04 | 35.75 | 0.42 | 7.05 | 1.49 | 0.04 | 4.92 | 0.00 | 0.27 | 0.00 | 34.33 | 0.00 | 86.32 |
| 256 | 2.19 | 35.99 | 0.46 | 7.42 | 1.57 | 0.03 | 5.27 | 0.02 | 0.31 | 0.00 | 33.07 | 0.00 | 86.33 |

|     |      |       |      |       |      |      |      |      |      |      |       |      |       |
|-----|------|-------|------|-------|------|------|------|------|------|------|-------|------|-------|
| 257 | 2.34 | 36.73 | 0.41 | 9.06  | 1.92 | 0.01 | 5.20 | 0.11 | 0.84 | 0.04 | 29.89 | 0.01 | 86.55 |
| 258 | 2.18 | 35.05 | 0.60 | 8.04  | 1.70 | 0.04 | 5.55 | 0.02 | 0.55 | 0.00 | 32.69 | 0.01 | 86.44 |
| 260 | 2.12 | 36.46 | 0.63 | 7.80  | 1.65 | 0.03 | 5.56 | 0.03 | 0.35 | 0.00 | 32.60 | 0.02 | 87.25 |
| 261 | 2.07 | 36.03 | 0.67 | 7.03  | 1.49 | 0.01 | 5.69 | 0.02 | 0.26 | 0.00 | 33.60 | 0.00 | 86.86 |
| 263 | 2.11 | 35.67 | 0.50 | 7.08  | 1.50 | 0.00 | 5.21 | 0.02 | 0.19 | 0.00 | 33.99 | 0.00 | 86.28 |
| 264 | 2.17 | 35.26 | 0.55 | 7.01  | 1.48 | 0.00 | 5.36 | 0.04 | 0.24 | 0.00 | 34.12 | 0.01 | 86.23 |
| 265 | 2.29 | 35.87 | 0.67 | 7.72  | 1.63 | 0.05 | 5.44 | 0.04 | 0.35 | 0.00 | 33.00 | 0.01 | 87.08 |
| 266 | 2.35 | 35.31 | 0.62 | 8.88  | 1.88 | 0.02 | 5.46 | 0.03 | 0.93 | 0.04 | 30.55 | 0.02 | 86.10 |
| 267 | 2.22 | 35.74 | 0.93 | 8.39  | 1.78 | 0.03 | 5.89 | 0.03 | 0.66 | 0.00 | 31.14 | 0.05 | 86.86 |
| 268 | 1.95 | 34.96 | 0.97 | 8.24  | 1.74 | 0.01 | 5.69 | 0.01 | 0.55 | 0.00 | 32.15 | 0.02 | 86.31 |
| 269 | 2.19 | 35.88 | 0.80 | 8.28  | 1.75 | 0.01 | 5.87 | 0.01 | 0.46 | 0.00 | 32.13 | 0.06 | 87.44 |
| 270 | 2.12 | 35.93 | 0.53 | 7.49  | 1.59 | 0.02 | 5.46 | 0.20 | 0.27 | 0.00 | 33.10 | 0.00 | 86.71 |
| 271 | 2.11 | 34.81 | 0.61 | 7.23  | 1.53 | 0.05 | 5.22 | 0.05 | 0.17 | 0.00 | 33.34 | 0.00 | 85.10 |
| 272 | 2.08 | 35.79 | 0.96 | 8.09  | 1.71 | 0.04 | 5.85 | 0.05 | 0.29 | 0.00 | 32.34 | 0.00 | 87.20 |
| 273 | 2.15 | 35.25 | 0.88 | 7.61  | 1.61 | 0.03 | 5.61 | 0.03 | 0.23 | 0.00 | 32.82 | 0.00 | 86.22 |
| 274 | 2.16 | 35.62 | 0.97 | 7.70  | 1.63 | 0.01 | 5.97 | 0.03 | 0.31 | 0.00 | 32.40 | 0.01 | 86.81 |
| 275 | 2.04 | 35.97 | 1.06 | 7.94  | 1.68 | 0.01 | 5.95 | 0.03 | 0.28 | 0.00 | 32.13 | 0.05 | 87.12 |
| 276 | 2.07 | 35.59 | 0.70 | 7.73  | 1.64 | 0.02 | 5.21 | 0.05 | 0.09 | 0.00 | 33.63 | 0.00 | 86.73 |
| 277 | 2.12 | 35.43 | 1.07 | 8.09  | 1.71 | 0.02 | 5.89 | 0.01 | 0.22 | 0.00 | 31.85 | 0.00 | 86.41 |
| 278 | 2.12 | 35.99 | 1.01 | 8.27  | 1.75 | 0.02 | 5.68 | 0.05 | 0.15 | 0.00 | 31.81 | 0.05 | 86.90 |
| 279 | 2.58 | 35.90 | 0.57 | 9.26  | 1.96 | 0.03 | 5.48 | 0.03 | 0.72 | 0.06 | 31.45 | 0.01 | 88.04 |
| 282 | 2.02 | 35.50 | 1.18 | 8.68  | 1.84 | 0.00 | 5.62 | 0.01 | 0.44 | 0.00 | 31.29 | 0.00 | 86.56 |
| 283 | 2.06 | 35.55 | 0.79 | 8.27  | 1.75 | 0.02 | 5.06 | 0.02 | 0.20 | 0.00 | 33.10 | 0.00 | 86.81 |
| 284 | 2.04 | 34.90 | 1.17 | 9.05  | 1.92 | 0.02 | 5.54 | 0.01 | 0.30 | 0.00 | 31.38 | 0.00 | 86.33 |
| 285 | 2.08 | 35.01 | 1.20 | 9.21  | 1.95 | 0.00 | 5.69 | 0.03 | 0.36 | 0.00 | 30.97 | 0.05 | 86.55 |
| 287 | 2.09 | 35.26 | 1.07 | 8.64  | 1.83 | 0.05 | 5.55 | 0.03 | 0.24 | 0.00 | 32.61 | 0.00 | 87.37 |
| 288 | 2.08 | 35.39 | 1.20 | 9.19  | 1.95 | 0.03 | 5.90 | 0.02 | 0.27 | 0.00 | 31.74 | 0.00 | 87.76 |
| 289 | 2.04 | 34.45 | 1.07 | 8.78  | 1.86 | 0.04 | 5.33 | 0.02 | 0.24 | 0.00 | 31.68 | 0.00 | 85.51 |
| 290 | 2.20 | 36.45 | 1.14 | 9.26  | 1.96 | 0.00 | 5.67 | 0.04 | 0.39 | 0.00 | 30.59 | 0.00 | 87.69 |
| 291 | 1.95 | 34.28 | 1.24 | 9.47  | 2.00 | 0.08 | 5.43 | 0.06 | 0.26 | 0.00 | 30.04 | 0.00 | 84.79 |
| 292 | 2.13 | 35.77 | 1.34 | 8.91  | 1.89 | 0.03 | 5.79 | 0.03 | 0.39 | 0.00 | 31.62 | 0.00 | 87.89 |
| 293 | 2.27 | 35.03 | 0.91 | 8.36  | 1.77 | 0.03 | 5.35 | 0.03 | 0.16 | 0.00 | 33.13 | 0.06 | 87.08 |
| 294 | 2.12 | 34.80 | 0.92 | 8.29  | 1.75 | 0.03 | 5.46 | 0.06 | 0.17 | 0.00 | 32.82 | 0.00 | 86.43 |
| 295 | 2.20 | 36.40 | 0.99 | 7.99  | 1.69 | 0.02 | 5.52 | 0.04 | 0.21 | 0.00 | 33.22 | 0.03 | 88.31 |
| 296 | 2.23 | 35.47 | 0.81 | 8.34  | 1.77 | 0.04 | 5.49 | 0.04 | 0.10 | 0.00 | 32.78 | 0.03 | 87.10 |
| 297 | 2.31 | 35.11 | 0.80 | 8.27  | 1.75 | 0.00 | 5.37 | 0.03 | 0.12 | 0.00 | 32.91 | 0.00 | 86.66 |
| 298 | 2.24 | 35.76 | 0.78 | 8.33  | 1.76 | 0.02 | 5.36 | 0.06 | 0.12 | 0.00 | 33.06 | 0.00 | 87.49 |
| 300 | 2.23 | 35.12 | 0.74 | 8.07  | 1.71 | 0.04 | 5.40 | 0.03 | 0.14 | 0.00 | 33.28 | 0.00 | 86.76 |
| 302 | 2.09 | 35.03 | 1.34 | 9.21  | 1.95 | 0.03 | 6.10 | 0.05 | 0.76 | 0.00 | 30.61 | 0.01 | 87.17 |
| 303 | 2.73 | 35.15 | 0.47 | 10.51 | 2.22 | 0.03 | 5.59 | 0.06 | 2.09 | 0.06 | 29.04 | 0.08 | 88.02 |
| 304 | 2.21 | 36.17 | 0.78 | 7.79  | 1.65 | 0.07 | 5.25 | 0.04 | 0.22 | 0.00 | 32.90 | 0.05 | 87.11 |
| 306 | 2.19 | 35.95 | 0.91 | 7.84  | 1.66 | 0.00 | 5.35 | 0.03 | 0.21 | 0.00 | 32.33 | 0.03 | 86.51 |
| 33  | 3.08 | 35.49 | 0.05 | 9.89  | 2.09 | 0.00 | 6.07 | 0.07 | 1.31 | 0.03 | 29.80 | 0.03 | 87.89 |
| 55  | 2.20 | 34.18 | 1.76 | 8.84  | 1.87 | 0.04 | 7.01 | 0.03 | 1.86 | 0.02 | 30.38 | 0.07 | 88.25 |
| 69  | 2.47 | 34.93 | 0.89 | 8.81  | 1.87 | 0.04 | 5.75 | 0.02 | 0.94 | 0.00 | 30.70 | 0.00 | 86.41 |
| 72  | 2.35 | 35.13 | 0.92 | 9.13  | 1.93 | 0.02 | 5.23 | 0.04 | 1.50 | 0.00 | 32.01 | 0.03 | 88.29 |
| 73  | 2.14 | 35.23 | 0.86 | 9.05  | 1.92 | 0.01 | 5.27 | 0.03 | 1.89 | 0.00 | 31.50 | 0.09 | 87.99 |
| 74  | 2.21 | 35.54 | 0.72 | 8.51  | 1.80 | 0.03 | 5.43 | 0.05 | 1.70 | 0.00 | 31.19 | 0.07 | 87.26 |
| 75  | 2.01 | 35.41 | 0.77 | 7.34  | 1.55 | 0.05 | 5.30 | 0.00 | 0.51 | 0.00 | 34.02 | 0.02 | 86.98 |

|     |      |       |      |      |      |      |      |      |      |      |       |      |       |
|-----|------|-------|------|------|------|------|------|------|------|------|-------|------|-------|
| 77  | 2.37 | 36.66 | 1.01 | 9.18 | 1.94 | 0.04 | 6.26 | 0.03 | 1.58 | 0.01 | 29.20 | 0.12 | 88.40 |
| 113 | 2.14 | 35.22 | 1.51 | 9.36 | 1.98 | 0.02 | 6.31 | 0.05 | 1.83 | 0.04 | 29.15 | 0.01 | 87.61 |
| 114 | 2.04 | 34.16 | 1.58 | 8.72 | 1.84 | 0.01 | 6.53 | 0.03 | 1.61 | 0.00 | 30.33 | 0.05 | 86.88 |
| 115 | 1.96 | 34.88 | 1.51 | 8.94 | 1.89 | 0.04 | 6.36 | 0.02 | 1.43 | 0.03 | 29.73 | 0.07 | 86.85 |

---
