# Supplementary material for: Dutrowite, Na(Fe2+2.5Ti0.5)Al6(Si6O18)(BO3)3(OH)3O, a new mineral from the Apuan Alps (Tuscany, Italy): the first member of the tourmaline supergroup with Ti as a species-forming chemical constituent
Source: Copernicus journal article supplement (doi:10.5194/ejm-35-81-2023), 2023-02-10
Supplement: Supplementary file 2 [file ejm-35-81-2023-supplement.zip › additional chemical data.xlsx]

## Sheet: Foglio1
No.	Na2O	SiO2	CaO	FeO	Fe2O3	MnO	MgO	K2O	TiO2	SrO	Al2O3	V2O3	Totale
2	2.51	34.327	1.151	10.4446	2.21096	0.039	6.364	0.053	4.372	0.073	26.504	0.157	88.2055
3	2.34	34.77	1.289	10.1858	2.15619	0.042	6.484	0.063	4.992	0	25.826	0.181	88.329
4	2.261	34.612	1.509	9.9204	2.1	0.02	6.523	0.061	4.307	0.101	26.365	0.186	87.9654
5	2.429	34.743	0.878	9.39204	1.98816	0.024	6.078	0.053	2.782	0	28.693	0.14	87.2002
6	2.533	34.643	1.105	10.6302	2.25026	0.015	6.308	0.057	4.801	0	26.073	0.167	88.5825
7	2.407	33.86	1.194	10.4252	2.20687	0.05	6.229	0.062	5.014	0	25.712	0.183	87.3431
8	2.706	34.377	0.764	9.69864	2.05306	0.01	6.262	0.048	4.044	0	28.016	0.208	88.1867
9	2.539	34.202	1.124	9.97248	2.11103	0.023	6.396	0.068	4.056	0	26.741	0.165	87.3975
10	2.507	33.912	1.133	10.3194	2.18446	0.017	6.313	0.067	5.008	0	25.642	0.177	87.2799
11	2.467	34.372	0.788	9.39204	1.98816	0.035	6.162	0.047	3.379	0	28.505	0.116	87.2512
12	2.858	34.345	0.929	10.2472	2.16917	0.029	6.419	0.043	3.405	0	29.192	0.12	89.7563
13	2.428	34.268	1.12	10.7915	2.2844	0.031	5.786	0.072	5.647	0	24.689	0.221	87.3379
14	2.597	34.894	0.957	9.99264	2.11529	0.01	5.921	0.036	3.122	0.042	27.485	0.117	87.2889
15	2.398	35.113	1.226	9.1476	1.93641	0.04	6.655	0.037	2.245	0	28.719	0.244	87.761
16	2.43	34.929	1.172	9.33828	1.97678	0.025	6.727	0.038	2.562	0	28.388	0.19	87.7761
17	2.471	35.033	1.014	9.37524	1.9846	0.022	6.748	0.042	2.724	0.071	28.371	0.133	87.9888
18	2.413	34.624	1.09	8.96364	1.89747	0.021	6.758	0.036	2.767	0	28.366	0.167	87.1031
19	2.515	34.503	0.987	9.46932	2.00452	0.038	6.524	0.048	2.626	0	28.289	0.166	87.1698
20	2.5	35.596	0.957	9.51636	2.01447	0.024	6.505	0.026	2.726	0.029	27.904	0.199	87.9968
21	2.413	34.384	1.041	9.1476	1.93641	0.033	6.475	0.037	2.712	0.006	28.431	0.146	86.762
22	2.374	35.072	1.182	9.30216	1.96913	0.064	6.778	0.045	2.748	0	27.988	0.172	87.6943
23	2.5	35.142	1.102	9.31476	1.9718	0.037	6.634	0.018	2.74	0.029	28.479	0.214	88.1816
24	2.457	34.371	1.06	9.54156	2.01981	0.048	6.451	0.051	2.608	0	28.505	0.126	87.2384
25	2.478	35.274	1.059	9.44076	1.99847	0.027	6.302	0.034	2.582	0	28.31	0.125	87.6302
26	2.569	34.88	0.772	10.0565	2.12881	0.017	6.075	0.035	2.516	0	28.188	0.048	87.2853
27	2.436	34.741	1.092	9.69696	2.0527	0.013	6.583	0.021	2.875	0	28.481	0.221	88.2127
28	2.504	35.298	0.964	9.35424	1.98015	0.06	6.395	0.036	2.773	0	28.698	0.116	88.1784
29	2.498	35.087	0.971	9.75576	2.06515	0.054	6.202	0.04	3.253	0	28.008	0.117	88.0509
30	2.59	34.464	0.959	9.99096	2.11494	0.016	6.253	0.057	3.454	0	28.195	0.166	88.2599
31	2.384	34.669	0.988	9.66336	2.04559	0.026	6.169	0.02	3.949	0.048	27.754	0.085	87.801
34	2.533	34.415	1.026	9.88512	2.09253	0.026	6.22	0.021	3.981	0.005	27.389	0.104	87.6977
35	2.438	34.932	0.993	9.78516	2.07137	0.024	6.196	0.049	3.584	0	27.689	0.15	87.9115
36	2.681	34.538	1.06	10.1783	2.15459	0.01	6.375	0.023	3.802	0	27.309	0.116	88.2469
37	2.258	34.333	1.467	10.248	2.16935	0.001	6.388	0.046	4.416	0.014	26.114	0.126	87.5804
38	2.312	34.237	1.496	10.0699	2.13165	0.018	6.621	0.063	4.512	0	26.7	0.159	88.3196
39	2.951	34.353	0.259	11.6138	2.45848	0	5.557	0.042	3.026	0.104	28.08	0.011	88.4553
40	2.325	34.214	1.54	10.222	2.16384	0.025	6.674	0.05	3.746	0	26.944	0.162	88.0658
41	2.29	33.824	1.348	9.84564	2.08418	0.021	6.347	0.047	3.641	0.036	27.313	0.086	86.8828
42	2.212	33.921	1.617	10.0481	2.12703	0.017	6.382	0.043	4.52	0	26.479	0.12	87.4861
43	2.139	34.677	1.54	9.74232	2.06231	0.024	6.393	0.033	3.13	0	28.276	0.201	88.2176
44	2.346	33.979	1.414	10.3261	2.18589	0.003	6.481	0.049	3.883	0	26.918	0.122	87.707
45	2.459	33.862	1.085	9.79188	2.0728	0.022	6.116	0.046	3.465	0	27.371	0.158	86.4487
46	2.49	34.402	1.053	10.2858	2.17735	0.029	6.213	0.051	4.356	0	26.535	0.142	87.7342
47	2.457	34.289	1.12	10.4908	2.22074	0.014	6.202	0.046	4.846	0.016	26.218	0.221	88.1405
48	2.305	35.042	1.262	9.26184	1.96059	0.029	6.819	0.033	3.055	0.007	27.97	0.178	87.9224
49	2.162	35.055	1.104	9.12072	1.93072	0.016	6.17	0.073	2.474	0	27.045	0.112	85.2624
50	2.398	33.621	1.04	9.34836	1.97891	0.039	6.111	0.058	2.451	0	28.278	0.087	85.4103
51	2.377	34.785	1.334	9.60036	2.03225	0.05	6.061	0.052	3.151	0.097	26.336	0.197	86.0726
52	2.34	34.305	1.328	9.5928	2.03065	0.075	6.527	0.054	2.946	0	28.167	0.085	87.4505
54	2.079	34.082	1.603	9.85992	2.0872	0.01	6.378	0.029	4.643	0	25.812	0.085	86.6681
56	2.202	34.821	1.366	9.57432	2.02674	0.009	6.38	0.03	3.71	0	27.189	0.088	87.3961
57	2.428	34.166	1.099	9.18288	1.94388	0.023	6.348	0.044	2.501	0	28.901	0.053	86.6898
58	2.368	34.82	0.838	9.38196	1.98602	0.014	5.983	0.05	3.302	0.046	28.769	0.099	87.657
59	2.412	34.386	0.831	9.4752	2.00576	0	5.95	0.023	3.676	0	27.677	0.103	86.539
60	2.402	34.312	0.68	9.92544	2.10107	0.019	5.614	0.02	2.696	0.088	28.678	0.089	86.6245
61	2.577	34.446	0.856	9.28032	1.96451	0.038	6.31	0.067	4.552	0	28.419	0.143	88.6528
62	2.16	35.667	1.42	10.0682	2.1313	0.013	6.134	0.071	3.787	0.006	26.711	0.108	88.2765
63	2.281	34.364	1.435	10.2782	2.17575	0.033	6.238	0.061	5.288	0	25.99	0.15	88.294
64	2.628	34.375	1.028	10.1657	2.15192	0.032	6.135	0.053	5.535	0	25.596	0.151	87.8506
65	2.506	34.397	0.852	9.81456	2.0776	0.023	6.015	0.038	3.546	0.023	27.721	0.185	87.1982
66	2.595	34.232	1.099	10.673	2.25933	0.052	6.076	0.035	4.573	0	26.293	0.149	88.0364
67	2.487	34.985	1.152	10.1094	2.14001	0.062	6.134	0.062	2.474	0.062	28.022	0.055	87.7444
68	2.465	35.252	0.938	9.37608	1.98478	0.043	6.08	0.045	2.3	0	28.934	0.068	87.4859
70	2.337	34.324	1.139	9.19212	1.94584	0.047	5.921	0.033	2.646	0	29.007	0.07	86.662
76	2.266	34.566	0.999	8.76036	1.85444	0.031	6.264	0.032	2.939	0	30.659	0.117	88.4878
78	2.631	34.398	1.262	9.36936	1.98336	0.022	6.81	0.028	2.908	0	29.02	0.13	88.5617
79	2.371	34.332	1.113	9.4038	1.99065	0.022	6.557	0.047	2.642	0	27.786	0.234	86.4984
80	2.507	34.955	1.057	9.08376	1.9229	0.025	6.576	0.043	2.754	0	28.439	0.146	87.5087
81	2.516	34.994	1.071	9.14676	1.93623	0.036	6.502	0.013	2.977	0	28.303	0.127	87.622
82	2.464	35.082	1.279	9.35676	1.98069	0.055	6.677	0.042	2.451	0.013	28.322	0.122	87.8444
83	2.457	34.525	1.21	9.12156	1.9309	0	6.772	0.043	2.789	0	27.845	0.139	86.8325
84	2.509	35.101	0.888	9.66252	2.04541	0	6.294	0.027	2.451	0	28.666	0.133	87.7769
85	2.499	34.914	1.002	9.53316	2.01803	0.038	6.427	0.035	2.773	0	28.314	0.1	87.6532
86	2.499	35.152	1.076	9.27276	1.96291	0.014	6.489	0.022	2.897	0	27.795	0.133	87.3127
87	2.502	35.181	0.872	9.50376	2.01181	0.048	6.395	0.025	2.502	0	27.909	0.197	87.1466
88	2.566	34.884	1.045	9.60204	2.03261	0.035	6.439	0.031	2.71	0.043	28.721	0.036	88.1447
89	2.569	34.866	1.115	9.77004	2.06817	0.005	6.591	0.037	2.953	0	28.036	0.241	88.2512
91	2.511	35.016	0.946	9.56004	2.02372	0.033	6.27	0.062	2.702	0.004	28.287	0.11	87.5248
92	2.573	35.127	0.968	9.76164	2.0664	0.032	6.237	0.041	2.661	0	28.212	0.123	87.802
93	2.541	35.538	1.004	9.69528	2.05235	0.053	6.464	0.043	2.608	0	28.143	0.146	88.2876
94	2.51	35.206	1.009	10.0187	2.12081	0.023	6.242	0.036	2.49	0	28.782	0.105	88.5425
95	2.547	35.022	1.042	9.79776	2.07404	0.008	6.349	0.049	2.891	0	27.966	0.052	87.7978
96	2.443	34.689	0.839	9.69612	2.05253	0.056	6.102	0.024	2.351	0	28.674	0.074	87.0006
97	2.507	34.847	0.885	9.96072	2.10854	0.035	6.054	0.055	2.674	0	28.536	0.074	87.7363
98	2.433	34.885	1.01	9.9036	2.09645	0.046	6.17	0.031	2.728	0	28.28	0.087	87.67
99	2.458	34.549	1.147	9.83892	2.08275	0.039	6.385	0.05	2.769	0.008	27.855	0.145	87.3267
100	2.429	35.228	1.087	9.70788	2.05502	0.009	6.651	0.107	2.981	0.039	27.754	0.182	88.2299
101	2.365	35.589	1.133	9.63312	2.03919	0	6.697	0.079	3.585	0	27.17	0.198	88.4883
102	2.522	34.548	1.1	10.1018	2.13841	0.02	6.22	0.061	4.974	0	25.937	0.189	87.8113
103	2.648	35.002	0.583	10.1825	2.15548	0.036	5.851	0.237	2.799	0	27.767	0.055	87.316
104	2.474	34.135	1.239	10.6445	2.25328	0.039	6.172	0.059	4.918	0	25.581	0.114	87.6288
105	2.545	34.162	1.044	10.1447	2.14748	0.063	6.094	0.06	3.788	0	26.737	0.131	86.9162
106	2.394	34.6	0.968	9.90696	2.09716	0.059	6.309	0.015	2.218	0	28.282	0.05	86.8991
107	2.339	34.875	1.236	10.0733	2.13236	0.075	6.33	0.024	2.158	0.017	27.981	0.049	87.2896
108	2.367	35.365	1.284	10.6378	2.25186	0.042	6.104	0.05	2.71	0	27.292	0.054	88.1576
109	2.357	33.822	1.44	10.7327	2.27195	0.041	6.464	0.054	3.885	0	26.211	0.09	87.3686
110	2.375	35.297	0.696	10.0682	2.1313	0.049	5.645	0.665	2.651	0.012	26.807	0.09	86.4865
111	2.076	31.708	1.476	9.62556	2.03759	0.027	5.995	0.038	2.775	0	26.824	0.139	82.7211
112	2.351	34.418	1.087	9.60372	2.03297	0.049	6.042	0.04	2.179	0	28.522	0.081	86.4057
116	2.473	35.487	0.921	8.33028	1.7634	0.055	6.038	0.058	1.018	0.012	31.265	0	87.4207
117	2.499	35.498	1.208	9.96912	2.11032	0.045	6.075	0.02	0.798	0	29.946	0	88.1684
119	2.33	36.856	0.671	9.60708	2.03368	0.036	5.622	0.221	1.338	0.054	29.205	0.037	88.0108
120	2.72	34.371	0.991	10.1052	2.13912	0.052	6.239	0.201	1.002	0.059	30.835	0	88.7143
121	2.219	34.725	1.32	9.5886	2.02977	0.063	6.104	0.035	0.852	0	30.026	0.009	86.9714
122	2.241	35.285	1.08	9.19128	1.94566	0.017	5.96	0.029	0.619	0.061	30.864	0	87.2929
123	2.12	35.037	1.647	10.3782	2.19691	0.084	5.933	0.038	0.714	0.018	29.079	0.044	87.2891
124	2.284	35.581	1.021	9.06696	1.91934	0.065	5.948	0.283	0.601	0.011	30.351	0.004	87.1353
125	2.374	35.437	1.164	8.70576	1.84288	0.031	6.006	0.024	0.65	0	30.852	0.013	87.0996
127	2.183	35.504	1.246	8.76372	1.85515	0.079	5.953	0.015	0.561	0	30.672	0.007	86.8389
128	2.209	34.904	1.01	8.18664	1.73299	0.02	6.015	0.04	0.378	0	31.91	0	86.4056
130	2.103	35.192	1.424	9.05016	1.91579	0.035	6.209	0.018	0.696	0	30.154	0.049	86.8459
131	2.264	34.863	1.353	9.13752	1.93428	0.052	6.213	0.033	0.629	0	30.579	0.02	87.0778
132	2.115	34.515	1.308	9.12996	1.93268	0.04	5.987	0.018	0.573	0.024	30.784	0	86.4266
133	2.139	34.782	1.318	9.2694	1.9622	0.038	5.9	0.024	0.372	0	31.475	0.003	87.2826
134	2.152	34.71	1.343	9.16104	1.93926	0.039	6	0.022	0.499	0	31.871	0.05	87.7863
137	2.476	35.088	0.863	8.19252	1.73424	0.019	5.853	0.051	0.263	0	33.273	0.041	87.8538
138	2.094	35.643	0.884	8.04552	1.70312	0	5.457	0.016	0.153	0	33.108	0.035	87.1386
139	2.143	35.287	0.98	8.15892	1.72712	0.02	5.445	0.02	0.248	0	32.908	0.043	86.98
140	1.965	36.245	0.81	8.04384	1.70276	0.01	4.957	0.037	0.146	0	32.891	0	86.8076
141	2.096	35.344	0.803	8.06904	1.7081	0.027	4.917	0.019	0.128	0	33.428	0.051	86.5901
142	1.925	34.99	1.112	8.46132	1.79114	0.035	5.585	0.033	0.281	0	32.035	0	86.2485
143	1.975	35.388	0.775	8.31936	1.76109	0.024	5.046	0.023	0.128	0.05	33.328	0.021	86.8384
145	2.323	34.705	0.799	8.0304	1.69992	0.005	5.2	0.05	0.12	0	35.542	0.019	88.4933
150	2.11	35.477	1.265	9.10644	1.9277	0.005	5.602	0.021	0.364	0	31.591	0	87.4691
154	2.024	36.453	1.086	8.57052	1.81425	0.039	5.444	0.029	0.357	0	31.193	0.036	87.0458
155	2.288	33.634	1.042	8.66964	1.83523	0.016	5.512	0.048	0.26	0	32.621	0	85.9259
157	1.903	36.454	1.084	9.59196	2.03048	0.03	4.865	0.035	0.183	0	31.395	0.029	87.6004
158	1.995	34.646	1.106	9.3744	1.98442	0.039	4.835	0.05	0.15	0	31.934	0	86.1138
161	2.746	35.48	0.239	8.92752	1.88982	0.012	5.756	0.042	1.411	0.155	30.77	0.115	87.5433
162	2.001	35.559	0.672	7.46844	1.58096	0.013	5.195	0.04	0.102	0	34.028	0	86.6594
163	2.001	35.047	0.735	7.47264	1.58185	0.017	5.411	0.032	0.194	0	33.85	0.028	86.3695
164	2.25	36.328	0.717	7.59192	1.6071	0.026	5.208	0.059	0.217	0.015	32.486	0	86.505
165	2.014	34.976	0.579	7.32732	1.55109	0.023	5.306	0.046	0.299	0	32.801	0.082	85.0044
167	2.13	35.921	0.734	7.6776	1.62523	0.019	5.649	0.252	0.585	0	32.176	0	86.7688
172	1.986	34.836	0.768	7.87164	1.66631	0.03	5.397	0.031	0.513	0	33.089	0.023	86.211
173	2.06	35.667	0.531	7.2282	1.5301	0.014	5.071	0.017	0.182	0	34.39	0.009	86.6993
174	2.035	34.954	0.5	7.47432	1.5822	0.03	5.181	0.02	0.153	0	34.497	0.012	86.4385
175	2.09	35.162	0.572	7.37688	1.56158	0.033	5.21	0.04	0.268	0	33.969	0	86.2825
176	2.075	35.442	0.551	7.29792	1.54486	0	5.367	0.021	0.205	0	34.717	0.023	87.2438
178	2.125	34.603	0.767	6.8502	1.45009	0.001	5.952	0.052	0.417	0	32.935	0.015	85.1673
180	2.266	35.44	0.631	7.39872	1.5662	0.032	5.49	0.044	0.363	0	33.595	0.078	86.9039
182	2.184	35.22	0.715	7.96824	1.68676	0.029	5.713	0.046	0.5	0	32.85	0.015	86.927
183	2.332	34.945	0.371	7.43652	1.5742	0.031	5.381	0.043	0.482	0.014	33.565	0	86.1747
188	2.365	34.659	0.532	8.30004	1.757	0.028	5.845	0.167	0.604	0.01	33.201	0	87.468
189	2.385	34.912	0.526	7.62972	1.6151	0.052	5.48	0.151	0.477	0.013	32.642	0	85.8828
191	2.37	33.947	0.619	7.25844	1.5365	0.016	6.057	0.045	0.345	0	34.488	0	86.6819
192	2.152	35.603	0.622	7.72128	1.63448	0.018	5.565	0.089	0.319	0	32.238	0	85.9618
193	2.177	35.747	0.507	6.83592	1.44706	0.009	5.48	0.043	0.143	0	34.023	0.016	86.428
194	2.324	36.984	0.496	7.65324	1.62008	0.009	5.632	0.273	0.482	0.052	31.283	0.016	86.8243
196	2.041	35.259	0.5	8.02284	1.69832	0.032	5.054	0.018	0.222	0	34.775	0	87.6222
197	1.93	35.776	0.396	7.99764	1.69298	0.032	4.728	0.209	0.158	0	33.601	0	86.5206
200	1.88	34.968	0.636	8.18412	1.73246	0.001	4.87	0.028	0.25	0.061	34.179	0	86.7896
201	2.084	35.461	0.615	7.39284	1.56496	0.04	5.53	0.054	0.337	0	32.874	0	85.9528
202	1.921	35.655	0.675	7.43484	1.57385	0	5.205	0.026	0.258	0	33.76	0.03	86.5387
203	1.929	36.255	0.524	7.55412	1.5991	0.004	4.902	0.168	0.393	0.036	33.111	0.007	86.4822
204	1.992	36.141	0.562	7.02912	1.48796	0.043	5.443	0.026	0.251	0	33.67	0.048	86.6931
205	2.164	36.325	0.558	7.3332	1.55233	0.026	5.443	0.037	0.232	0	33.171	0.043	86.8845
209	2.149	35.709	0.593	7.2198	1.52833	0.062	5.522	0.012	0.207	0	33.24	0	86.2421
210	2.072	35.683	0.7	7.2744	1.53988	0.008	5.588	0.032	0.263	0.027	32.933	0.012	86.1323
211	2.186	35.67	0.663	7.49028	1.58558	0.02	5.477	0.029	0.33	0	33.248	0	86.6989
212	2.17	35.804	0.648	7.497	1.587	0.037	5.676	0.03	0.314	0	32.87	0.028	86.661
213	2.128	35.271	0.61	7.35336	1.5566	0.021	5.646	0.04	0.23	0	33.129	0	85.985
214	2.176	35.594	0.569	7.38864	1.56407	0.03	5.676	0.036	0.35	0.018	33.039	0.006	86.4467
215	1.879	34.95	0.535	7.38192	1.56264	0	5.284	0.026	0.21	0	33.826	0.011	85.6656
216	1.975	36.362	0.507	7.93716	1.68018	0.012	5.363	0.016	0.449	0	33.143	0.01	87.4543
217	1.917	35.525	0.664	7.82544	1.65653	0.005	5.431	0.024	0.393	0	33.276	0.007	86.724
220	2.245	36.171	0.628	7.57092	1.60265	0	5.834	0.032	0.353	0	33.033	0	87.4696
221	2.138	35.421	0.83	7.82712	1.65689	0	5.975	0.007	0.342	0	32.283	0.019	86.499
222	2.041	35.259	0.739	7.63728	1.6167	0.009	5.782	0.029	0.399	0	32.522	0.001	86.035
223	2.166	35.462	0.781	7.95564	1.68409	0.019	5.812	0.031	0.355	0	32.242	0.002	86.5097
228	2.054	35.22	0.924	7.81452	1.65422	0.003	6.051	0.057	0.509	0	32.237	0.065	86.5887
229	2.06	35.006	1.015	7.51128	1.59003	0	6.437	0.023	0.507	0	32.267	0.003	86.4193
230	2.028	35.384	1.031	7.34496	1.55482	0.002	6.479	0.017	0.543	0	31.999	0	86.3828
231	2.319	35.377	0.737	8.17152	1.72979	0.008	6.086	0.272	0.738	0	31.999	0.028	87.4653
232	2.036	35.645	0.972	7.90104	1.67253	0.005	6.034	0.025	0.407	0	32.195	0.026	86.9186
233	2.122	35.281	0.82	7.94556	1.68196	0.036	5.805	0.018	0.427	0	32.508	0.037	86.6815
234	2.075	35.467	0.842	7.80024	1.6512	0.005	5.717	0.048	0.539	0	32.941	0	87.0854
235	1.914	35.237	0.853	7.78764	1.64853	0.013	5.503	0.013	0.491	0	32.964	0	86.4242
236	1.974	35.444	0.779	7.94472	1.68178	0	5.52	0.016	0.47	0	32.802	0.038	86.6695
237	1.816	35.755	0.699	7.72884	1.63608	0.014	5.336	0.258	0.442	0	31.315	0	84.9999
238	2.019	35.068	0.892	8.14548	1.72428	0.003	5.4	0.018	0.511	0	32.239	0	86.0198
239	2.073	35.249	0.897	7.98924	1.6912	0.028	5.655	0.032	0.667	0.038	31.83	0.027	86.1764
240	2.044	35.672	0.389	7.245	1.53366	0.036	4.817	0.06	0.169	0	35.111	0	87.0767
241	2.101	35.442	0.418	7.01652	1.48529	0.031	4.915	0.045	0.287	0	34.73	0.007	86.4778
242	1.938	35.605	0.401	6.99888	1.48156	0.051	4.618	0.021	0.187	0	34.778	0.02	86.0994
245	2.011	35.257	0.411	7.16856	1.51748	0.007	4.72	0.024	0.205	0.007	34.911	0.004	86.243
248	2.043	35.433	0.561	7.68852	1.62755	0.015	5.176	0.031	0.35	0	33.862	0.021	86.8081
252	2.007	35.683	0.412	6.44532	1.36438	0.015	5.216	0.036	0.179	0.007	35.097	0	86.4617
253	2.17	35.6	0.443	6.80988	1.44155	0.015	5.253	0.03	0.131	0	34.978	0.014	86.8854
254	2.424	35.389	0.421	8.63772	1.82848	0.004	5.498	0.04	0.857	0	31.909	0	87.0082
255	2.039	35.746	0.424	7.05264	1.49294	0.042	4.92	0	0.271	0	34.328	0	86.3156
256	2.185	35.991	0.462	7.4172	1.57011	0.031	5.274	0.023	0.307	0	33.07	0	86.3303
257	2.344	36.729	0.411	9.06444	1.91881	0.009	5.196	0.109	0.836	0.035	29.889	0.011	86.5522
258	2.181	35.053	0.604	8.043	1.70258	0.043	5.548	0.019	0.549	0	32.689	0.012	86.4436
260	2.117	36.464	0.631	7.80192	1.65155	0.025	5.563	0.033	0.345	0	32.597	0.024	87.2525
261	2.073	36.025	0.669	7.0266	1.48743	0.013	5.692	0.015	0.256	0	33.601	0.001	86.859
263	2.111	35.671	0.502	7.08456	1.4997	0.001	5.212	0.023	0.187	0	33.993	0	86.2843
264	2.166	35.262	0.546	7.00728	1.48334	0	5.364	0.042	0.238	0	34.117	0.005	86.2306
265	2.294	35.866	0.665	7.72128	1.63448	0.051	5.444	0.043	0.353	0	32.996	0.011	87.0788
266	2.347	35.308	0.619	8.88216	1.88022	0.022	5.461	0.032	0.933	0.042	30.55	0.021	86.0974
267	2.222	35.742	0.93	8.3874	1.77549	0.026	5.893	0.026	0.664	0	31.139	0.053	86.8579
268	1.951	34.963	0.967	8.24292	1.7449	0.013	5.685	0.014	0.549	0	32.152	0.024	86.3058
269	2.186	35.883	0.804	8.27988	1.75273	0.008	5.87	0.01	0.457	0	32.134	0.057	87.4416
270	2.124	35.932	0.525	7.48776	1.58505	0.018	5.462	0.202	0.274	0	33.098	0.001	86.7088
271	2.106	34.812	0.607	7.22568	1.52957	0.05	5.216	0.045	0.174	0	33.339	0	85.1042
272	2.076	35.791	0.963	8.09172	1.7129	0.035	5.852	0.046	0.294	0	32.337	0	87.1986
273	2.154	35.25	0.882	7.60788	1.61048	0.026	5.609	0.03	0.225	0	32.823	0	86.2174
274	2.164	35.62	0.968	7.70364	1.63075	0.01	5.969	0.026	0.312	0	32.397	0.005	86.8054
275	2.035	35.97	1.06	7.93632	1.68	0.006	5.946	0.029	0.276	0	32.133	0.052	87.1233
276	2.073	35.592	0.698	7.72632	1.63555	0.024	5.209	0.053	0.092	0	33.632	0	86.7349
277	2.124	35.429	1.072	8.085	1.71148	0.023	5.886	0.013	0.215	0	31.851	0	86.4095
278	2.117	35.989	1.009	8.2656	1.74971	0.023	5.679	0.051	0.153	0	31.813	0.054	86.9033
279	2.579	35.895	0.567	9.2568	1.95953	0.025	5.482	0.033	0.718	0.062	31.447	0.012	88.0363
282	2.019	35.496	1.179	8.67804	1.83701	0	5.617	0.009	0.439	0	31.285	0	86.5591
283	2.057	35.548	0.786	8.27484	1.75166	0.017	5.058	0.015	0.197	0	33.104	0	86.8085
284	2.039	34.897	1.171	9.05436	1.91667	0.02	5.539	0.014	0.303	0	31.375	0	86.329
285	2.084	35.007	1.197	9.20892	1.94939	0.004	5.689	0.029	0.362	0	30.969	0.049	86.5483
287	2.088	35.259	1.074	8.64192	1.82937	0.054	5.55	0.034	0.235	0	32.607	0	87.3723
288	2.078	35.393	1.195	9.18876	1.94512	0.029	5.904	0.017	0.266	0	31.738	0.004	87.7579
289	2.039	34.453	1.065	8.78052	1.85871	0.039	5.329	0.023	0.24	0	31.682	0	85.5092
290	2.203	36.445	1.14	9.25596	1.95935	0	5.671	0.037	0.388	0	30.589	0.004	87.6923
291	1.952	34.276	1.236	9.46596	2.0038	0.075	5.426	0.056	0.263	0	30.035	0	84.7888
292	2.133	35.765	1.341	8.91324	1.8868	0.027	5.793	0.03	0.388	0	31.617	0	87.894
293	2.268	35.031	0.911	8.35548	1.76873	0.03	5.345	0.029	0.158	0	33.127	0.057	87.0802
294	2.122	34.8	0.924	8.28744	1.75433	0.034	5.46	0.06	0.171	0	32.821	0	86.4338
295	2.204	36.395	0.99	7.99176	1.69174	0.019	5.522	0.039	0.212	0	33.22	0.029	88.3135
296	2.231	35.473	0.81	8.34036	1.76553	0.041	5.491	0.035	0.1	0	32.781	0.034	87.1019
297	2.311	35.107	0.797	8.27148	1.75095	0	5.365	0.03	0.123	0	32.905	0	86.6604
298	2.239	35.764	0.778	8.33112	1.76358	0.019	5.356	0.056	0.115	0	33.064	0	87.4857
300	2.233	35.117	0.735	8.06736	1.70774	0.038	5.401	0.031	0.141	0	33.281	0.004	86.7561
302	2.093	35.031	1.336	9.2064	1.94886	0.028	6.104	0.047	0.758	0	30.614	0.007	87.1733
303	2.727	35.149	0.471	10.5059	2.22394	0.03	5.586	0.059	2.089	0.059	29.038	0.08	88.0178
304	2.208	36.174	0.776	7.7868	1.64835	0.066	5.248	0.04	0.22	0	32.897	0.045	87.1092
306	2.19	35.947	0.914	7.84308	1.66026	0.004	5.353	0.032	0.21	0	32.327	0.031	86.5113
33	3.075	35.485	0.046	9.8868	2.09289	0	6.069	0.069	1.309	0.026	29.795	0.033	87.8867
55	2.203	34.179	1.757	8.84268	1.87186	0.04	7.012	0.025	1.86	0.019	30.375	0.065	88.2495
69	2.47	34.932	0.888	8.81328	1.86564	0.035	5.748	0.022	0.941	0	30.696	0.001	86.4119
72	2.345	35.127	0.92	9.12996	1.93268	0.023	5.23	0.04	1.503	0	32.006	0.029	88.2856
73	2.141	35.232	0.861	9.05184	1.91614	0.012	5.273	0.031	1.885	0	31.496	0.092	87.991
74	2.206	35.535	0.722	8.5134	1.80216	0.03	5.432	0.051	1.701	0	31.194	0.074	87.2606
75	2.005	35.409	0.772	7.3416	1.55411	0.05	5.299	0	0.514	0	34.016	0.02	86.9807
77	2.372	36.661	1.007	9.18456	1.94424	0.041	6.262	0.031	1.577	0.011	29.197	0.115	88.4028
113	2.136	35.215	1.512	9.35844	1.98104	0.017	6.314	0.048	1.832	0.038	29.152	0.01	87.6135
114	2.036	34.159	1.579	8.715	1.84484	0.007	6.533	0.025	1.611	0	30.328	0.045	86.8828
115	1.963	34.877	1.505	8.94264	1.89303	0.04	6.357	0.024	1.429	0.027	29.732	0.065	86.8547
