# Supplementary material for: Dutrowite, Na(Fe2+2.5Ti0.5)Al6(Si6O18)(BO3)3(OH)3O, a new mineral from the Apuan Alps (Tuscany, Italy): the first member of the tourmaline supergroup with Ti as a species-forming chemical constituent
Source: Copernicus journal article supplement (doi:10.5194/ejm-35-81-2023), 2023-02-10
Supplement: Supplementary file 2 [file ejm-35-81-2023-supplement.zip › dutrowite.cif]

 
data_shelx
 
_audit_creation_method            'SHELXL-2018/1'
_shelx_SHELXL_version_number      '2018/1'
_chemical_name_mineral            'dutrowite'
_chemical_compound_source         'Fornovolasco, Apuan Alps, Italy'
_chemical_formula_analytical
;      
Al15.93 B9 Ca0.60 Fe5.10 H10.23 K0.03 Mg4.74  
Na2.43 O93 Si17.46 Ti1.68 V0.06
; 
_chemical_formula_sum
 'Al16.94 H9 B9 Ca0.63 Fe6.08 Mg3.98 Na2.37 O93 Si18' 
_chemical_formula_weight          3072.99

loop_
 _atom_type_symbol
 _atom_type_description
 _atom_type_scat_dispersion_real
 _atom_type_scat_dispersion_imag
 _atom_type_scat_source
 'O'  'O'   0.0106   0.0060
 'International Tables Vol C Tables 4.2.6.8 and 6.1.1.4'
 'B'  'B'   0.0013   0.0007
 'International Tables Vol C Tables 4.2.6.8 and 6.1.1.4'
 'Na'  'Na'   0.0362   0.0249
 'International Tables Vol C Tables 4.2.6.8 and 6.1.1.4'
 'Al'  'Al'   0.0645   0.0514
 'International Tables Vol C Tables 4.2.6.8 and 6.1.1.4'
 'Si'  'Si'   0.0817   0.0704
 'International Tables Vol C Tables 4.2.6.8 and 6.1.1.4'
 'Fe'  'Fe'   0.3463   0.8444
 'International Tables Vol C Tables 4.2.6.8 and 6.1.1.4'
 'Mg'  'Mg'   0.0486   0.0363
 'International Tables Vol C Tables 4.2.6.8 and 6.1.1.4'
 'H'  'H'   0.0000   0.0000
 'International Tables Vol C Tables 4.2.6.8 and 6.1.1.4'
 'Ca'  'Ca'   0.2262   0.3064
 'International Tables Vol C Tables 4.2.6.8 and 6.1.1.4'
 
_space_group_crystal_system       trigonal
_space_group_IT_number            160
_space_group_name_H-M_alt         'R 3 m :H'
_space_group_name_Hall            'R 3 -2"'
 
_shelx_space_group_comment
;
The symmetry employed for this shelxl refinement is uniquely defined
by the following loop, which should always be used as a source of
symmetry information in preference to the above space-group names.
They are only intended as comments.
;
 
loop_
 _space_group_symop_operation_xyz
 'x, y, z'
 '-y, x-y, z'
 '-x+y, -x, z'
 '-y, -x, z'
 '-x+y, y, z'
 'x, x-y, z'
 'x+2/3, y+1/3, z+1/3'
 '-y+2/3, x-y+1/3, z+1/3'
 '-x+y+2/3, -x+1/3, z+1/3'
 '-y+2/3, -x+1/3, z+1/3'
 '-x+y+2/3, y+1/3, z+1/3'
 'x+2/3, x-y+1/3, z+1/3'
 'x+1/3, y+2/3, z+2/3'
 '-y+1/3, x-y+2/3, z+2/3'
 '-x+y+1/3, -x+2/3, z+2/3'
 '-y+1/3, -x+2/3, z+2/3'
 '-x+y+1/3, y+2/3, z+2/3'
 'x+1/3, x-y+2/3, z+2/3'
 
_cell_length_a                    15.9864(8)
_cell_length_b                    15.9864(8)
_cell_length_c                    7.2187(4)
_cell_angle_alpha                 90
_cell_angle_beta                  90
_cell_angle_gamma                 120
_cell_volume                      1597.68(18)
_cell_formula_units_Z             1
_cell_measurement_temperature     293(2)
_cell_measurement_reflns_used     3821
_cell_measurement_theta_min       3.182
_cell_measurement_theta_max       29.978
 
_exptl_crystal_description        'anhedral'
_exptl_crystal_colour             'brown'
_exptl_crystal_density_meas       'not measured'
_exptl_crystal_density_method     ?
_exptl_crystal_density_diffrn     3.194          
_exptl_crystal_F_000              1514.7
_exptl_transmission_factor_min    ?
_exptl_transmission_factor_max    ?
_exptl_crystal_size_max           0.080
_exptl_crystal_size_mid           0.037
_exptl_crystal_size_min           0.030
_exptl_absorpt_coefficient_mu     2.222
_shelx_estimated_absorpt_T_min    0.822
_shelx_estimated_absorpt_T_max    0.927
_exptl_absorpt_correction_type    'multi-scan'
_exptl_absorpt_correction_T_min   0.906
_exptl_absorpt_correction_T_max   0.936
_exptl_absorpt_process_details    'SADABS (Sheldrick, 2015)'
_exptl_absorpt_special_details    ?
_diffrn_ambient_temperature       293(2)
_diffrn_radiation_wavelength      0.71073
_diffrn_radiation_type            MoK\a
_diffrn_radiation_source          'fine-focus sealed tube'
_diffrn_radiation_monochromator   graphite
_diffrn_measurement_device_type   'Bruker Smart Breeze'
_diffrn_reflns_number             7319
_diffrn_reflns_av_unetI/netI      0.0327
_diffrn_reflns_av_R_equivalents   0.0441
_diffrn_reflns_limit_h_min        -22
_diffrn_reflns_limit_h_max        20
_diffrn_reflns_limit_k_min        -17
_diffrn_reflns_limit_k_max        22
_diffrn_reflns_limit_l_min        -10
_diffrn_reflns_limit_l_max        10
_diffrn_reflns_theta_min          2.548
_diffrn_reflns_theta_max          29.991
_diffrn_reflns_theta_full         25.242
_diffrn_measured_fraction_theta_max   1.000
_diffrn_measured_fraction_theta_full  1.000
_diffrn_reflns_Laue_measured_fraction_max    1.000
_diffrn_reflns_Laue_measured_fraction_full   1.000
_diffrn_reflns_point_group_measured_fraction_max   1.000
_diffrn_reflns_point_group_measured_fraction_full  1.000
_reflns_number_total              1145
_reflns_number_gt                 1095
_reflns_threshold_expression      'I > 2\s(I)'
_reflns_Friedel_coverage          0.981
_reflns_Friedel_fraction_max      1.000
_reflns_Friedel_fraction_full     1.000
 
_reflns_special_details
;
 Reflections were merged by SHELXL according to the crystal
 class for the calculation of statistics and refinement.
 
 _reflns_Friedel_fraction is defined as the number of unique
 Friedel pairs measured divided by the number that would be
 possible theoretically, ignoring centric projections and
 systematic absences.
;
 
_computing_data_collection      'Apex3 (Bruker AXS Inc., 2016)'
_computing_cell_refinement      'Apex3 (Bruker AXS Inc., 2016)'
_computing_data_reduction       'Apex3 (Bruker AXS Inc., 2016)'
_computing_structure_refinement 'SHELXL-2018/1 (Sheldrick, 2018)'
_computing_molecular_graphics     ?
_computing_publication_material   ?
_refine_special_details
;
 Refined as a 2-component inversion twin.
;
_refine_ls_structure_factor_coef  Fsqd
_refine_ls_matrix_type            full
_refine_ls_weighting_scheme       calc
_refine_ls_weighting_details
'w=1/[\s^2^(Fo^2^)+(0.0043P)^2^+3.6400P] where P=(Fo^2^+2Fc^2^)/3'
_atom_sites_solution_primary      ?
_atom_sites_solution_secondary    ?
_atom_sites_solution_hydrogens    difmap
_refine_ls_hydrogen_treatment     refxyz
_refine_ls_extinction_method      'SHELXL-2018/1 (Sheldrick 2018)'
_refine_ls_extinction_coef        0.00028(14)
_refine_ls_extinction_expression
 'Fc^*^=kFc[1+0.001xFc^2^\l^3^/sin(2\q)]^-1/4^'
_refine_ls_abs_structure_details
;
 Refined as an inversion twin.
;
_refine_ls_abs_structure_Flack    0.18(4)
_chemical_absolute_configuration  ?
_refine_ls_number_reflns          1145
_refine_ls_number_parameters      94
_refine_ls_number_restraints      1
_refine_ls_R_factor_all           0.0290
_refine_ls_R_factor_gt            0.0257
_refine_ls_wR_factor_ref          0.0457
_refine_ls_wR_factor_gt           0.0448
_refine_ls_goodness_of_fit_ref    1.138
_refine_ls_restrained_S_all       1.137
_refine_ls_shift/su_max           0.000
_refine_ls_shift/su_mean          0.000
 
loop_
 _atom_site_label
 _atom_site_type_symbol
 _atom_site_fract_x
 _atom_site_fract_y
 _atom_site_fract_z
 _atom_site_U_iso_or_equiv
 _atom_site_adp_type
 _atom_site_occupancy
 _atom_site_site_symmetry_order  
 _atom_site_calc_flag
 _atom_site_refinement_flags_posn
 _atom_site_refinement_flags_adp
 _atom_site_refinement_flags_occupancy
 _atom_site_disorder_assembly
 _atom_site_disorder_group
Na Na 0.000000 0.000000 0.2261(5) 0.0222(15) Uani 0.79(3) 6 d S T P . .
Ca Ca 0.000000 0.000000 0.2261(5) 0.0222(15) Uani 0.21(3) 6 d S T P . .
YMG Mg 0.12384(8) 0.06192(4) 0.6339(2) 0.0104(3) Uani 0.443(8) 2 d S T P . .
YFE Fe 0.12384(8) 0.06192(4) 0.6339(2) 0.0104(3) Uani 0.557(8) 2 d S T P . .
ZAL Al 0.29846(8) 0.26189(8) 0.6113(2) 0.0079(3) Uani 0.941(6) 1 d . . P . .
ZFE Fe 0.29846(8) 0.26189(8) 0.6113(2) 0.0079(3) Uani 0.059(6) 1 d . . P . .
B B 0.1105(2) 0.2210(5) 0.4537(9) 0.0107(11) Uani 1 2 d S T P . .
T Si 0.19173(7) 0.18988(7) 0.000000 0.0070(2) Uani 1 1 d . . . . .
O1 O 0.000000 0.000000 0.7818(11) 0.0229(17) Uani 1 6 d S T P . .
O2 O 0.06112(14) 0.1222(3) 0.4815(5) 0.0132(8) Uani 1 2 d S T P . .
O3 O 0.2665(3) 0.13327(15) 0.5115(5) 0.0130(8) Uani 1 2 d DS T P . .
H3 H 0.257(5) 0.129(2) 0.380(4) 0.016 Uiso 1 2 d DS U P . .
O4 O 0.09235(14) 0.1847(3) 0.0710(5) 0.0125(8) Uani 1 2 d S T P . .
O5 O 0.1841(3) 0.09206(14) 0.0896(5) 0.0110(8) Uani 1 2 d S T P . .
O6 O 0.19608(19) 0.18670(19) 0.7785(4) 0.0097(5) Uani 1 1 d . . . . .
O7 O 0.28443(18) 0.28402(17) 0.0791(4) 0.0099(6) Uani 1 1 d . . . . .
O8 O 0.20944(19) 0.2701(2) 0.4412(4) 0.0119(6) Uani 1 1 d . . . . .
 
loop_
 _atom_site_aniso_label
 _atom_site_aniso_U_11
 _atom_site_aniso_U_22
 _atom_site_aniso_U_33
 _atom_site_aniso_U_23
 _atom_site_aniso_U_13
 _atom_site_aniso_U_12
Na 0.0222(17) 0.0222(17) 0.022(2) 0.000 0.000 0.0111(9)
Ca 0.0222(17) 0.0222(17) 0.022(2) 0.000 0.000 0.0111(9)
YMG 0.0109(6) 0.0077(4) 0.0135(6) -0.0019(2) -0.0038(4) 0.0055(3)
YFE 0.0109(6) 0.0077(4) 0.0135(6) -0.0019(2) -0.0038(4) 0.0055(3)
ZAL 0.0078(6) 0.0080(6) 0.0078(5) 0.0002(4) -0.0006(4) 0.0039(4)
ZFE 0.0078(6) 0.0080(6) 0.0078(5) 0.0002(4) -0.0006(4) 0.0039(4)
B 0.008(2) 0.012(3) 0.013(3) 0.001(2) 0.0004(11) 0.0060(14)
T 0.0066(5) 0.0066(5) 0.0076(4) -0.0008(4) -0.0004(4) 0.0031(4)
O1 0.026(3) 0.026(3) 0.016(4) 0.000 0.000 0.0131(13)
O2 0.0163(16) 0.0086(18) 0.0121(19) 0.0013(15) 0.0007(7) 0.0043(9)
O3 0.021(2) 0.0151(15) 0.0049(17) -0.0001(7) -0.0002(15) 0.0105(11)
O4 0.0098(14) 0.017(2) 0.0132(18) -0.0010(15) -0.0005(8) 0.0084(11)
O5 0.016(2) 0.0087(13) 0.0109(17) 0.0001(7) 0.0002(14) 0.0080(10)
O6 0.0119(14) 0.0104(13) 0.0073(11) -0.0019(10) 0.0000(10) 0.0060(11)
O7 0.0093(13) 0.0076(13) 0.0100(12) -0.0004(10) -0.0013(10) 0.0022(11)
O8 0.0074(13) 0.0122(14) 0.0164(14) 0.0025(10) 0.0002(11) 0.0051(11)
 
_geom_special_details
;
 All esds (except the esd in the dihedral angle between two l.s. planes)
 are estimated using the full covariance matrix.  The cell esds are taken
 into account individually in the estimation of esds in distances, angles
 and torsion angles; correlations between esds in cell parameters are only
 used when they are defined by crystal symmetry.  An approximate (isotropic)
 treatment of cell esds is used for estimating esds involving l.s. planes.
;
 
loop_
 _geom_bond_atom_site_label_1
 _geom_bond_atom_site_label_2
 _geom_bond_distance
 _geom_bond_site_symmetry_2
 _geom_bond_publ_flag
Na O2 2.503(5) . ?
Na O2 2.503(5) 3 ?
Na O2 2.503(5) 2 ?
Na O5 2.733(4) 3 ?
Na O5 2.733(4) 2 ?
Na O5 2.733(4) . ?
Na O4 2.791(4) 3 ?
Na O4 2.791(4) . ?
Na O4 2.791(4) 2 ?
Na YMG 3.407(3) 2 ?
Na YMG 3.407(3) . ?
YMG O1 2.020(4) . ?
YMG O6 2.024(3) 6 ?
YMG O6 2.024(3) . ?
YMG O2 2.028(3) 3 ?
YMG O2 2.028(3) . ?
YMG O3 2.164(4) . ?
YMG YMG 2.9697(19) 2 ?
YMG YMG 2.9698(19) 3 ?
YMG ZAL 3.0190(15) . ?
YMG ZAL 3.0191(15) 6 ?
YMG T 3.1822(13) 6_556 ?
ZAL O8 1.899(3) 8 ?
ZAL O6 1.901(3) . ?
ZAL O7 1.909(3) 8 ?
ZAL O8 1.933(3) . ?
ZAL O7 1.971(3) 15 ?
ZAL O3 1.9895(19) . ?
ZAL ZAL 2.9539(11) 8 ?
ZAL ZAL 2.9539(11) 15_554 ?
B O8 1.373(4) 5 ?
B O8 1.373(4) . ?
B O2 1.382(8) . ?
T O7 1.599(3) . ?
T O6 1.603(3) 1_554 ?
T O4 1.6316(16) . ?
T O5 1.6398(18) . ?
O3 H3 0.96(3) . ?
 
loop_
 _geom_angle_atom_site_label_1
 _geom_angle_atom_site_label_2
 _geom_angle_atom_site_label_3
 _geom_angle
 _geom_angle_site_symmetry_1
 _geom_angle_site_symmetry_3
 _geom_angle_publ_flag
O2 Na O2 71.69(17) . 3 ?
O2 Na O2 71.69(17) . 2 ?
O2 Na O2 71.69(17) 3 2 ?
O2 Na O5 153.68(17) . 3 ?
O2 Na O5 87.14(9) 3 3 ?
O2 Na O5 87.14(9) 2 3 ?
O2 Na O5 87.14(9) . 2 ?
O2 Na O5 153.68(17) 3 2 ?
O2 Na O5 87.14(9) 2 2 ?
O5 Na O5 107.76(11) 3 2 ?
O2 Na O5 87.14(9) . . ?
O2 Na O5 87.14(9) 3 . ?
O2 Na O5 153.68(17) 2 . ?
O5 Na O5 107.76(11) 3 . ?
O5 Na O5 107.76(11) 2 . ?
O2 Na O4 127.24(7) . 3 ?
O2 Na O4 71.10(12) 3 3 ?
O2 Na O4 127.24(7) 2 3 ?
O5 Na O4 55.12(4) 3 3 ?
O5 Na O4 135.23(17) 2 3 ?
O5 Na O4 55.12(4) . 3 ?
O2 Na O4 71.09(12) . . ?
O2 Na O4 127.24(7) 3 . ?
O2 Na O4 127.24(7) 2 . ?
O5 Na O4 135.23(17) 3 . ?
O5 Na O4 55.12(4) 2 . ?
O5 Na O4 55.12(4) . . ?
O4 Na O4 104.99(11) 3 . ?
O2 Na O4 127.24(7) . 2 ?
O2 Na O4 127.24(7) 3 2 ?
O2 Na O4 71.10(12) 2 2 ?
O5 Na O4 55.13(4) 3 2 ?
O5 Na O4 55.12(4) 2 2 ?
O5 Na O4 135.23(17) . 2 ?
O4 Na O4 105.00(11) 3 2 ?
O4 Na O4 104.99(11) . 2 ?
O2 Na YMG 36.22(7) . 2 ?
O2 Na YMG 72.77(13) 3 2 ?
O2 Na YMG 36.22(7) 2 2 ?
O5 Na YMG 123.11(9) 3 2 ?
O5 Na YMG 80.91(9) 2 2 ?
O5 Na YMG 123.11(9) . 2 ?
O4 Na YMG 143.86(12) 3 2 ?
O4 Na YMG 96.66(8) . 2 ?
O4 Na YMG 96.66(8) 2 2 ?
O2 Na YMG 36.22(7) . . ?
O2 Na YMG 36.22(7) 3 . ?
O2 Na YMG 72.77(13) 2 . ?
O5 Na YMG 123.11(9) 3 . ?
O5 Na YMG 123.11(9) 2 . ?
O5 Na YMG 80.91(9) . . ?
O4 Na YMG 96.66(8) 3 . ?
O4 Na YMG 96.66(8) . . ?
O4 Na YMG 143.86(12) 2 . ?
YMG Na YMG 51.68(6) 2 . ?
O1 YMG O6 98.45(15) . 6 ?
O1 YMG O6 98.45(15) . . ?
O6 YMG O6 88.87(16) 6 . ?
O1 YMG O2 85.59(15) . 3 ?
O6 YMG O2 89.15(13) 6 3 ?
O6 YMG O2 175.73(14) . 3 ?
O1 YMG O2 85.59(15) . . ?
O6 YMG O2 175.73(14) 6 . ?
O6 YMG O2 89.15(13) . . ?
O2 YMG O2 92.6(2) 3 . ?
O1 YMG O3 172.2(2) . . ?
O6 YMG O3 76.08(11) 6 . ?
O6 YMG O3 76.08(11) . . ?
O2 YMG O3 99.76(11) 3 . ?
O2 YMG O3 99.76(11) . . ?
O1 YMG YMG 42.68(12) . 2 ?
O6 YMG YMG 141.06(8) 6 2 ?
O6 YMG YMG 94.46(8) . 2 ?
O2 YMG YMG 89.46(10) 3 2 ?
O2 YMG YMG 42.93(8) . 2 ?
O3 YMG YMG 142.24(6) . 2 ?
O1 YMG YMG 42.68(12) . 3 ?
O6 YMG YMG 94.46(8) 6 3 ?
O6 YMG YMG 141.07(8) . 3 ?
O2 YMG YMG 42.93(8) 3 3 ?
O2 YMG YMG 89.46(10) . 3 ?
O3 YMG YMG 142.24(6) . 3 ?
YMG YMG YMG 60.0 2 3 ?
O1 YMG ZAL 135.09(10) . . ?
O6 YMG ZAL 92.86(9) 6 . ?
O6 YMG ZAL 38.24(8) . . ?
O2 YMG ZAL 138.14(9) 3 . ?
O2 YMG ZAL 83.25(10) . . ?
O3 YMG ZAL 41.15(5) . . ?
YMG YMG ZAL 113.28(2) 2 . ?
YMG YMG ZAL 172.64(2) 3 . ?
O1 YMG ZAL 135.10(10) . 6 ?
O6 YMG ZAL 38.24(8) 6 6 ?
O6 YMG ZAL 92.86(9) . 6 ?
O2 YMG ZAL 83.25(10) 3 6 ?
O2 YMG ZAL 138.14(9) . 6 ?
O3 YMG ZAL 41.15(5) . 6 ?
YMG YMG ZAL 172.64(2) 2 6 ?
YMG YMG ZAL 113.28(2) 3 6 ?
ZAL YMG ZAL 73.25(5) . 6 ?
O1 YMG T 79.15(16) . 6_556 ?
O6 YMG T 25.21(7) 6 6_556 ?
O6 YMG T 75.91(8) . 6_556 ?
O2 YMG T 103.63(11) 3 6_556 ?
O2 YMG T 156.68(10) . 6_556 ?
O3 YMG T 93.98(9) . 6_556 ?
YMG YMG T 119.47(3) 2 6_556 ?
YMG YMG T 91.12(3) 3 6_556 ?
ZAL YMG T 95.17(4) . 6_556 ?
ZAL YMG T 61.74(3) 6 6_556 ?
O8 ZAL O6 94.29(12) 8 . ?
O8 ZAL O7 96.31(12) 8 8 ?
O6 ZAL O7 169.38(13) . 8 ?
O8 ZAL O8 172.05(11) 8 . ?
O6 ZAL O8 90.91(12) . . ?
O7 ZAL O8 78.63(11) 8 . ?
O8 ZAL O7 77.92(11) 8 15 ?
O6 ZAL O7 92.11(12) . 15 ?
O7 ZAL O7 90.81(5) 8 15 ?
O8 ZAL O7 95.90(12) . 15 ?
O8 ZAL O3 95.27(14) 8 . ?
O6 ZAL O3 83.19(15) . . ?
O7 ZAL O3 95.10(14) 8 . ?
O8 ZAL O3 91.30(14) . . ?
O7 ZAL O3 171.47(13) 15 . ?
O8 ZAL ZAL 40.00(9) 8 8 ?
O6 ZAL ZAL 85.09(8) . 8 ?
O7 ZAL ZAL 103.55(10) 8 8 ?
O8 ZAL ZAL 134.90(10) . 8 ?
O7 ZAL ZAL 39.66(8) 15 8 ?
O3 ZAL ZAL 132.41(11) . 8 ?
O8 ZAL ZAL 134.24(10) 8 15_554 ?
O6 ZAL ZAL 128.93(10) . 15_554 ?
O7 ZAL ZAL 41.22(8) 8 15_554 ?
O8 ZAL ZAL 39.17(8) . 15_554 ?
O7 ZAL ZAL 85.30(9) 15 15_554 ?
O3 ZAL ZAL 103.20(10) . 15_554 ?
ZAL ZAL ZAL 119.69(5) 8 15_554 ?
O8 ZAL YMG 110.32(9) 8 . ?
O6 ZAL YMG 41.25(8) . . ?
O7 ZAL YMG 132.69(9) 8 . ?
O8 ZAL YMG 77.51(9) . . ?
O7 ZAL YMG 131.76(9) 15 . ?
O3 ZAL YMG 45.70(12) . . ?
ZAL ZAL YMG 122.15(4) 8 . ?
ZAL ZAL YMG 112.56(5) 15_554 . ?
O8 B O8 120.1(6) 5 . ?
O8 B O2 120.0(3) 5 . ?
O8 B O2 120.0(3) . . ?
O7 T O6 110.60(14) . 1_554 ?
O7 T O4 110.87(17) . . ?
O6 T O4 111.62(16) 1_554 . ?
O7 T O5 110.40(17) . . ?
O6 T O5 110.32(16) 1_554 . ?
O4 T O5 102.8(2) . . ?
O7 T YMG 139.40(11) . 1_554 ?
O6 T YMG 32.56(10) 1_554 1_554 ?
O4 T YMG 102.58(13) . 1_554 ?
O5 T YMG 82.87(12) . 1_554 ?
O7 T Na 130.91(11) . . ?
O6 T Na 118.45(11) 1_554 . ?
O4 T Na 52.72(14) . . ?
O5 T Na 50.68(14) . . ?
YMG T Na 87.71(6) 1_554 . ?
YMG O1 YMG 94.6(2) 2 . ?
YMG O1 YMG 94.6(2) 2 3 ?
YMG O1 YMG 94.6(2) . 3 ?
B O2 YMG 119.1(2) . 2 ?
B O2 YMG 119.1(2) . . ?
YMG O2 YMG 94.15(17) 2 . ?
B O2 Na 124.2(3) . . ?
YMG O2 Na 96.96(14) 2 . ?
YMG O2 Na 96.96(14) . . ?
ZAL O3 ZAL 129.7(2) . 6 ?
ZAL O3 YMG 93.15(13) . . ?
ZAL O3 YMG 93.16(13) 6 . ?
ZAL O3 H3 112.9(7) . . ?
ZAL O3 H3 112.9(7) 6 . ?
YMG O3 H3 106(4) . . ?
T O4 T 143.0(3) 5 . ?
T O4 Na 99.57(14) 5 . ?
T O4 Na 99.57(14) . . ?
T O5 T 132.9(2) . 6 ?
T O5 Na 101.67(15) . . ?
T O5 Na 101.67(15) 6 . ?
T O6 ZAL 130.60(16) 1_556 . ?
T O6 YMG 122.23(15) 1_556 . ?
ZAL O6 YMG 100.51(12) . . ?
T O7 ZAL 130.72(17) . 15_554 ?
T O7 ZAL 127.01(15) . 8_554 ?
ZAL O7 ZAL 99.11(11) 15_554 8_554 ?
B O8 ZAL 132.4(3) . 15_554 ?
B O8 ZAL 126.6(3) . . ?
ZAL O8 ZAL 100.83(13) 15_554 . ?
 
_refine_diff_density_max    0.475
_refine_diff_density_min   -0.416
_refine_diff_density_rms    0.086

_shelx_res_file
;
TITL Ti-tur in R3m
    shelx.res
    created by SHELXL-2018/1 at 15:00:27 on 01-Aug-2019
CELL   0.71073  15.9864  15.9864   7.2187  90.000  90.000 120.000
ZERR     1       0.0008   0.0008   0.0004   0.000   0.000   0.000
LATT -3
SYMM -Y, X-Y, Z
SYMM -X+Y, -X, Z
SYMM -Y, -X, Z
SYMM -X+Y, Y, Z
SYMM X, X-Y, Z
SFAC O 3.7504 16.5151 2.8429 6.5920 1.5430 0.3192 1.6209 43.3486 0.2421 =
     O 0.008 0.006 90 0.66 15.999
SFAC B Na Al Si Fe Mg H Ca
UNIT 93 9 2.37 16.94 18 6.08 3.98 9 0.63
SIZE 0.030 0.037 0.080
MERG 2
L.S. 10
ACTA
BOND 0.5
BOND $H
DFIX 0.97 O3 H3
HTAB
LIST -1 -1
FMAP 2
PLAN 20
EXYZ YMG YFE
EADP YMG YFE
EXYZ ZAL ZFE
EADP ZAL ZFE
EXYZ NA CA
EADP NA CA
TWIN
WGHT    0.004300    3.640000
EXTI    0.000284
BASF   0.17743
FVAR       0.21979   0.44280   0.78849   0.94110
NA    3    0.000000    0.000000    0.226098    30.16667    0.02217    0.02217 =
         0.02236    0.00000    0.00000    0.01109
CA    9    0.000000    0.000000    0.226098   -30.16667    0.02217    0.02217 =
         0.02236    0.00000    0.00000    0.01109
YMG   7    0.123845    0.061922    0.633895    20.50000    0.01094    0.00772 =
         0.01347   -0.00191   -0.00381    0.00547
YFE   6    0.123845    0.061922    0.633895   -20.50000    0.01094    0.00772 =
         0.01347   -0.00191   -0.00381    0.00547
ZAL   4    0.298458    0.261892    0.611335    41.00000    0.00778    0.00802 =
         0.00778    0.00024   -0.00056    0.00391
ZFE   6    0.298458    0.261892    0.611335   -41.00000    0.00778    0.00802 =
         0.00778    0.00024   -0.00056    0.00391
B     2    0.110490    0.220980    0.453673    10.50000    0.00796    0.01202 =
         0.01344    0.00079    0.00040    0.00601
T     5    0.191729    0.189881   10.000000    11.00000    0.00661    0.00659 =
         0.00763   -0.00076   -0.00041    0.00311
O1    1    0.000000    0.000000    0.781769    10.16667    0.02625    0.02625 =
         0.01608    0.00000    0.00000    0.01313
O2    1    0.061118    0.122236    0.481503    10.50000    0.01633    0.00863 =
         0.01207    0.00134    0.00067    0.00431
O3    1    0.266535    0.133268    0.511544    10.50000    0.02096    0.01506 =
         0.00489   -0.00010   -0.00020    0.01048
H3    8    0.257331    0.128666    0.380236    10.50000   -1.20000
O4    1    0.092350    0.184700    0.071017    10.50000    0.00981    0.01680 =
         0.01318   -0.00096   -0.00048    0.00840
O5    1    0.184114    0.092057    0.089643    10.50000    0.01590    0.00869 =
         0.01087    0.00011    0.00023    0.00795
O6    1    0.196077    0.186696    0.778479    11.00000    0.01190    0.01041 =
         0.00730   -0.00188    0.00004    0.00595
O7    1    0.284435    0.284022    0.079126    11.00000    0.00930    0.00759 =
         0.01005   -0.00041   -0.00134    0.00221
O8    1    0.209435    0.270070    0.441175    11.00000    0.00741    0.01215 =
         0.01635    0.00246    0.00019    0.00515

HKLF 4


REM  Ti-tur in R3m
REM R1 =  0.0257 for    1095 Fo > 4sig(Fo)  and  0.0290 for all    1145 data
REM     94 parameters refined using      1 restraints

END

WGHT      0.0043      3.6399

REM Instructions for potential hydrogen bonds
HTAB O3 O5

REM Highest difference peak  0.475,  deepest hole -0.416,  1-sigma level  0.086
Q1    1   0.0000  0.0000  0.4425  10.16667  0.05    0.47
Q2    1   0.0405  0.0202  0.9522  10.50000  0.05    0.39
Q3    1   0.1648  0.3296  0.6384  10.50000  0.05    0.38
Q4    1   0.1219  0.2438  0.7145  10.50000  0.05    0.38
Q5    1   0.3369  0.1684  0.0525  10.50000  0.05    0.37
Q6    1   0.1618  0.3235  0.3700  10.50000  0.05    0.36
Q7    1   0.1363  0.2725  0.3185  10.50000  0.05    0.34
Q8    1   0.3291  0.1646  0.3014  10.50000  0.05    0.33
Q9    1   0.1740  0.2790  0.6254  11.00000  0.05    0.32
Q10   1   0.2064  0.1032  0.5965  10.50000  0.05    0.31
Q11   1   0.1397  0.2794  0.8049  10.50000  0.05    0.31
Q12   1   0.1362  0.2725  0.5741  10.50000  0.05    0.31
Q13   1   0.0556 -0.0048  0.6300  11.00000  0.05    0.31
Q14   1   0.3305  0.2703  0.6956  11.00000  0.05    0.30
Q15   1   0.0344  0.0687  0.8818  10.50000  0.05    0.29
Q16   1   0.1922  0.2853  0.2625  11.00000  0.05    0.29
Q17   1   0.2193  0.3250  0.3453  11.00000  0.05    0.29
Q18   1   0.3205  0.0962  0.2802  11.00000  0.05    0.29
Q19   1   0.2607  0.0750  0.5049  11.00000  0.05    0.29
Q20   1   0.1063  0.2126  0.3792  10.50000  0.05    0.28
;
_shelx_res_checksum   57709

_shelx_hkl_file
;
  -2   1   0 -0.2362 1.24027   3
  -2   1   0 -0.2588 1.58834   1
   1   1   0 3.95209 2.02317   1
   1   1   0 -0.2208 1.10111   2
  -2   1   0 -0.2859 1.33299   2
   2  -1   0 -0.4009 1.41776   2
   2  -1   0 6.48690 2.17957   1
  -1  -1   0 1.16525 1.70197   1
   0   3   0 482.509 19.1041   3
   3  -3   0 538.754 20.6800   1
   0   3   0 513.651 19.8335   1
  -3   0   0 479.922 19.4424   2
   3   0   0 516.492 20.5681   1
   3   0   0 499.913 19.5177   2
  -3   0   0 532.510 21.4896   1
  -4   2   0 2389.49 82.5670   2
  -4   2   0 2285.41 83.4898   1
   2   2   0 2585.60 83.1218   1
   2   2   0 2301.39 82.0902   2
  -4   2   0 2321.47 82.5893   3
  -2  -2   0 2241.91 81.9343   2
   4  -2   0 2246.47 83.3234   2
  -2   4   0 2086.08 83.5083   1
   4  -2   0 2288.59 83.4629   1
  -5   1   0 331.819 17.9656   1
   1   4   0 288.035 16.0109   1
  -5   4   0 333.770 16.1149   3
  -5   4   0 367.534 14.9404   2
  -5   4   0 350.259 17.6737   1
  -5   1   0 309.491 15.2805   2
  -5   1   0 290.421 15.4998   3
   4   1   0 339.319 15.0579   2
   4   1   0 347.228 17.3223   1
   4  -5   0 311.156 16.8982   1
   1  -5   0 373.729 15.9067   1
  -1   5   0 309.908 15.6746   1
  -4   5   0 368.091 17.2884   1
  -4   5   0 354.137 14.0511   2
   5  -1   0 368.901 15.5314   2
  -4  -1   0 316.297 17.7028   1
   5  -4   0 319.010 17.1296   1
  -4   5   0 349.618 16.5946   3
   5  -1   0 379.738 17.5453   1
   5  -4   0 317.936 14.6488   2
  -1   5   0 336.148 15.8751   3
  -1  -4   0 347.539 15.9849   1
   3   3   0 11.1514 7.21775   1
  -6   3   0 20.8924 8.23643   1
  -6   3   0 20.2028 5.70379   2
  -6   3   0 22.8807 5.88063   3
   3   3   0 17.3030 4.88052   2
  -3  -3   0 18.0191 4.49252   2
  -3  -3   0 5.37393 6.62144   1
   6  -3   0 27.6436 5.58181   2
   6  -3   0 20.1564 7.14456   1
  -3   6   0 20.6866 7.25480   1
  -3   6   0 11.2528 5.42840   3
   0   6   0 298.235 14.2190   3
   6  -6   0 284.310 17.1512   1
   6   0   0 341.275 15.4413   2
   6  -6   0 284.961 13.7243   2
   0   6   0 313.933 15.8050   1
  -6   0   0 321.108 16.1071   2
  -6   0   0 301.480 18.2426   1
  -6   6   0 334.975 14.4492   2
  -6   6   0 325.202 16.4409   3
   6   0   0 354.853 17.6818   1
  -6   6   0 342.091 18.0580   1
   0  -6   0 343.098 15.7517   1
   2   5   0 114.630 7.98808   2
   5   2   0 111.655 12.0223   1
  -7   5   0 123.393 9.68410   2
  -7   5   0 145.692 13.3444   1
   2   5   0 110.290 11.5951   1
   5   2   0 107.512 9.60448   2
  -7   5   0 114.832 10.4870   3
  -5   7   0 118.357 11.1065   3
   7  -5   0 137.457 9.27704   2
  -5   7   0 125.896 12.2637   1
  -5   7   0 130.329 7.77279   2
   7  -5   0 124.395 12.1539   1
  -5   7   0 122.743 9.83707   3
  -2  -5   0 107.696 10.6729   1
  -5  -2   0 104.084 12.9132   1
  -8   4   0 764.652 32.9355   1
  -8   4   0 760.244 30.4543   3
   4   4   0 733.011 29.3892   2
  -8   4   0 739.317 30.2032   2
   4   4   0 750.750 31.4721   1
  -4   8   0 736.141 30.9402   3
  -4   8   0 763.259 31.5940   1
  -4   8   0 768.715 30.8099   3
   8  -4   0 745.460 32.4451   1
   8  -4   0 760.681 29.9691   2
  -4  -4   0 759.969 31.6284   1
  -8   7   0 137.939 14.5380   1
  -8   1   0 104.451 14.7950   1
  -8   7   0 130.262 9.99605   2
   1   7   0 87.2146 11.4972   1
   7  -8   0 128.878 12.8938   1
  -8   1   0 107.758 10.9616   2
   7   1   0 96.9812 10.3484   2
  -8   7   0 118.172 11.6634   3
   7   1   0 109.987 13.4766   1
  -7  -1   0 105.112 10.1488   2
  -1   8   0 97.9080 11.0773   1
  -7   8   0 113.336 11.7581   3
  -7   8   0 141.322 14.2493   1
  -1   8   0 82.4744 9.21145   3
   8  -7   0 114.354 12.5678   2
   8  -1   0 98.5245 10.6964   2
  -7   8   0 126.967 9.13690   2
   8  -7   0 130.379 13.1835   1
  -1  -7   0 83.8139 10.8013   1
  -7   8   0 139.327 10.6612   3
   8  -1   0 88.1680 12.8724   1
  -7  -1   0 105.290 14.3289   1
  -1   8   0 86.3550 10.0910   3
  -9   3   0 59.9859 8.24574   2
  -9   6   0 39.2426 8.32773   3
  -9   3   0 43.0058 10.1836   1
  -9   6   0 47.2449 10.5808   1
   6   3   0 23.5614 8.93229   1
  -9   6   0 44.2607 7.54648   2
   3   6   0 36.1302 8.65898   1
  -9   3   0 62.1241 7.50163   3
   6   3   0 39.3181 7.23951   2
   9  -6   0 42.6537 10.4845   1
  -3   9   0 51.0785 8.19618   1
  -6   9   0 45.2348 9.42274   1
   9  -3   0 46.0404 7.58978   2
  -3  -6   0 23.3502 7.84805   1
  -3   9   0 48.4119 7.59922   3
  -6  -3   0 33.8972 6.25482   2
   9  -6   0 49.9899 8.16158   2
  -6   9   0 33.2857 8.53587   3
  -3   9   0 48.9486 8.19913   3
  -6  -3   0 24.6056 9.38285   1
   9  -9   0 1247.00 50.5185   1
   0   9   0 1215.41 47.1036   3
   0   9   0 1181.35 47.0379   3
  -9   9   0 1314.39 47.3837   2
   9   0   0 1286.06 48.4826   2
   9  -9   0 1225.12 46.1174   2
  -9   0   0 1272.29 51.5426   1
  -9   0   0 1111.66 53.5693   2
   9  -9   0 1343.99 46.9857   2
  -9   9   0 1226.90 56.6160   3
   9   0   0 1222.09 50.3765   1
  -9   9   0 1223.18 48.9756   3
   0   9   0 1200.89 48.5850   1
   0  -9   0 1252.93 48.4198   1
  -9   9   0 1283.38 51.0453   1
 -10   5   0 5446.40 193.854   3
 -10   5   0 5558.22 196.308   1
   5   5   0 5280.48 194.299   1
   5   5   0 5361.76 192.685   2
 -10   5   0 5436.02 193.502   2
  -5  10   0 5480.39 194.678   1
  -5  10   0 5467.15 194.633   1
  10  -5   0 5286.95 195.660   1
  -5  10   0 5464.41 194.387   3
  10  -5   0 5236.00 193.613   2
  -5  10   0 5397.38 194.344   3
  -5  -5   0 5407.98 194.502   1
   8   2   0 566.425 31.4034   1
 -10   8   0 602.645 28.1462   3
 -10   2   0 615.913 26.9567   2
   2   8   0 576.459 27.8117   1
   2   8   0 581.443 24.4580   2
 -10   8   0 551.492 26.5486   3
   8   2   0 600.473 27.0024   2
 -10   2   0 624.814 31.0775   1
 -10   8   0 602.715 26.2338   2
  -2  10   0 625.106 27.4768   1
  -2  10   0 647.964 26.5719   3
  10  -2   0 632.819 29.6988   1
  -8  10   0 620.794 29.7254   1
  -2  -8   0 586.248 26.9682   1
  10  -2   0 649.728 27.1110   2
  -8  10   0 613.712 30.4957   3
  -8  -2   0 530.820 25.6668   2
  -2  10   0 632.140 26.7396   3
  10  -8   0 570.738 29.0957   1
  -8  10   0 575.152 27.3576   3
  -8  -2   0 576.178 29.9492   1
  -8  10   0 632.911 25.0788   2
 -11   4   0 995.988 40.5306   2
 -11   7   0 1015.35 41.2902   3
 -11   4   0 981.298 44.0190   1
 -11   4   0 919.528 38.9355   3
   4   7   0 986.378 41.3989   1
 -11   7   0 1006.89 40.3001   2
 -11   4   0 983.807 39.8894   3
 -11   7   0 1030.32 44.4867   1
   7   4   0 1005.79 39.9416   2
 -11   7   0 952.521 40.0311   3
  -4  11   0 989.027 40.4232   3
  -4  -7   0 1032.58 41.5108   1
  -4  11   0 991.605 41.6710   1
  -7  11   0 1001.93 41.6991   3
  -4  11   0 953.287 40.6678   3
  -7  -4   0 1041.35 42.7748   1
  11  -4   0 986.625 40.0821   2
  -7  11   0 1012.16 42.4208   1
  -4  11   0 1012.46 41.1996   1
   1  10   0 2201.92 82.0310   1
 -11  10   0 2233.16 83.1640   3
  10   1   0 2138.62 81.4830   2
 -11   1   0 2058.42 81.1840   2
 -11   1   0 2098.54 84.8414   1
 -11  10   0 2216.10 84.7173   1
 -11  10   0 2257.42 80.7056   2
 -10  11   0 2214.53 84.2108   1
  -1 -10   0 2177.85 81.7993   1
  -1  11   0 2121.79 80.7804   3
 -10  11   0 2264.86 83.4163   3
  -1  11   0 2152.26 80.6188   3
 -10  11   0 2320.66 80.2385   2
  11  -1   0 2036.59 81.3585   2
  -1  11   0 2086.46 81.7554   1
 -10  -1   0 2088.24 83.6729   2
 -10  -1   0 2253.30 84.4453   1
 -12   6   0 1823.17 68.9873   3
 -12   6   0 1836.53 72.4114   1
 -12   6   0 1820.88 68.6015   2
 -12   6   0 1720.68 68.0456   3
   6   6   0 1810.51 67.7094   2
  -6  -6   0 1805.78 69.8818   1
  -6  12   0 1836.41 70.2128   1
  -6  12   0 1774.43 69.6301   1
  -6  12   0 1801.43 69.8028   3
 -12   9   0 902.219 37.0992   2
   3   9   0 826.115 35.2082   2
 -12   3   0 909.041 36.4595   3
 -12   3   0 912.652 42.1974   1
 -12   3   0 922.381 37.8698   2
 -12   9   0 932.659 41.8644   1
 -12   3   0 849.351 35.1464   3
   9   3   0 825.028 46.5908   2
   3   9   0 829.018 38.3275   1
   9   3   0 796.361 39.6097   1
 -12   9   0 917.461 39.1039   3
  -3  -9   0 878.393 38.1446   1
  -3  12   0 863.917 38.1471   1
  -9  12   0 966.874 35.4965   2
  -3  12   0 921.719 37.6054   3
  -9  12   0 899.655 40.7492   1
  -9  12   0 881.139 39.4540   3
  -3  12   0 937.727 38.2524   3
  12  -3   0 915.777 37.4725   2
  -9  -3   0 881.401 41.1283   1
 -12  12   0 228.828 23.3835   1
 -12   0   0 235.444 17.9451   2
 -12  12   0 226.624 16.7487   2
  12   0   0 247.375 18.1514   2
 -12  12   0 231.724 20.1217   3
   0  12   0 229.300 18.7017   1
 -12   0   0 209.446 22.9472   1
   8   5   0 178.470 16.4450   2
   5   8   0 217.035 19.7039   1
 -13   5   0 187.071 22.4614   1
 -13   5   0 202.639 17.3554   2
   5   8   0 199.190 18.8265   2
 -13   8   0 180.943 16.4452   2
 -13   5   0 178.011 13.7370   3
 -13   8   0 200.161 18.3653   3
 -13   8   0 187.058 22.5407   1
   8   5   0 194.967 19.2829   1
 -13   5   0 201.873 16.4391   3
  -5  -8   0 213.659 18.8554   1
  -5  13   0 216.433 19.6706   1
  -5  13   0 205.170 17.5511   1
  -8  13   0 184.676 19.2613   3
  -5  13   0 197.208 18.9524   3
  -8  13   0 199.310 20.0459   1
 -13  11   0 224.909 20.0080   3
 -13  11   0 224.250 17.2282   2
   2  11   0 223.112 19.3488   1
  11   2   0 188.955 18.0146   2
 -13  11   0 227.996 23.4788   1
 -13   2   0 213.754 23.9590   1
   2  11   0 195.297 14.6446   2
 -13   2   0 224.639 18.0721   2
 -11  13   0 244.837 15.3384   2
  13  -2   0 208.279 17.3757   2
 -11  13   0 253.338 22.7130   1
 -11  13   0 196.982 19.6331   3
 -11  -2   0 196.254 22.2176   1
  -2  13   0 230.630 18.4125   3
  -2  13   0 219.029 16.4461   3
  -2  13   0 252.135 18.8770   1
  -2 -11   0 200.599 19.6606   1
   7   7   0 30.4194 11.8325   1
   7   7   0 42.1545 9.83751   2
 -14   7   0 60.2060 11.5628   2
 -14   7   0 48.7248 14.3316   1
 -14   7   0 47.9977 11.2239   3
  -7  14   0 41.0902 12.8484   1
  -7  -7   0 37.1871 12.4183   1
  -7  14   0 30.8740 12.4336   3
   4  10   0 32.3655 11.1033   1
 -14   4   0 23.7858 9.27991   3
 -14   4   0 18.1247 6.72081   3
 -14   4   0 22.6802 10.1543   2
 -14  10   0 33.0656 10.0643   2
 -14   4   0 30.8018 14.5963   1
  10   4   0 24.0918 11.4930   2
 -14  10   0 19.3030 14.0831   1
 -14  10   0 16.5529 11.4093   3
   4  10   0 21.9031 8.91480   2
 -10  -4   0 12.4534 11.9467   1
  -4  14   0 36.2715 10.3433   1
 -10  14   0 27.4793 13.4676   1
  -4  14   0 18.9240 11.3054   3
  -4 -10   0 25.7959 10.1717   1
 -10  14   0 25.4758 12.0399   3
 -14   1   0 30.7301 14.3252   1
  13   1   0 28.0740 10.6086   2
 -14  13   0 41.3603 10.5861   2
 -14  13   0 20.5567 14.8344   1
   1  13   0 43.6434 10.9442   1
 -14  13   0 34.0356 12.9614   3
 -13  -1   0 -6.2026 13.0942   1
  -1  14   0 26.7778 8.77829   3
 -13  14   0 17.7091 12.5288   3
  -1  14   0 29.9936 11.9833   3
  14 -13   0 30.7271 7.57384   2
  14  -1   0 30.8787 10.5503   2
 -13  14   0 40.3147 15.2350   1
  -1  14   0 49.4977 10.6699   1
 -15   9   0 209.847 24.3398   1
   9   6   0 210.512 17.3272   2
 -15   9   0 189.075 17.5701   2
 -15   9   0 210.330 18.7024   3
 -15   6   0 210.864 18.5674   2
 -15   6   0 191.594 17.7178   3
   6   9   0 177.635 16.3766   2
 -15   6   0 183.278 23.9666   1
  -9  15   0 222.798 22.2158   1
  -6  -9   0 183.395 19.3543   1
  -6  15   0 180.855 20.5992   1
  -6  15   0 160.176 19.6808   3
  -9  -6   0 173.732 20.3674   1
  -9  15   0 192.856 20.2409   3
 -15   3   0 95.2373 13.6273   2
   3  12   0 104.778 13.4026   2
 -15   3   0 91.7008 17.6401   1
 -15  12   0 113.537 15.3635   2
  12   3   0 96.2682 13.9315   2
 -15  12   0 121.109 15.7576   3
 -15  12   0 134.997 19.6538   1
  -3 -12   0 116.040 15.4790   1
 -12  15   0 106.052 15.8750   3
 -12  15   0 122.104 17.6170   1
  -3  15   0 88.6451 14.1948   3
  -3  15   0 95.3582 15.7689   1
 -12  -3   0 115.953 17.3634   1
 -15  15   0 1194.67 52.6080   3
 -15   0   0 1133.97 54.0298   1
 -15  15   0 1183.33 55.0962   1
 -16   8   0 270.616 20.5285   3
   8   8   0 212.205 18.6910   2
 -16   8   0 262.404 26.1925   1
 -16   8   0 252.865 20.1824   2
  -8  16   0 265.566 22.7993   3
  -8  -8   0 251.534 22.5398   1
  -8  16   0 279.938 23.3210   1
  11   5   0 286.168 20.4356   2
 -16  11   0 250.037 27.0484   1
 -16   5   0 249.732 26.5075   1
   5  11   0 229.620 18.3577   2
 -16   5   0 233.750 19.5176   3
 -16   5   0 272.866 32.6932   2
 -16  11   0 243.673 19.9564   2
 -16  11   0 260.791 21.6312   3
 -11  16   0 270.944 23.2688   3
 -11  -5   0 225.003 23.1361   1
  -5  16   0 264.177 22.7019   3
  -5  16   0 252.545 23.0978   1
 -11  16   0 265.991 25.4174   1
  -5 -11   0 304.322 21.1867   1
 -16  14   0 51.2255 14.2879   3
 -16  14   0 50.4706 17.4991   1
 -16   2   0 49.2791 18.1162   1
  14   2   0 77.5932 23.3249   2
  -2  16   0 48.4747 14.2661   1
 -14  16   0 43.1890 16.3067   1
  16 -14   0 59.3837 9.72827   2
 -14  16   0 32.1011 14.0824   3
 -14  -2   0 51.9785 15.8484   1
  -2  16   0 48.8624 13.1469   3
 -17   7   0 97.5349 14.5815   2
 -17  10   0 73.1249 13.7477   3
  10   7   0 68.1545 12.8975   2
 -17  10   0 65.2523 13.0170   2
 -17   7   0 62.1759 18.4089   1
   7  10   0 67.0901 12.2801   2
 -17  10   0 78.2922 17.6944   1
 -10  17   0 52.9522 15.9175   1
 -10  -7   0 78.7470 14.7311   1
  -7  17   0 69.2091 15.4892   1
  -7 -10   0 66.0991 13.4398   1
 -10  17   0 60.9511 15.2285   3
  -7  17   0 61.7396 15.3699   3
  13   4   0 104.414 14.8460   2
 -17  13   0 99.2990 19.7520   1
 -17   4   0 73.7510 18.0654   1
   4  13   0 89.8492 12.0729   2
 -17  13   0 94.4979 16.0608   3
  17 -13   0 93.4410 11.9965   2
  -4 -13   0 125.262 16.4864   1
  -4  17   0 106.868 16.7332   1
 -13  17   0 94.0914 18.6335   1
 -13  -4   0 101.228 16.9369   1
  -4  17   0 86.3031 14.9032   3
 -13  17   0 111.663 17.7219   3
 -17   1   0 520.958 35.0777   1
 -17  16   0 492.177 31.2786   3
 -17  16   0 482.856 35.4823   1
 -16  -1   0 529.595 34.7581   1
 -16  17   0 494.677 35.2561   1
 -16  17   0 477.148 31.2514   3
   9   9   0 71.6074 13.0559   2
 -18   9   0 39.5687 12.9530   3
 -18   9   0 58.0567 17.8847   1
  -9  18   0 40.0881 15.7076   1
 -18  12   0 21.9989 15.8188   1
 -18  12   0 22.4316 12.9473   3
 -18   6   0 22.5840 12.0001   3
   6  12   0 18.1171 10.1332   2
 -18   6   0 27.5468 16.7200   1
  12   6   0 26.1970 12.1587   2
 -12  18   0 26.9221 16.0739   1
  -6 -12   0 37.1724 12.1808   1
 -12  18   0 23.4877 14.6863   3
 -12  -6   0 46.6482 13.7516   1
  -6  18   0 24.7913 13.9540   3
  -6  18   0 18.8893 13.6342   1
 -18  15   0 201.664 28.2884   1
 -18  15   0 207.415 23.2875   3
 -18   3   0 217.119 27.0703   1
  -3  18   0 199.521 22.1130   3
 -15  -3   0 244.363 26.1263   1
 -15  18   0 193.186 23.3282   3
  -3  18   0 236.483 24.0225   1
 -15  18   0 207.773 27.6046   1
 -18   0   0 30.4425 17.1485   1
 -18  18   0 22.4511 16.0345   3
 -18  18   0 3.81757 18.3686   1
   0  18   0 49.7245 15.5407   1
 -19   8   0 161.302 17.7563   3
  11   8   0 150.986 19.4510   2
 -19  11   0 170.619 21.4725   3
 -19   8   0 141.535 22.0936   1
 -19  11   0 165.700 26.9944   1
   8  11   0 182.761 28.5868   2
  -8 -11   0 191.078 20.2226   1
 -11  19   0 165.140 23.0021   3
  -8  19   0 161.868 22.7974   3
 -11  19   0 168.810 25.4914   1
 -11  -8   0 206.103 23.5217   1
  -8  19   0 147.405 20.3336   1
   5  14   0 50.0479 12.3072   2
 -19  14   0 48.1507 15.5362   3
 -19   5   0 46.0103 18.1989   1
 -19  14   0 64.3478 19.1161   1
 -14  -5   0 77.3939 17.2459   1
  -5 -14   0 63.8966 14.1895   1
  -5  19   0 51.4683 16.4713   1
  -5  19   0 40.4706 15.6017   3
 -14  19   0 70.5666 17.3396   3
 -14  19   0 51.1350 18.8324   1
 -19  17   0 13.2919 15.5754   3
 -19  17   0 5.16615 18.7116   1
 -19   2   0 17.1915 16.8536   1
 -17  19   0 13.0994 17.9319   1
 -17  -2   0 29.4838 16.2750   1
 -17  19   0 5.76777 15.1384   3
 -20  10   0 510.935 30.7521   3
 -20  10   0 514.215 37.7892   1
 -10  20   0 487.021 33.1002   3
 -10  20   0 514.040 34.7969   1
 -10 -10   0 496.001 31.0148   1
 -20  13   0 157.805 20.4011   3
 -20   7   0 143.516 21.4786   3
 -20  13   0 147.342 24.0528   1
   7  13   0 191.987 19.6255   2
 -20   7   0 152.520 23.9077   1
  -7 -13   0 226.271 21.5084   1
 -13  20   0 168.497 23.7347   1
  -7  20   0 155.124 20.8134   3
 -13  -7   0 199.903 23.9239   1
  -7  20   0 156.015 21.2985   1
 -13  20   0 147.484 21.1195   3
 -20  16   0 112.370 19.3957   3
 -20   4   0 141.196 22.9319   1
 -20  16   0 134.181 23.4409   1
  -4  20   0 80.1386 21.2360   3
  -4  20   0 127.900 19.9797   1
 -16  -4   0 164.974 24.5954   1
 -16  20   0 103.793 22.3102   1
 -16  20   0 88.5070 19.6013   3
 -21  12   0 608.880 42.3502   1
 -21   9   0 621.901 42.2110   1
 -21   9   0 590.174 34.6464   3
 -21  12   0 579.549 35.2495   3
 -12  21   0 573.294 37.5885   3
  -9 -12   0 622.827 33.9172   1
  -9  21   0 623.035 54.6195   1
 -12  -9   0 676.019 36.3013   1
 -12  21   0 586.994 38.9951   1
  -9  21   0 602.040 37.8948   3
 -21  15   0 150.084 21.1894   3
 -21   6   0 139.789 31.0894   1
 -15  21   0 130.324 23.5205   1
  -6  21   0 120.750 20.5742   1
 -15  -6   0 186.792 23.5227   1
  -6  21   0 110.943 20.8551   3
  -6 -15   0 183.555 19.2359   1
 -22  11   0 505.239 40.1117   1
 -22  11   0 505.111 33.8271   3
 -11  22   0 487.428 37.0635   1
 -11 -11   0 606.839 33.0546   1
 -11  22   0 519.228 36.4738   3
 -22  14   0 59.5846 17.0204   3
 -22  14   0 45.3437 21.6118   1
 -22   8   0 75.6957 21.3361   1
 -22   8   0 34.7514 15.3602   3
  -8  22   0 30.4355 18.4454   3
 -14  -8   0 85.7434 17.0235   1
 -14  22   0 33.5221 20.7782   1
  -8  22   0 43.5023 19.8515   1
 -14  22   0 40.0645 18.5132   3
   0   1  -1 656.379 24.5700   3
   1  -1  -1 661.706 24.4706   1
   0  -1   1 627.133 23.8807   2
   1  -1  -1 666.158 24.6886   3
   0   1  -1 658.529 24.8943   1
  -1   0  -1 680.182 24.4388   3
  -2   2  -1 409.085 16.7873   3
   2   0  -1 438.428 17.9135   1
   2   0  -1 406.476 16.9010   3
   2  -2   1 438.896 16.1148   2
   0   2   1 423.644 16.1984   2
   0  -2  -1 436.502 16.5479   3
  -2   0   1 384.831 16.6181   3
   2   1   1 864.589 33.5658   2
  -3   2   1 905.122 34.5511   1
   1  -3   1 936.494 33.9700   3
  -3   1  -1 931.969 34.4066   1
  -3   1  -1 922.775 33.6234   3
  -3   2   1 930.683 34.1761   3
  -3   1  -1 918.438 33.7608   2
   1   2  -1 929.672 35.7293   1
   1  -3   1 916.385 34.4917   1
   2  -3  -1 906.733 34.8237   3
   1   2  -1 877.336 33.6400   3
   2  -3  -1 914.943 33.5472   1
   3  -2  -1 915.301 34.9113   3
   3  -1   1 908.301 33.6429   2
  -1  -2   1 923.626 33.6594   3
   3  -2  -1 904.733 34.4939   1
  -2   3   1 904.101 33.3040   2
  -1   3  -1 893.924 33.9239   3
  -2  -1  -1 855.700 33.4810   2
  -1   3  -1 886.843 35.5847   1
  -2   3   1 922.039 34.1429   3
  -1  -2   1 921.466 34.6894   1
   3  -2  -1 869.967 33.5171   2
  -2   3   1 814.261 34.5537   1
   3  -1   1 1023.91 34.5818   1
   3  -1   1 952.717 33.6880   3
   0   4  -1 65.1592 10.3021   1
   0  -4   1 91.8334 8.14403   3
  -4   0  -1 79.2587 8.83069   2
   4  -4  -1 58.8893 9.07068   3
   4  -4  -1 53.3651 7.33238   2
   4  -4  -1 65.6449 9.50922   1
  -4   4   1 93.8755 9.71276   3
  -4   0  -1 86.5933 10.1862   1
   4   0   1 73.1974 8.59154   2
   0  -4   1 89.4630 9.76507   1
  -4   4   1 99.9815 10.7917   1
   4   0   1 94.0964 10.7185   1
  -4   1   1 157.122 9.96212   3
   3   1  -1 134.494 12.3661   1
   3   1  -1 161.472 9.97066   3
   3  -4   1 153.507 9.73662   3
   1  -4  -1 140.831 7.88124   2
  -4   3  -1 141.630 9.05731   2
   1  -4  -1 138.716 10.6654   3
  -4   3  -1 157.104 11.9235   1
   1   3   1 139.866 8.62394   2
  -4   1   1 134.141 12.7115   1
  -4   3  -1 145.145 9.60333   3
  -3  -1   1 135.965 12.5947   1
  -3   4  -1 146.680 7.98878   2
  -1   4   1 151.233 9.67165   3
   4  -3   1 142.902 8.87313   2
   4  -1  -1 148.061 10.6722   3
   4  -3   1 136.636 11.4956   1
  -3  -1   1 132.797 9.61402   3
  -3   4  -1 125.913 12.2279   1
   4  -1  -1 148.608 12.5025   1
   4  -3   1 152.442 9.65185   3
  -3   4  -1 138.440 9.79594   3
  -1  -3  -1 139.572 8.31603   2
  -1   4   1 146.138 8.37122   2
   2   3  -1 316.958 15.5831   3
   2  -5   1 362.732 16.2687   3
  -5   2  -1 349.200 17.8779   1
   3  -5  -1 350.766 14.5236   2
   3   2   1 362.257 15.8149   2
  -5   3   1 357.890 18.6810   1
   3  -5  -1 337.569 16.0651   1
   3  -5  -1 330.389 16.3457   3
   3   2   1 405.036 15.9093   1
  -5   3   1 355.946 16.8120   3
  -5   2  -1 343.301 15.5428   3
  -5   2  -1 350.941 16.2410   2
   2   3  -1 328.858 18.2575   1
   5  -3  -1 340.022 18.1275   1
   5  -3  -1 332.497 15.8199   2
   5  -3  -1 344.207 16.6057   3
  -3   5   1 350.586 14.7693   2
   5  -2   1 362.628 15.9772   2
   5  -2   1 352.516 17.5495   1
  -2   5  -1 357.219 17.5687   1
  -3   5   1 362.546 16.2056   1
  -2  -3   1 352.016 18.3529   1
   5  -2   1 375.848 15.7884   3
  -3   5   1 341.517 16.7032   3
  -2   5  -1 343.119 16.3396   3
  -5   0   1 9843.21 346.809   3
   5  -5   1 9897.47 348.611   1
  -5   5  -1 9669.17 348.530   1
   5   0  -1 9910.20 348.591   1
   0   5   1 9618.62 346.550   3
  -5   5  -1 9976.12 347.786   3
   5   0  -1 9837.83 347.031   2
   5  -5   1 9627.26 346.138   2
  -5   0   1 9609.99 348.550   1
   5  -5   1 9999.99 347.810   3
   0   5   1 9958.86 346.230   2
  -5   5  -1 9880.35 346.479   2
   5  -6  -1 900.446 32.2937   1
   1   5  -1 810.768 30.6632   3
   5  -6  -1 875.306 30.0271   2
   1   5  -1 798.201 32.7242   1
  -6   1  -1 795.690 32.9025   1
  -6   5   1 806.122 33.0445   1
   5  -6  -1 906.767 32.2548   3
   1  -6   1 697.128 32.1824   1
   1  -6   1 670.879 30.8197   3
   5  -6  -1 895.715 30.2330   2
  -6   5   1 817.469 32.1821   3
   5   1   1 684.282 31.3882   1
   5   1   1 762.953 31.1835   2
  -6   1  -1 771.606 31.3057   2
   6  -5  -1 870.435 31.8902   3
   6  -1   1 682.349 32.1025   1
   6  -5  -1 907.183 33.0301   1
   6  -5  -1 890.737 30.7301   2
  -5  -1  -1 825.800 31.2021   2
  -5   6   1 799.226 32.1664   3
  -5  -1  -1 814.639 32.2437   1
  -1   6  -1 763.153 32.5015   1
  -1  -5   1 742.985 32.3756   1
   6  -1   1 711.531 31.1388   2
  -5   6   1 815.065 32.3583   1
  -1   6  -1 791.392 31.3731   3
  -6   4  -1 225.078 12.2577   2
   2  -6  -1 189.140 11.7956   3
  -6   2   1 196.043 15.5085   1
   4   2  -1 219.452 11.8976   2
   2   4   1 230.329 11.3342   2
   4   2  -1 221.505 15.2787   1
  -6   4  -1 217.582 12.2622   3
   4  -6   1 225.990 12.8971   3
  -6   4  -1 232.052 15.0372   1
  -6   2   1 214.951 12.6859   3
   6  -4   1 222.486 14.2120   1
  -4   6  -1 207.795 12.6913   3
  -2   6   1 210.433 12.5784   3
  -2  -4  -1 207.201 10.5444   2
   6  -2  -1 189.703 12.1929   2
  -4   6  -1 206.729 14.9868   1
   6  -4   1 214.205 11.2933   2
   6  -2  -1 197.272 12.0593   3
  -4  -2   1 217.610 15.2662   1
   6  -2  -1 207.355 15.1001   1
  -7   7   1 65.4836 10.0512   1
   7  -7  -1 67.6423 6.97095   2
  -7   0  -1 84.8235 12.5468   1
   0   7  -1 88.4926 11.7451   1
   7  -7  -1 59.5012 6.32011   2
   7  -7  -1 49.3695 8.69674   1
  -7   7   1 71.6302 9.04225   3
   7   0   1 104.938 10.3340   2
   0   7  -1 77.4767 8.74669   3
  -7   3  -1 885.364 34.5105   3
   3   4  -1 924.596 37.0179   1
  -7   3  -1 890.690 36.8034   1
  -7   4   1 894.349 37.1558   1
  -7   3  -1 887.860 34.8710   2
   4   3   1 826.886 34.6012   1
   3   4  -1 927.777 33.9958   2
  -7   4   1 877.976 35.3741   3
   4  -7  -1 951.331 35.1879   1
   3  -7   1 890.494 35.3004   3
   4   3   1 857.951 34.4218   2
  -3   7  -1 906.998 35.3403   3
  -4   7   1 913.601 35.1551   1
   7  -3   1 840.010 34.4846   2
  -4   7   1 903.572 35.4512   3
   7  -3   1 841.305 36.2630   1
  -3  -4   1 876.789 36.6959   1
  -4   7   1 928.855 34.4833   2
   7  -4  -1 942.691 36.8948   1
   7  -4  -1 926.796 34.5577   2
   7  -4  -1 881.268 34.9662   3
  -3   7  -1 918.825 36.4999   1
  -4  -3  -1 893.651 35.0863   1
   6   1  -1 699.273 32.5102   1
   1   6   1 759.673 28.9186   2
   6   1  -1 736.185 30.2045   2
  -7   1   1 808.087 33.5750   1
  -7   6  -1 738.527 32.6438   1
  -7   6  -1 748.227 30.6867   3
  -7   6  -1 753.062 29.6706   2
  -7   1   1 772.731 29.8048   3
   7  -6   1 749.331 32.3467   1
  -6   7  -1 736.744 32.6533   1
   7  -6   1 735.117 28.8535   2
   7  -1  -1 764.744 32.5527   1
  -6  -1   1 745.766 33.1312   1
  -6   7  -1 758.040 28.9269   2
   7  -1  -1 773.561 29.6036   3
  -6   7  -1 729.655 30.9041   3
  -1   7   1 784.976 29.9191   3
   7  -1  -1 752.695 30.2389   2
  -8   2  -1 850.877 34.2416   1
   6   2   1 732.329 31.9939   1
  -8   6   1 790.296 34.5187   1
   6  -8  -1 757.810 32.4574   1
  -8   6   1 755.624 32.4494   3
  -8   2  -1 852.443 30.6791   3
  -8   2  -1 845.988 31.7345   2
   6   2   1 794.917 31.5707   2
   2   6  -1 736.937 33.2116   1
  -6  -2  -1 694.791 30.8892   2
   8  -6  -1 753.193 33.5458   1
  -6   8   1 758.676 32.7709   1
   8  -2   1 832.903 33.5519   1
  -2  -6   1 781.503 33.2111   1
  -2   8  -1 862.334 32.0404   3
   8  -6  -1 748.591 30.7680   2
  -2   8  -1 870.246 33.5649   1
   8  -2   1 866.111 31.8583   2
   8  -6  -1 715.757 31.9485   3
  -6  -2  -1 749.788 32.7604   1
  -6   8   1 742.287 32.4377   3
   5   3  -1 182.863 15.9793   1
  -8   3   1 216.678 13.4360   3
  -8   5  -1 183.522 12.4262   2
  -8   3   1 222.303 17.2304   1
   3   5   1 192.236 11.6125   2
  -8   5  -1 186.659 15.7045   1
  -8   5  -1 183.817 12.2218   3
   5   3  -1 207.156 12.5650   2
  -3   8   1 218.382 13.3732   3
   8  -3  -1 206.026 12.6004   2
   8  -5   1 175.276 14.9162   1
  -5  -3   1 192.352 15.9528   1
   8  -3  -1 210.013 12.2585   3
  -5   8  -1 172.695 13.0753   3
   8  -5   1 179.278 11.6828   2
  -3   8   1 212.705 10.2628   2
   8  -3  -1 205.225 15.5737   1
  -3  -5  -1 200.894 10.7726   2
  -3   8   1 219.727 12.2739   1
  -5   8  -1 170.289 14.3427   1
  -5   8  -1 180.831 15.6539   1
  -3   8   1 214.525 12.6128   1
  -8   8  -1 5.98038 6.03519   2
   8  -8   1 6.81582 8.38585   1
   0   8   1 6.54927 5.09462   2
  -8   8  -1 13.5786 6.84057   3
  -8   8  -1 6.20700 9.32638   1
   8   0  -1 11.3666 9.17358   1
   8  -8   1 3.27544 4.77767   2
   8   0  -1 14.2296 7.10904   2
   0   8   1 14.2370 6.33482   3
  -8   0   1 1.28170 9.54408   1
  -9   8   1 306.312 18.1246   3
  -9   1  -1 250.778 19.6285   1
   8  -9  -1 278.180 18.2180   1
   8  -9  -1 267.336 13.7821   2
  -9   8   1 308.010 20.7264   1
   1   8  -1 266.428 18.4576   1
   1  -9   1 286.333 17.8969   1
  -9   1  -1 271.638 16.3987   2
   8   1   1 304.590 17.9799   1
   8   1   1 283.521 16.6312   2
   8  -9  -1 285.901 13.6092   2
  -1  -8   1 279.240 18.1344   1
  -1   9  -1 264.737 18.2055   1
   9  -1   1 280.324 16.5889   2
  -8  -1  -1 261.624 16.2567   2
   9  -8  -1 285.693 18.6323   1
  -8   9   1 323.822 19.6385   1
   9  -8  -1 263.163 14.4486   2
   9  -8  -1 263.031 14.7635   2
  -1   9  -1 265.711 15.9695   3
  -8  -1  -1 251.984 19.5785   1
  -8   9   1 300.162 17.9390   3
   5   4   1 90.1552 8.96964   2
  -9   4  -1 102.482 14.9593   1
  -9   5   1 90.6068 12.2841   1
   4   5  -1 109.981 10.1668   2
  -9   5   1 84.3720 11.7224   3
  -9   4  -1 110.307 9.84177   3
  -9   4  -1 91.6887 10.6011   2
   5   4   1 98.3524 11.5862   1
   4   5  -1 94.1199 14.3003   1
  -4  -5   1 94.4924 13.9914   1
  -5  -4  -1 82.9362 12.0632   1
  -5  -4  -1 93.5448 9.42578   2
   9  -4   1 93.0024 10.2992   2
  -5   9   1 84.8857 11.7880   3
   9  -5  -1 99.6654 13.9385   1
  -5   9   1 83.4824 8.27313   2
  -4   9  -1 98.5216 10.9866   3
  -4   9  -1 111.414 12.7954   1
  -5   9   1 99.1906 12.1698   1
   9  -5  -1 95.6093 10.4133   2
   9  -5  -1 77.3161 10.6614   3
  -9   2   1 1711.18 65.6969   3
   7   2  -1 1734.16 65.9305   2
  -9   2   1 1794.88 69.5491   1
  -9   7  -1 1816.71 65.7162   2
  -9   7  -1 1840.82 69.0795   1
  -9   7  -1 1797.40 66.8681   3
   9  -2  -1 1670.71 68.4606   1
  -2   9   1 1710.25 66.0134   3
   9  -2  -1 1654.06 65.3150   3
  -7   9  -1 1768.79 67.1976   3
  -7   9  -1 1889.57 64.6160   2
   9  -7   1 1786.85 68.6471   1
  -7   9  -1 1810.63 68.6566   1
   9  -2  -1 1739.51 66.2215   2
   9  -7   1 1767.73 65.0835   2
  -7  -2   1 1827.15 69.2852   1
   0  10  -1 4167.21 156.112   1
  10 -10  -1 4480.76 153.087   2
 -10   0  -1 4151.18 156.638   1
   0 -10   1 4344.35 156.216   1
 -10  10   1 4388.62 156.218   3
  10 -10  -1 4392.82 157.095   1
 -10   0  -1 4117.32 154.311   2
  10   0   1 4314.33 154.844   2
 -10  10   1 4544.55 157.799   1
   0  10  -1 4242.38 153.982   3
  10   0   1 3872.77 155.541   1
   7 -10  -1 294.447 17.9329   1
   3   7  -1 286.962 15.0685   2
 -10   3  -1 256.345 16.7221   2
   7   3   1 314.944 17.0618   2
   3   7  -1 280.655 20.0309   1
   7   3   1 301.952 17.8727   1
 -10   7   1 292.654 18.0749   3
 -10   7   1 290.919 21.6213   1
 -10   3  -1 263.905 21.3723   1
 -10   3  -1 260.127 14.6521   3
 -10   3  -1 243.703 15.3857   3
  10  -3   1 258.633 18.9387   1
  -3  -7   1 305.630 19.5151   1
  10  -7  -1 272.699 19.4845   1
  -3  10  -1 271.916 16.7413   3
  10  -7  -1 262.889 15.3610   2
  -7  10   1 307.239 19.1053   1
  -7  -3  -1 286.200 19.1168   1
  10  -3   1 260.120 16.4308   2
  -7  10   1 289.650 19.5112   3
  -3  10  -1 248.647 20.3395   1
   4   6   1 601.277 25.4852   2
   6   4  -1 544.157 25.6516   2
 -10   4   1 638.729 27.1023   3
 -10   6  -1 609.588 31.6799   1
 -10   6  -1 599.030 26.3307   2
   4   6   1 571.840 26.2071   1
 -10   4   1 623.030 34.6227   1
   6   4  -1 525.667 31.1319   1
  10  -4  -1 585.751 26.2903   2
  -6  -4   1 610.128 30.1456   1
  -4  10   1 643.499 26.6830   1
  -4  10   1 616.628 26.2906   1
  -6  10  -1 606.337 29.7048   1
  -4  10   1 648.995 27.3823   3
  10  -6   1 618.597 25.7256   2
  -4  -6  -1 560.615 24.7329   2
  10  -6   1 634.376 29.4403   1
  -6  10  -1 602.000 27.4447   3
  10  -4  -1 583.769 29.4124   1
  -6  10  -1 590.866 28.4447   1
 -10   9  -1 242.630 21.2122   1
   9   1  -1 251.813 16.8959   2
 -10   1   1 202.073 21.2538   1
   9   1  -1 238.991 21.5998   1
   1   9   1 212.139 13.6994   2
 -10   9  -1 234.826 14.9171   2
  -9  -1   1 226.539 21.2483   1
  -9  10  -1 246.977 20.8618   1
  -9  10  -1 236.608 14.1357   2
  -1  10   1 228.243 14.8128   3
  -1  10   1 230.012 15.7301   3
  10  -1  -1 252.628 16.8580   2
 -11   2  -1 143.554 19.4739   1
 -11   9   1 149.685 19.7632   1
   9   2   1 132.922 15.9686   1
 -11   2  -1 112.752 14.3700   2
 -11   9   1 124.974 16.0372   3
   9 -11  -1 147.594 15.6313   1
   9   2   1 143.176 14.8035   2
   2   9  -1 154.973 17.5517   1
  -9  11   1 149.621 18.3613   1
  -2  11  -1 131.600 14.5848   3
  11  -9  -1 139.989 12.6281   2
  -9  11   1 150.080 16.1275   3
  -9  -2  -1 161.223 14.1695   2
  11  -2   1 115.495 13.7058   2
  -2  11  -1 151.471 16.6060   1
  -2  -9   1 150.502 16.6434   1
  -9  -2  -1 167.037 18.4069   1
 -11   5  -1 1341.83 55.8066   1
 -11   5  -1 1315.24 52.1422   2
 -11   5  -1 1322.60 51.7124   3
   5   6  -1 1340.51 51.0291   2
 -11   6   1 1396.16 53.2087   3
   6   5   1 1302.81 52.3544   1
 -11   5  -1 1314.52 52.0989   3
 -11   6   1 1344.61 55.9409   1
   6   5   1 1373.98 51.7542   2
   5   6  -1 1288.17 54.2904   1
  -6  -5  -1 1349.73 52.7533   1
  -6  11   1 1355.62 49.7612   2
  -5  11  -1 1329.93 53.0323   3
  -5  -6   1 1466.95 55.1524   1
  11  -5   1 1326.70 51.6580   2
  -6  11   1 1321.01 61.2262   3
  -5  11  -1 1312.21 53.9606   1
  -6  -5  -1 1346.33 50.7928   2
  11  -6  -1 1267.41 51.5098   2
  -6  11   1 1374.69 53.0656   1
  -5  11  -1 1381.55 55.1520   1
   8   3  -1 253.054 21.5682   1
 -11   3   1 286.951 17.8060   3
 -11   8  -1 286.979 19.1112   3
 -11   3   1 292.707 24.2415   1
 -11   8  -1 316.574 23.1470   1
   8   3  -1 250.282 17.7875   2
   3   8   1 245.214 16.1676   2
  -3  11   1 289.213 18.5416   3
  -3  11   1 293.307 16.7712   1
  11  -3  -1 292.032 17.8020   2
  -8  11  -1 303.005 21.9902   1
  -3  11   1 294.727 18.4743   3
  -3  11   1 291.693 17.6986   1
  -8  -3   1 237.767 23.7775   1
  -8  11  -1 303.343 14.8653   2
  11   0  -1 2065.43 74.8368   2
   0  11   1 1999.46 71.8652   2
 -11  11  -1 1863.26 75.8275   3
 -11  11  -1 1935.83 78.0432   1
 -11   0   1 1919.78 78.1881   1
 -11  11  -1 1968.17 73.1206   2
  11   1   1 1001.19 42.2810   2
 -12  11   1 1053.06 44.4004   3
 -12   1  -1 1002.82 45.9769   1
 -12   1  -1 973.606 42.0288   2
 -12  11   1 1036.01 46.4152   1
   1  11  -1 950.132 46.2625   1
 -11  12   1 1049.39 45.9431   1
  12  -1   1 1039.39 51.8947   2
 -11  -1  -1 964.108 41.9070   2
  -1 -11   1 1047.95 44.8201   1
 -11  -1  -1 1014.83 45.4704   1
 -11  12   1 996.219 44.0047   3
  12 -11  -1 1034.80 39.8364   2
  -1  12  -1 997.496 41.2355   3
 -12   4  -1 388.662 25.9277   1
 -12   4  -1 375.730 18.4697   3
   4   8  -1 352.725 18.7814   2
 -12   8   1 382.203 26.1247   1
   4   8  -1 356.076 24.0172   1
 -12   4  -1 384.869 19.8731   3
 -12   4  -1 368.785 20.7690   2
   8   4   1 289.193 20.0103   2
 -12   8   1 356.380 22.0697   3
  -8  -4  -1 345.906 22.6477   1
  -4  -8   1 333.368 22.8299   1
  -8  -4  -1 348.073 18.4343   2
  -8  12   1 349.617 22.4224   3
  12  -4   1 367.070 20.1734   2
  -8  12   1 374.762 23.1694   1
  -4  12  -1 365.040 22.7607   3
  -4  12  -1 404.473 23.1419   1
   5   7   1 321.348 18.4250   2
 -12   7  -1 324.250 20.3089   3
 -12   7  -1 350.062 25.2136   1
 -12   5   1 323.237 25.3326   1
 -12   7  -1 330.894 19.7317   3
   7   5  -1 348.851 19.5465   2
 -12   5   1 344.756 20.5353   3
 -12   7  -1 358.851 19.6828   2
   7   5  -1 325.549 32.4476   1
  -5  12   1 323.840 19.4009   1
  -7  -5   1 309.818 23.2173   1
  12  -5  -1 340.142 19.1883   2
  -5  12   1 328.429 20.8255   3
  -5  12   1 363.329 20.5208   1
  -5  -7  -1 322.674 16.3694   2
  -7  12  -1 346.476 24.1414   1
  -5  -7  -1 324.789 19.7998   1
   2  10   1 351.739 18.7057   2
 -12  10  -1 349.805 22.3477   3
 -12  10  -1 380.168 19.9294   2
 -12  10  -1 392.827 26.4984   1
 -12   2   1 342.337 26.7315   1
  10   2  -1 355.215 21.1942   2
 -10  -2   1 333.807 26.0910   1
 -10  12  -1 381.751 18.6817   2
  -2  12   1 345.855 20.8810   3
 -10  12  -1 375.824 25.5398   1
 -10  12  -1 357.868 23.0913   3
  -2  12   1 342.079 19.4811   3
  12  -2  -1 302.796 22.2009   2
 -13  13   1 132.984 18.3689   3
 -13   0  -1 133.417 16.5064   2
   0  13  -1 140.542 15.6745   3
   0  13  -1 165.069 14.9008   3
   0 -13   1 167.528 18.3664   1
 -13   0  -1 147.238 21.2844   1
 -13  13   1 150.448 18.9512   1
  13   0   1 128.574 16.2480   2
 -13  10   1 428.907 25.2421   3
  10   3   1 451.850 23.9165   2
 -13   3  -1 379.407 23.6253   2
 -13  10   1 462.742 29.7454   1
 -13   3  -1 390.485 28.6302   1
   3  10  -1 442.313 20.9346   2
 -10  -3  -1 444.544 26.6320   1
  -3 -10   1 477.524 26.0915   1
  13 -10  -1 408.881 21.5333   2
 -10  13   1 432.993 27.3833   1
 -10  13   1 452.006 25.9313   3
 -13   6  -1 114.093 12.3532   2
 -13   7   1 115.606 16.0262   3
   6   7  -1 106.899 13.8927   2
 -13   6  -1 119.886 16.7184   1
 -13   6  -1 105.384 12.1969   3
 -13   7   1 104.442 16.8065   1
   7   6   1 103.255 13.2022   1
   7   6   1 104.048 14.1137   2
 -13   6  -1 125.517 15.7377   3
  -7  13   1 91.7435 13.4758   3
  -7  13   1 105.249 17.3190   1
  -7  -6  -1 102.033 15.4862   1
  -6  -7   1 116.435 18.7636   1
  -6  13  -1 111.882 16.3032   1
  -7  13   1 77.4363 11.3412   1
 -13   4   1 166.826 16.6875   3
 -13   9  -1 185.522 22.0853   1
 -13   4   1 166.457 23.4293   1
   9   4  -1 174.879 16.5024   2
 -13   9  -1 177.862 15.5535   2
 -13   9  -1 187.128 17.2855   3
   4   9   1 176.642 14.5777   2
  -9  13  -1 164.541 20.5723   1
  -4  13   1 157.134 16.2727   1
  -9  -4   1 177.147 20.8365   1
  13  -4  -1 162.677 21.8109   2
  -4  13   1 166.607 15.1281   1
  -4  13   1 158.544 17.5708   3
  -9  13  -1 152.226 18.6184   3
  12   1  -1 6.53908 10.0364   2
 -13  12  -1 7.13123 13.8703   1
 -13  12  -1 12.6244 8.61479   2
 -13  12  -1 13.1924 10.7770   3
 -13   1   1 -16.170 12.6044   1
  13  -1  -1 4.06361 11.1006   2
 -12  13  -1 10.1387 11.0607   3
 -12  13  -1 6.23626 8.00604   2
 -12  13  -1 19.3697 13.7041   1
  -1  13   1 2.73212 7.59479   3
 -12  -1   1 3.85332 13.5322   1
  -1  13   1 -2.5180 9.70053   3
 -14   2  -1 352.381 27.4212   1
  12   2   1 365.921 22.4737   2
 -14   2  -1 333.009 22.3939   2
 -14  12   1 340.244 23.9067   3
 -14  12   1 356.531 28.0637   1
 -12  14   1 347.703 24.6194   3
  -2 -12   1 380.903 26.0480   1
  -2  14  -1 351.465 22.5539   3
 -12  14   1 382.802 26.9836   1
  14 -12  -1 352.579 19.1723   2
 -12  -2  -1 339.297 25.5717   1
 -14   9   1 262.295 21.1362   3
 -14   9   1 275.507 25.5120   1
 -14   5  -1 328.612 21.5055   3
   5   9  -1 279.902 17.9016   2
 -14   5  -1 282.184 25.1395   1
   9   5   1 249.853 20.2884   1
 -14   5  -1 284.538 20.1449   2
 -14   5  -1 285.722 16.9128   3
   9   5   1 296.693 19.6161   2
  -5  14  -1 298.421 21.5530   3
  -9  14   1 308.390 22.6298   1
  -9  -5  -1 269.900 17.6522   2
  -5  14  -1 320.431 24.2131   1
  -9  14   1 314.066 22.2508   3
  -5  -9   1 305.690 22.7381   1
 -14   8  -1 43.8400 15.0835   1
 -14   8  -1 48.8293 11.4267   3
 -14   6   1 59.7356 12.1855   3
 -14   8  -1 41.4570 10.3838   2
   8   6  -1 56.7928 10.6269   2
 -14   6   1 53.4728 15.0293   1
   6   8   1 65.3823 10.4135   2
  -6  14   1 59.2371 12.8124   3
  -8  14  -1 32.9047 12.4502   3
  -8  14  -1 50.9357 14.5138   1
  -8  -6   1 63.9647 14.0358   1
  -6  14   1 61.2443 12.3376   1
  -6  14   1 70.0359 10.9311   1
  11   3  -1 204.793 19.3188   2
 -14  11  -1 267.598 17.8687   2
   3  11   1 241.736 16.9730   2
 -14   3   1 261.469 18.6757   3
 -14  11  -1 221.522 20.0253   3
 -14  11  -1 279.377 24.9935   1
 -14   3   1 276.668 25.8121   1
  -3  14   1 273.024 20.2349   3
 -11  14  -1 281.255 24.5422   1
 -11  -3   1 204.401 23.1075   1
 -11  14  -1 268.830 15.9139   2
 -11  14  -1 244.567 21.1336   3
  14   0  -1 331.041 22.9957   2
 -14  14  -1 382.982 20.9190   2
 -14  14  -1 369.903 29.0855   1
 -14   0   1 285.792 27.9960   1
 -14  14  -1 373.751 25.0787   3
 -15   1  -1 114.928 18.5872   1
  14   1   1 138.907 17.2977   2
 -15  14   1 112.688 18.6100   1
 -15   1  -1 125.859 14.7040   2
  -1 -14   1 125.656 18.5780   1
 -14  -1  -1 114.479 14.1125   2
 -14  15   1 101.632 25.7354   3
 -14  15   1 101.755 18.6038   1
  -1  15  -1 112.271 14.8387   3
 -14  -1  -1 120.145 17.8045   1
 -15   4  -1 415.406 30.5911   1
 -15  11   1 444.749 30.3240   1
 -15  11   1 454.297 26.9620   3
 -15   4  -1 416.320 20.7424   3
   4  11  -1 442.309 22.3027   2
 -15   4  -1 447.191 25.3716   2
  11   4   1 368.019 24.2698   2
 -11  15   1 456.323 28.6521   1
 -11  -4  -1 397.684 26.5439   1
  -4 -11   1 395.235 26.4740   1
  -4  15  -1 480.197 28.9586   1
  15 -11  -1 462.802 22.7566   2
 -11  15   1 427.995 27.2490   3
  -4  15  -1 445.333 26.2322   3
 -15   7  -1 108.516 13.7684   3
   8   7   1 62.5539 12.4039   1
 -15   8   1 97.0864 17.2804   1
 -15   7  -1 101.242 17.8779   1
   7   8  -1 92.6868 11.8826   2
   8   7   1 100.571 12.3985   2
 -15   7  -1 117.036 13.8763   2
 -15   8   1 90.3153 13.5864   3
  -7  -8   1 99.1491 15.5965   1
  -7  15  -1 104.157 15.2394   3
  -7  15  -1 89.6368 16.3629   1
  -8  15   1 87.6882 14.4857   3
  -8  -7  -1 98.4871 15.0747   1
  -8  15   1 90.3560 15.0580   1
   5  10   1 715.888 34.5193   2
 -15  10  -1 681.440 38.7436   1
 -15   5   1 758.805 40.3381   1
 -15  10  -1 710.959 33.2845   2
 -15   5   1 725.916 33.8233   3
 -15  10  -1 703.051 34.9860   3
  10   5  -1 722.015 33.8977   2
 -10  15  -1 693.845 36.1572   3
 -10  -5   1 746.804 37.7930   1
 -10  15  -1 690.570 37.4988   1
  -5  15   1 760.918 33.9486   1
  -5  15   1 789.663 35.2411   3
  -5  15   1 732.784 32.8590   1
  13   2  -1 258.055 21.2188   2
 -15  13  -1 254.627 18.6210   2
   2  13   1 266.165 17.5373   2
 -15   2   1 254.417 25.8967   1
 -15  13  -1 258.927 26.2441   1
 -15  13  -1 237.297 22.1507   3
 -13  15  -1 269.182 26.1616   1
 -13  -2   1 250.577 25.5873   1
 -13  15  -1 262.603 17.4383   2
  -2  15   1 274.458 20.7369   3
 -13  15  -1 260.211 22.1821   3
 -16   0  -1 36.8625 12.5899   2
 -16  16   1 23.6169 13.7353   3
 -16  16   1 39.1247 17.1249   1
 -16   3  -1 317.872 28.9544   1
 -16  13   1 286.093 36.7116   3
 -16  13   1 331.538 29.5725   1
  13   3   1 327.547 22.5513   2
 -16   3  -1 343.106 22.9970   2
 -13  16   1 301.571 27.2184   1
  -3  16  -1 334.034 23.7476   3
 -13  16   1 309.142 24.7934   3
 -13  -3  -1 319.418 25.9344   1
  16 -13  -1 323.169 19.2494   2
 -13  -3  -1 315.024 21.4056   2
  -3 -13   1 340.595 26.3511   1
 -16  10   1 372.490 29.3114   1
 -16   6  -1 319.072 21.5448   3
 -16   6  -1 357.916 23.3157   2
 -16   6  -1 310.443 28.4496   1
 -16  10   1 361.515 24.6268   3
  10   6   1 339.395 23.8307   2
   6  10  -1 410.010 21.7951   2
  -6  16  -1 344.112 25.0297   3
  -6  16  -1 386.940 27.5498   1
  -6 -10   1 328.491 25.1684   1
 -10  -6  -1 396.797 24.9202   1
 -10  16   1 351.584 25.5925   3
 -10  16   1 358.086 26.6417   1
 -16   9  -1 481.187 27.6226   3
 -16   9  -1 485.926 26.5533   2
 -16   7   1 471.869 32.6697   1
   7   9   1 424.374 26.3609   1
 -16   9  -1 469.740 32.7542   1
   7   9   1 494.247 25.3992   2
 -16   7   1 479.836 27.5607   3
   9   7  -1 488.079 26.2969   2
  -7  -9  -1 488.901 28.5231   1
  -7  16   1 496.485 28.3847   1
  -9  16  -1 468.968 30.5291   1
  -9  16  -1 466.516 29.0451   3
  -7  16   1 526.155 28.9662   3
  -9  -7   1 542.899 31.3169   1
  12   4  -1 517.062 28.4067   2
   4  12   1 520.831 25.7305   2
 -16  12  -1 494.224 26.8172   2
 -16  12  -1 496.655 29.3842   3
 -16   4   1 505.347 38.2212   1
 -12  16  -1 491.520 32.9442   1
 -12  16  -1 523.945 24.3796   2
  -4  16   1 518.167 29.0767   3
 -12  16  -1 515.035 41.7766   3
 -12  -4   1 492.832 32.0375   1
 -16  15  -1 293.995 20.5957   2
 -16  15  -1 283.690 24.3814   3
 -16   1   1 316.496 28.9377   1
 -16  15  -1 285.356 28.5189   1
  15   1  -1 287.880 22.9025   2
 -15  16  -1 306.195 20.0294   2
 -15  16  -1 277.376 28.8484   1
 -15  -1   1 307.643 28.1279   1
 -15  16  -1 265.909 24.5858   3
 -17  15   1 49.6542 15.6334   3
 -17   2  -1 40.8366 16.8375   1
 -17  15   1 30.7208 17.1523   1
 -17   2  -1 46.5446 13.2902   2
 -15  -2  -1 50.9116 15.0851   1
 -15  17   1 48.9809 15.0372   3
  -2 -15   1 63.2752 14.5445   1
 -15  17   1 44.4089 18.6539   1
  -2  17  -1 56.2626 13.8315   3
 -17   5  -1 131.840 20.3411   1
   5  12  -1 129.854 15.7274   2
 -17   5  -1 132.832 15.8484   2
 -17  12   1 134.958 27.8796   3
  12   5   1 133.540 17.6222   2
 -17  12   1 145.458 21.4448   1
 -12  17   1 129.527 18.7077   1
  -5  17  -1 120.309 17.0290   3
  -5  17  -1 148.187 22.7812   1
 -12  -5  -1 127.851 19.8461   1
 -12  17   1 144.877 18.5281   3
  -5 -12   1 152.854 19.8002   1
  17 -12  -1 120.875 13.5332   2
   8   9  -1 288.075 20.6121   2
 -17   9   1 278.137 23.1458   3
 -17   9   1 262.566 28.3652   1
   9   8   1 256.730 20.1309   2
 -17   8  -1 335.651 22.2813   2
 -17   8  -1 323.541 21.9194   3
 -17   8  -1 287.578 29.2956   1
  -8  17  -1 338.947 26.9997   1
  -8  17  -1 327.697 24.8274   3
  -8  -9   1 300.529 25.2641   1
  -9  -8  -1 261.126 22.8112   1
  -9  17   1 273.734 23.9954   1
  -9  17   1 246.148 23.4875   3
 -17  11  -1 492.995 34.2131   1
 -17  11  -1 515.835 27.7809   2
 -17   6   1 511.814 35.3536   1
 -17   6   1 501.348 28.4918   3
 -17  11  -1 544.218 30.3563   3
   6  11   1 583.739 30.0102   2
  11   6  -1 483.825 28.3065   2
 -11  17  -1 499.881 31.4882   3
 -11  -6   1 546.884 32.2406   1
  -6  17   1 532.045 29.6430   1
 -11  17  -1 514.852 33.3248   1
  -6  17   1 524.779 30.5015   3
 -17  14  -1 165.402 18.1249   2
 -17  14  -1 172.450 25.8124   1
   3  14   1 148.938 16.7999   2
 -17  14  -1 154.751 21.2107   3
  14   3  -1 170.246 20.0707   2
 -17   3   1 145.347 21.0975   1
 -14  17  -1 159.520 22.1001   3
  -3  17   1 134.664 20.4090   3
 -14  17  -1 147.791 24.9870   1
 -14  17  -1 191.139 16.1515   2
 -14  -3   1 142.604 22.3641   1
 -17  17  -1 17.9852 14.6581   3
 -17   0   1 23.4666 16.7927   1
 -17  17  -1 -14.047 16.1550   1
 -17  17  -1 4.13257 10.9012   2
 -18  17   1 75.5896 20.0142   1
 -18  17   1 92.2457 18.6345   3
 -18   1  -1 106.040 20.4373   1
 -17  18   1 92.3914 19.0077   3
 -17  18   1 70.7733 20.4786   1
 -17  -1  -1 90.8120 18.9164   1
 -18  14   1 108.041 17.7654   3
 -18  14   1 100.540 20.7420   1
 -18   4  -1 100.259 15.6068   2
   4  14  -1 96.6503 12.5214   2
 -18   4  -1 60.6187 18.5836   1
  -4  18  -1 75.5880 17.6192   1
 -14  18   1 93.8016 17.3532   3
  -4 -14   1 103.378 16.9998   1
 -14  -4  -1 97.7586 16.8109   1
 -14  18   1 76.8763 23.8741   1
  -4  18  -1 53.9753 15.2224   3
 -18   7  -1 159.195 18.6306   3
   7  11  -1 167.087 17.7177   2
 -18   7  -1 164.822 26.5090   1
  11   7   1 146.473 21.1831   2
 -18   7  -1 160.722 19.7799   2
 -18  11   1 161.510 22.4822   1
  -7  18  -1 151.105 24.1063   1
  -7  18  -1 164.692 22.8372   3
 -11  18   1 187.969 24.2400   1
 -11  -7  -1 201.650 20.4466   1
 -11  18   1 168.128 21.9320   3
  -7 -11   1 156.397 20.7319   1
  10   8  -1 143.719 18.2934   2
 -18   8   1 125.213 20.9261   1
   8  10   1 135.193 17.0469   2
 -18  10  -1 117.818 16.0039   3
 -18  10  -1 115.048 19.6679   1
 -18   8   1 120.876 16.1423   3
 -18  10  -1 121.793 15.5325   2
  -8 -10  -1 178.692 18.4407   1
 -10  -8   1 164.780 22.8316   1
 -10  18  -1 111.737 18.9728   1
 -10  18  -1 114.326 18.5595   3
  -8  18   1 125.046 17.6366   1
  -8  18   1 135.902 18.6511   3
   5  13   1 20.4861 10.8413   2
 -18  13  -1 31.3022 13.9460   3
 -18   5   1 32.8354 16.1075   1
 -18  13  -1 31.9353 11.8055   2
 -18   5   1 19.7299 11.9560   3
  13   5  -1 13.0149 12.2068   2
 -18  13  -1 33.3824 17.1516   1
 -13  -5   1 30.4454 16.7510   1
  -5  18   1 20.3841 14.4289   3
 -13  18  -1 12.7659 16.3616   1
 -13  18  -1 18.7121 14.4830   3
 -18   2   1 185.709 28.0519   1
 -18  16  -1 179.184 23.9323   3
 -18  16  -1 184.891 19.4759   2
 -18  16  -1 164.220 27.8488   1
 -16  18  -1 176.762 28.2928   1
 -16  18  -1 181.273 23.9070   3
 -16  -2   1 196.809 26.9044   1
 -19  19   1 161.199 22.7763   3
 -19   0  -1 242.424 28.6261   1
 -19  19   1 181.940 25.5044   1
 -19  16   1 9.24601 14.7137   3
 -19   3  -1 40.5655 17.8251   1
 -19  16   1 17.6850 18.2432   1
  -3  19  -1 -3.6090 14.5808   3
 -16  19   1 12.0620 15.7525   3
 -16  19   1 0.92129 17.2637   1
 -16  -3  -1 33.9214 14.9463   1
  -3  19  -1 37.9116 16.4938   1
 -19  13   1 162.947 22.7043   3
 -19  13   1 161.044 23.6141   1
 -19   6  -1 174.336 21.3279   2
   6  13  -1 178.719 18.4641   2
 -19   6  -1 183.624 27.6596   1
  -6 -13   1 158.951 21.2049   1
 -13  19   1 156.834 21.3164   1
  -6  19  -1 147.098 22.6016   3
 -13  -6  -1 162.623 21.5323   1
 -13  19   1 138.330 20.0020   3
  -6  19  -1 159.219 25.8169   1
   9  10  -1 64.9074 14.8627   2
 -19   9  -1 62.5766 18.3476   1
  10   9   1 82.9876 13.6604   2
 -19  10   1 46.7324 17.8106   1
 -19   9  -1 87.8518 14.7063   2
 -19   9  -1 73.0934 14.0974   3
 -10  -9  -1 76.1253 14.3653   1
  -9  19  -1 72.6544 18.5459   1
 -10  19   1 50.4927 16.6316   1
 -10  19   1 50.8848 16.1569   3
  -9  19  -1 59.5389 17.1779   3
  -9 -10   1 86.8103 16.6645   1
 -19   7   1 15.9756 13.3707   3
 -19  12  -1 50.4351 14.3085   3
 -19  12  -1 49.0839 18.8632   1
 -19  12  -1 35.3163 12.9196   2
 -19   7   1 44.5644 18.0466   1
   7  12   1 51.0813 12.7302   2
  -7  19   1 10.7998 15.9587   3
 -12  19  -1 32.2599 17.8420   1
 -12  -7   1 55.9353 16.1905   1
 -12  19  -1 53.6127 16.7420   3
   4  15   1 175.906 19.2531   2
 -19  15  -1 139.181 23.7520   1
 -19  15  -1 124.085 18.9184   3
 -19  15  -1 144.926 19.6148   2
 -15  19  -1 128.831 20.2779   3
  -4  19   1 150.971 22.4490   3
 -15  19  -1 109.670 21.9562   1
 -15  -4   1 165.494 25.8482   1
 -19   1   1 96.2378 20.4286   1
 -19  18  -1 86.0216 22.4230   1
 -19  18  -1 114.673 23.1871   3
 -18  -1   1 114.645 21.2340   1
 -18  19  -1 115.278 23.7696   1
 -20  18   1 108.206 20.3866   3
 -20   2  -1 136.180 22.3568   1
  -2  20  -1 102.429 18.1591   3
 -18  20   1 115.332 23.5044   1
 -18  20   1 97.7895 20.1557   3
  -2  20  -1 171.472 26.3012   1
 -20   5  -1 255.024 31.0117   1
 -20  15   1 251.332 31.4628   1
 -20  15   1 231.862 26.2895   3
 -15  20   1 213.239 26.7229   3
 -15  20   1 199.062 28.9547   1
  -5 -15   1 242.984 25.9886   1
  -5  20  -1 214.946 26.2257   3
  -5  20  -1 213.929 28.0863   1
 -15  -5  -1 281.082 25.6641   1
 -20   8  -1 142.915 23.1176   1
   8  12  -1 141.875 18.4532   2
 -20   8  -1 125.663 17.4308   2
 -20  12   1 123.381 19.1118   3
 -20   8  -1 111.265 16.2853   3
 -20  12   1 154.479 24.4098   1
  -8 -12   1 171.182 25.0910   1
  -8  20  -1 99.1218 19.3512   3
 -12  -8  -1 183.519 21.9896   1
  -8  20  -1 110.747 20.3764   1
 -12  20   1 110.183 20.0242   1
 -12  20   1 123.060 20.2016   3
 -20  11  -1 58.1805 14.5064   2
 -20   9   1 76.9419 20.8458   1
 -20  11  -1 73.8042 15.7395   3
 -20   9   1 67.7007 18.6810   3
 -20  11  -1 61.0944 19.5868   1
 -11  20  -1 67.3716 18.1515   3
  -9  20   1 54.7217 18.0838   3
  -9  20   1 47.4251 16.8175   1
 -11  -9   1 103.143 18.5405   1
 -11  20  -1 52.4051 19.3660   1
 -20  14  -1 157.947 18.1852   2
 -20   6   1 130.975 17.8328   3
 -20   6   1 108.749 21.7102   1
 -20  14  -1 146.791 22.0459   3
 -20  14  -1 115.438 23.1225   1
  -6  20   1 122.531 19.6567   3
 -14  20  -1 119.885 22.6665   1
 -14  -6   1 181.576 24.4698   1
 -14  20  -1 130.744 21.0365   3
 -20   3   1 16.0952 19.2171   1
 -20  17  -1 7.38193 17.1687   3
 -17  -3   1 49.5417 17.2758   1
 -17  20  -1 -16.201 18.6950   3
 -17  20  -1 -0.4936 18.6286   1
 -21  17   1 433.638 37.4981   1
 -21   4  -1 352.667 49.6772   1
 -21  17   1 452.701 33.4504   3
  -4  21  -1 452.650 34.5806   1
 -17  -4  -1 489.684 32.3718   1
  -4  21  -1 390.594 30.7211   3
 -17  21   1 402.026 33.3330   3
 -17  21   1 408.155 35.5750   1
 -21  14   1 258.249 38.3075   1
 -21   7  -1 216.609 31.9962   1
 -21   7  -1 217.412 23.0051   3
 -21  14   1 212.232 26.9922   3
  -7 -14   1 291.238 25.9467   1
 -14  -7  -1 293.074 24.6940   1
 -14  21   1 207.490 27.5973   3
  -7  21  -1 210.721 28.3445   1
 -14  21   1 167.405 28.5499   1
  -7  21  -1 196.288 27.2003   3
 -21  11   1 184.236 30.6564   1
 -21  11   1 179.555 25.1758   3
 -21  10  -1 171.806 23.3324   3
 -21  10  -1 193.554 31.3617   1
 -21  10  -1 219.815 23.4200   2
 -10  21  -1 160.710 24.2398   1
 -10  21  -1 194.595 27.5476   3
 -11  21   1 159.035 26.2077   1
 -11  21   1 180.025 26.7217   3
 -10 -11   1 233.628 24.6593   1
 -21  13  -1 280.905 24.7670   2
 -21  13  -1 268.606 41.3373   1
 -21   8   1 188.407 24.6193   3
 -21   8   1 242.661 36.7308   1
 -21  13  -1 231.547 25.2513   3
 -13  21  -1 205.620 31.0818   1
  -8  21   1 226.471 27.5342   3
 -13  -8   1 329.242 28.5526   1
 -13  21  -1 276.620 29.2870   3
 -21   5   1 39.5131 19.6055   1
 -21  16  -1 28.0982 19.0980   3
 -21  16  -1 23.2600 20.3480   1
  -5  21   1 12.2974 16.7244   3
 -16  21  -1 13.7308 19.9338   1
 -16  21  -1 26.3794 18.3055   3
 -16  -5   1 69.6783 17.4101   1
 -22  13   1 326.479 29.5738   3
 -22  13   1 350.565 35.1265   1
 -22   9  -1 278.290 26.5738   3
 -22   9  -1 362.760 35.4396   1
  -9 -13   1 362.189 26.6573   1
 -13  22   1 276.690 31.5171   1
  -9  22  -1 246.567 31.2767   1
  -9  22  -1 307.015 30.5609   3
 -13  22   1 238.914 36.6802   3
 -22  10   1 -9.0219 15.0548   3
 -22  12  -1 13.5712 14.8567   3
 -22  12  -1 -0.2552 18.6312   1
 -22  10   1 42.2000 19.9240   1
 -10  22   1 -25.062 19.6709   1
 -10  22   1 11.7234 17.5095   3
 -12  22  -1 12.5681 19.4037   1
  -1   0   2 2566.53 91.6966   3
   0  -1  -2 2645.36 90.7192   1
  -1   0   2 2458.65 91.4493   1
  -1   1  -2 2506.01 90.6975   2
   1  -1   2 2369.00 90.5823   2
  -1   1  -2 2552.61 91.4248   3
   0  -1  -2 2634.25 92.0181   2
   1   0  -2 2617.29 92.7991   1
   0   1   2 2556.69 91.5453   3
   1  -1   2 2490.36 91.3398   3
  -1   0   2 2383.82 90.5850   2
   1   0  -2 2584.84 91.7187   3
   0   1   2 2518.87 90.5792   1
   1  -1   2 2415.11 91.3120   1
   1   0  -2 2582.76 90.7966   2
   0  -1  -2 2610.67 91.5604   3
   2  -2  -2 77.1168 8.71992   2
  -2   0  -2 73.8693 8.83921   2
   0  -2   2 81.3006 7.40825   2
  -2   0  -2 84.5091 8.20462   1
   2  -2  -2 99.2964 10.4465   3
   0   2  -2 78.2646 7.66319   2
   2  -2  -2 82.5859 10.1605   1
   0   2  -2 64.0922 9.76350   3
  -2   2   2 74.7114 8.30275   2
   0  -2   2 60.3284 10.1868   1
   0   2  -2 70.1784 10.2433   1
   2   0   2 75.7583 9.28499   3
  -2   2   2 55.8780 9.48735   1
   0  -2   2 65.5567 9.49573   3
   2   0   2 77.6123 11.8536   2
  -2   2   2 92.1410 11.5576   3
  -2   0  -2 64.9431 9.79969   3
   1  -3  -2 2325.85 84.1394   3
  -3   2  -2 2381.86 84.2308   3
   2   1  -2 2301.84 85.1602   1
   2  -3   2 2373.59 84.3565   3
   1   2   2 2311.01 83.6308   2
   2   1  -2 2325.55 84.5204   3
  -3   1   2 2359.29 84.8072   3
   2  -3   2 2314.42 82.9743   2
  -3   2  -2 2248.77 83.5049   2
   2   1  -2 2264.12 83.3899   2
  -3   1   2 2316.95 84.9892   1
   1  -3  -2 2013.91 83.3322   2
   1   2   2 2462.30 84.2248   3
   2  -3   2 2336.67 84.9984   1
   3  -1  -2 2277.37 83.6204   2
  -2   3  -2 2292.72 84.8207   1
  -1  -2  -2 2290.52 83.5882   2
  -1   3   2 2328.23 83.6123   2
  -1   3   2 2367.59 84.4875   3
   3  -1  -2 2320.11 84.4193   3
  -2  -1   2 2358.67 85.1945   1
  -2   3  -2 2278.37 83.1608   2
  -2  -1   2 2390.03 84.3833   3
  -1  -2  -2 2307.09 83.9051   3
   3  -2   2 2317.23 83.4451   2
   3  -2   2 2461.46 84.2560   3
  -2   3  -2 2309.55 84.2905   3
   3  -1  -2 2278.49 84.8257   1
   1   3  -2 170.665 12.8347   3
  -4   3   2 208.590 13.5253   3
  -4   1  -2 206.647 13.3059   1
  -4   3   2 194.243 13.9199   1
   3   1   2 197.419 11.9049   2
  -4   1  -2 202.743 12.0373   3
   1   3  -2 187.179 14.4502   1
   3   1   2 221.343 11.5955   3
   1  -4   2 205.534 12.3214   3
   3  -4  -2 208.065 11.8175   1
  -4   1  -2 198.144 12.5199   2
   3  -4  -2 211.502 13.0974   3
   1  -4   2 206.406 13.8078   1
  -3  -1  -2 195.148 11.8545   3
   4  -3  -2 213.166 13.8946   1
   4  -3  -2 203.360 11.6457   2
   4  -1   2 196.984 11.6663   2
  -3   4   2 197.146 12.4618   1
  -1   4  -2 175.090 12.7064   3
  -3   4   2 234.005 13.5859   3
  -1  -3   2 204.615 14.1262   1
  -1  -3   2 201.971 12.3254   3
  -1   4  -2 178.928 13.7389   1
   4  -3  -2 214.277 13.6263   3
   4  -1   2 214.983 11.5847   3
  -1   4  -2 176.273 10.0977   2
  -3   4   2 194.649 11.4227   2
  -4   4  -2 338.986 18.6346   1
   4  -4   2 345.204 16.5183   3
   0  -4  -2 340.760 15.8582   3
   4   0  -2 328.984 16.8848   3
  -4   0   2 311.533 17.2231   3
  -4   0   2 314.756 18.5477   1
   0   4   2 329.433 16.7935   3
   4   0  -2 329.008 18.6901   1
  -4   4  -2 327.071 16.4590   3
   0   4   2 329.284 15.4239   2
  -4   4  -2 339.392 15.3964   2
   5   0   2 1929.64 69.4306   3
   5   0   2 1801.45 70.1507   1
  -5   0  -2 1841.45 70.2605   1
  -5   5   2 1963.40 70.8120   1
   0   5  -2 1815.02 70.1272   3
   0  -5   2 1857.50 71.7261   1
   5  -5  -2 2031.57 70.7571   1
   5   0   2 1803.04 69.8748   2
  -5   0  -2 1893.39 70.0683   2
   5  -5  -2 2020.39 71.0163   3
   0  -5   2 1909.57 70.3495   3
  -5   5   2 1957.16 70.9679   3
  -5   0  -2 1984.44 69.5858   3
   3  -5   2 858.180 34.4503   3
  -5   3  -2 810.585 35.2314   1
  -5   3  -2 822.166 33.9478   3
  -5   2   2 855.478 34.6834   3
   2   3   2 916.061 33.5267   2
   3   2  -2 915.588 36.2917   1
   2   3   2 958.695 33.6003   3
   2  -5  -2 842.575 32.8369   2
   3   2  -2 881.265 34.3603   3
  -5   2   2 880.793 35.8719   1
  -5   3  -2 819.311 33.5684   2
   2  -5  -2 864.139 34.2106   3
  -3   5  -2 826.382 32.5316   2
  -3  -2   2 892.246 33.8548   3
  -3   5  -2 829.648 35.2978   1
   5  -3   2 820.685 33.1283   2
  -3   5  -2 837.317 34.3645   3
  -2   5   2 913.302 33.3228   2
  -2   5   2 900.768 34.3267   3
   5  -3   2 884.779 34.1514   3
  -2  -3  -2 897.378 33.8972   3
   5  -2  -2 860.232 34.4472   3
   5  -2  -2 848.425 35.5423   1
  -3  -2   2 900.502 35.9792   1
  -6   2  -2 332.023 17.4683   2
   2  -6   2 325.175 19.1796   1
  -6   4   2 384.814 18.6230   3
  -6   2  -2 339.732 17.1631   3
   2   4  -2 355.144 17.8355   3
   2   4  -2 362.758 20.0497   1
   4  -6  -2 410.125 16.5508   2
   2  -6   2 316.067 17.7737   3
   4   2   2 364.069 17.2846   2
   4  -6  -2 427.544 18.4827   3
  -6   2  -2 339.009 19.1345   1
  -6   4   2 381.271 20.2177   1
   4  -6  -2 405.029 17.0461   1
   6  -2   2 316.816 17.1204   2
  -2  -4   2 364.156 19.7750   1
  -4  -2  -2 374.180 17.3201   2
   6  -4  -2 432.659 19.8391   1
   6  -2   2 314.413 18.4609   1
  -4   6   2 392.062 18.7469   3
  -2   6  -2 342.360 17.9586   3
  -4   6   2 398.037 16.5417   2
  -2   6  -2 327.670 19.2536   1
   6  -2   2 330.871 16.8411   3
  -4   6   2 376.365 17.3244   1
   6  -4  -2 387.036 22.6861   2
  -2  -4   2 344.595 17.0798   3
   6  -4  -2 407.859 18.4763   3
   1   5   2 3845.75 136.030   3
   5  -6   2 3844.76 137.266   3
   1  -6  -2 3683.98 135.096   2
  -6   5  -2 3796.59 135.823   2
  -6   5  -2 3833.82 138.358   1
   1   5   2 3756.69 135.746   2
   5   1  -2 3723.31 136.125   3
   5  -6   2 3721.12 134.759   2
  -6   1   2 3809.70 138.573   1
   5   1  -2 3759.38 138.357   1
   1  -6  -2 3753.96 136.204   3
  -6   5  -2 3883.98 137.145   3
  -6   1   2 3777.33 136.848   3
   6  -5   2 3750.32 135.487   2
  -5   6  -2 3810.15 138.280   1
  -5   6  -2 3896.81 138.630   1
  -5  -1   2 3919.72 138.756   1
   6  -5   2 3895.30 137.075   3
  -5  -1   2 3722.61 136.325   3
  -1   6   2 3730.80 136.269   3
  -5   6  -2 3868.64 135.429   2
  -5   6  -2 3833.57 137.266   3
  -1   6   2 3781.01 135.621   2
   6  -1  -2 3736.69 138.275   1
  -1  -5  -2 3862.94 135.697   3
   6  -1  -2 3793.02 136.530   3
  -1  -5  -2 3723.94 135.364   2
   1  -7   2 174.269 12.3723   3
   6   1   2 175.520 12.1126   1
   6  -7  -2 112.768 12.3265   2
  -7   1  -2 149.280 12.3492   2
  -7   6   2 164.809 15.0676   1
   6   1   2 175.124 12.2405   2
  -7   6   2 160.313 13.7415   3
   6  -7  -2 114.803 12.3975   3
  -7   1  -2 140.109 10.6959   3
   6  -7  -2 124.814 10.5108   2
   6  -7  -2 128.298 12.3211   1
   1   6  -2 158.866 14.4612   1
  -7   1  -2 161.247 13.9724   1
   1  -7   2 168.870 14.6472   1
   1   6  -2 158.795 12.0892   3
   7  -6  -2 127.853 10.9119   2
   7  -1   2 173.971 13.0596   1
   7  -1   2 192.308 12.3088   2
   7  -1   2 172.133 10.2549   3
  -1   7  -2 160.480 14.4425   1
  -6   7   2 153.164 13.6466   3
   7  -6  -2 118.630 12.3684   3
  -1  -6   2 184.653 11.8570   3
  -6   7   2 145.129 13.4608   1
   7  -6  -2 132.977 13.1787   1
  -6  -1  -2 147.867 12.1713   2
  -1   7  -2 149.492 12.2539   3
  -6  -1  -2 166.521 13.3395   1
  -1  -6   2 174.183 14.7381   1
  -7   4  -2 2574.25 93.6907   3
   3  -7  -2 2647.04 92.0670   2
   3  -7  -2 2752.18 94.1216   3
   4  -7   2 2528.98 94.1885   3
  -7   4  -2 2557.96 93.2600   2
   3   4   2 2496.21 92.9760   2
  -7   3   2 2644.07 95.7021   1
   4   3  -2 2551.72 95.6163   1
   4   3  -2 2530.66 93.2728   3
  -7   4  -2 2497.90 95.1500   1
  -7   3   2 2522.13 93.9076   3
  -3   7   2 2697.67 92.6736   2
   7  -3  -2 2560.42 93.7679   3
   7  -4   2 2580.03 93.7382   3
   7  -3  -2 2626.48 95.3571   1
  -4   7  -2 2482.82 94.0792   3
   7  -3  -2 2706.01 93.5988   2
  -4  -3   2 2471.91 92.8133   3
   7  -4   2 2502.36 92.9417   2
  -4  -3   2 2533.33 95.6143   1
   7  -4   2 2522.87 95.0473   1
  -4   7  -2 2494.81 95.2674   1
  -3   7   2 2518.86 93.8036   3
   7   0  -2 175.924 16.5652   1
   0   7   2 160.572 11.4152   2
   0  -7  -2 179.244 11.7503   3
   0  -7  -2 172.879 9.95831   2
   7  -7   2 154.520 10.0738   2
  -7   0   2 144.771 13.7023   3
   7   0  -2 177.762 12.8285   3
   7   0  -2 183.268 13.2796   2
  -7   7  -2 179.205 16.5173   1
  -7   7  -2 179.382 11.5903   2
   7  -7   2 159.129 13.2954   3
  -7   7  -2 186.203 15.3411   3
   0   7   2 162.851 12.4932   3
  -7   0   2 148.624 17.2918   1
  -8   0  -2 203.206 17.2594   1
  -8   0  -2 202.510 15.0014   2
  -8   8   2 247.579 16.9235   3
   8   0   2 183.004 15.5304   1
   0   8  -2 191.268 14.6174   3
   8  -8  -2 218.261 15.2546   3
   0  -8   2 173.142 17.0864   1
  -8   8   2 227.663 17.8086   1
   0   8  -2 197.488 17.5155   1
   0  -8   2 194.622 14.4456   3
   8  -8  -2 250.842 16.5171   1
   8  -8  -2 242.282 13.2998   2
   8  -8  -2 243.533 13.2835   2
   8   0   2 195.240 15.0060   2
   3   5  -2 144.397 15.2879   1
  -8   5   2 142.686 13.6703   3
   5  -8  -2 145.287 10.7733   2
  -8   5   2 134.580 16.0634   1
   3  -8   2 168.738 12.8348   3
   3   5  -2 142.924 12.4868   3
   5   3   2 116.897 11.7369   2
  -8   3  -2 176.433 15.0616   1
   5  -8  -2 137.153 11.6553   1
   5  -8  -2 137.274 12.7856   3
  -8   3  -2 168.457 12.8265   2
  -8   3  -2 157.444 11.0342   3
   8  -3   2 165.699 11.6810   2
   8  -3   2 157.860 11.3279   3
   8  -5  -2 152.539 12.0821   2
  -5   8   2 158.503 12.7338   1
  -5   8   2 137.760 13.8055   3
  -5   8   2 148.734 10.9821   2
  -3   8  -2 172.673 12.6019   3
  -3  -5   2 132.812 15.1107   1
  -3  -5   2 123.409 11.0468   3
  -5  -3  -2 141.500 11.5882   2
   8  -5  -2 132.546 14.5157   1
   8  -5  -2 140.855 13.0716   3
   8  -5  -2 147.843 12.0474   2
  -3   8  -2 165.475 15.9839   1
   8  -3   2 159.407 14.0616   1
  -8   2   2 445.683 24.5575   1
   2  -8  -2 423.418 20.3291   3
  -8   6  -2 437.980 23.8758   1
   6  -8   2 470.875 21.9218   3
   6   2  -2 412.346 20.5906   2
  -8   2   2 437.839 21.9960   3
   2   6   2 416.871 19.7884   2
   6   2  -2 425.406 20.0234   3
  -8   6  -2 448.100 22.1332   3
   6   2  -2 404.463 24.1591   1
  -8   6  -2 441.104 20.2983   2
  -6   8  -2 434.366 22.7464   1
  -2  -6  -2 415.962 18.8908   2
   8  -2  -2 427.367 20.9903   2
  -6   8  -2 453.115 21.5921   3
   8  -2  -2 427.424 23.7943   1
  -6   8  -2 457.112 24.2752   1
   8  -2  -2 422.412 20.5364   3
  -2   8   2 450.414 19.1459   2
  -6  -2   2 416.078 20.0529   3
   8  -6   2 441.141 19.2795   2
  -6  -2   2 424.022 24.3682   1
  -6   8  -2 443.756 18.7324   2
   8  -6   2 458.787 21.5767   3
  -2   8   2 431.654 21.1515   3
  -9   2  -2 744.022 32.6625   2
   2  -9   2 731.016 34.6203   1
   7   2   2 861.727 32.9917   2
  -9   2  -2 750.623 31.2402   3
   2   7  -2 773.333 31.9348   3
   2  -9   2 768.565 32.7819   3
   7  -9  -2 789.057 34.1241   2
   7   2   2 778.213 32.4016   1
  -9   2  -2 761.823 34.8419   1
  -9   7   2 804.975 35.7066   1
   2   7  -2 790.017 35.5515   1
   7  -9  -2 780.553 32.8774   1
  -9   7   2 787.195 34.3016   3
   7  -9  -2 770.822 33.3850   3
  -2  -7   2 808.114 31.7054   3
   9  -7  -2 715.511 31.4225   2
  -2  -7   2 830.851 35.2257   1
  -2   9  -2 718.880 34.7496   1
  -2   9  -2 762.227 34.2576   3
  -7   9   2 832.147 34.1754   1
   9  -7  -2 769.290 34.4120   1
   9  -7  -2 745.919 33.0205   3
  -7  -2  -2 771.578 37.8001   2
  -7  -2  -2 787.045 33.2030   1
   9  -2   2 767.663 32.5696   2
   9  -7  -2 765.475 31.6270   2
  -7   9   2 745.069 42.2558   3
   4   5   2 518.034 23.0123   2
   5   4  -2 490.697 27.1999   1
  -9   5  -2 523.567 23.8352   2
  -9   4   2 510.788 28.1364   1
  -9   5  -2 500.618 26.9797   1
  -9   5  -2 511.683 23.5283   3
  -9   4   2 510.251 24.6639   3
   5  -9   2 557.902 25.0014   3
  -4  -5  -2 471.926 22.2554   2
   9  -4  -2 457.733 26.4766   1
   9  -5   2 556.194 23.7476   3
   9  -5   2 554.595 26.4483   1
   9  -4  -2 487.391 24.0281   3
  -5   9  -2 523.702 26.1572   1
  -4   9   2 520.172 22.8735   2
   9  -5   2 548.397 22.9840   2
  -5   9  -2 519.538 24.7619   3
   9  -4  -2 486.005 23.7965   2
  -5  -4   2 518.661 27.2588   1
  -4   9   2 528.553 24.9399   3
   8   1  -2 256.405 17.4261   2
   8   1  -2 245.591 15.3466   3
  -9   8  -2 283.929 21.1302   1
   1  -9  -2 272.289 15.6444   3
  -9   8  -2 272.781 15.9694   2
  -9   1   2 264.666 22.0844   1
   8   1  -2 234.148 22.7855   1
   1   8   2 251.217 15.0909   2
  -9   8  -2 256.584 16.9257   3
  -9   1   2 276.757 18.5698   3
  -8  -1   2 255.813 21.7669   1
  -1   9   2 267.885 16.9410   3
   9  -1  -2 261.466 17.6985   2
  -8   9  -2 258.514 21.1908   1
  -1   9   2 266.086 14.8288   2
   9  -1  -2 271.262 16.0280   3
   1 -10   2 240.351 16.3855   3
 -10   1  -2 200.730 19.4453   1
   9   1   2 192.301 15.9802   2
   1 -10   2 234.191 18.8795   1
 -10   1  -2 200.348 16.1307   2
   1   9  -2 216.506 15.8738   3
   9 -10  -2 185.838 16.7481   1
 -10   9   2 209.482 18.1747   3
   9   1   2 201.055 18.2468   1
   1   9  -2 209.346 21.2515   1
  -9  10   2 231.956 20.0623   1
  -9  -1  -2 200.866 15.8335   2
  10  -1   2 247.520 16.3477   2
  10  -1   2 215.380 17.5399   1
  -1  -9   2 202.131 14.7382   3
  -1  10  -2 213.814 16.3331   3
  -9  -1  -2 181.309 18.7501   1
  10  -9  -2 212.301 14.2516   2
  10  -9  -2 191.763 17.7379   1
  -9  10   2 227.037 18.2662   3
  -1  -9   2 218.910 19.0663   1
   6 -10  -2 1021.35 38.2595   1
 -10   6   2 937.543 39.6870   3
 -10   4  -2 942.946 38.5830   2
 -10   6   2 1016.91 44.8801   1
   6 -10  -2 978.266 39.1023   3
   4   6  -2 914.191 41.6813   1
   6   4   2 888.257 37.9789   2
 -10   4  -2 887.286 37.5420   3
   4 -10   2 889.328 39.0794   3
 -10   4  -2 932.314 42.7921   1
  10  -4   2 846.998 40.1045   1
  10  -6  -2 955.562 38.8848   3
  -6  10   2 957.695 36.8561   2
  -4  10  -2 899.250 40.6474   1
  -6  10   2 971.169 38.5152   1
  -4  -6   2 933.417 41.9531   1
  10  -4   2 876.396 37.6666   2
  -4  10  -2 905.579 38.9640   3
  10  -6  -2 992.020 37.8995   2
  10  -6  -2 976.892 41.2436   1
 -10   3   2 62.2509 13.8892   1
   3   7   2 66.0884 9.10556   2
   7   3  -2 58.4256 9.82617   2
 -10   7  -2 80.6607 10.2064   2
 -10   3   2 67.6403 10.9976   3
 -10   7  -2 73.3990 9.94984   3
 -10   7  -2 71.0240 14.1360   1
  -3  10   2 66.4234 9.12266   2
  -7  10  -2 72.3816 7.82580   2
  -3  10   2 73.1916 11.0486   3
  10  -3  -2 61.2711 9.61949   3
  10  -3  -2 73.0459 10.8108   2
  -7  -3   2 47.1986 13.3180   1
  -3  -7  -2 54.2320 7.54288   2
  -7  10  -2 67.2712 13.6777   1
 -10   0   2 850.140 40.6258   1
 -10   0   2 845.449 35.3955   3
   0  10   2 814.674 33.9226   2
 -10  10  -2 849.052 39.7285   1
 -10  10  -2 848.039 34.3849   2
  10   0  -2 794.967 33.9453   3
  10   0  -2 799.439 35.6460   2
   0 -11   2 36.8913 12.4023   1
 -11  11   2 50.4675 13.6783   1
 -11   0  -2 54.9203 10.7819   2
  11 -11  -2 71.8216 10.8140   2
   0 -11   2 40.5083 9.82096   3
   0  11  -2 54.8298 10.4029   3
  11   0   2 53.6438 10.4899   2
 -11  11   2 53.3254 12.3118   3
 -11   0  -2 48.4920 13.5861   1
   3 -11   2 602.259 35.7751   3
 -11   8   2 566.359 29.0535   3
 -11   3  -2 562.478 27.1909   2
   8   3   2 570.045 26.7400   1
 -11   8   2 578.573 31.4201   1
 -11   3  -2 524.635 24.7432   3
   8 -11  -2 568.673 27.3561   1
 -11   3  -2 581.997 30.9538   1
   8   3   2 596.689 26.9464   2
  -8  11   2 590.202 28.7640   1
  -3  11  -2 536.173 27.2702   3
  -8  -3  -2 583.052 26.1537   2
  -8  -3  -2 560.660 27.8700   1
  -8  11   2 576.360 28.8810   3
  11  -8  -2 572.193 25.8717   2
  -3  -8   2 592.989 29.9748   1
  11  -3   2 552.143 26.6928   2
 -11   5   2 725.339 33.4441   3
 -11   6  -2 761.750 36.6237   1
 -11   5   2 752.365 37.7388   1
   6   5  -2 791.350 32.0342   2
 -11   6  -2 735.483 32.3789   2
   5   6   2 726.347 31.7612   2
 -11   6  -2 701.674 31.9211   3
  -5  11   2 754.246 33.6994   3
  -5  11   2 774.711 30.3650   2
  -5  -6  -2 768.774 30.7992   2
  11  -5  -2 775.426 32.3800   2
  -6  -5   2 718.511 36.2939   1
  11  -5  -2 757.746 32.4814   3
  -6  11  -2 720.700 36.5292   1
   2   9   2 69.0637 9.78077   2
 -11   2   2 51.2604 15.0633   1
 -11   9  -2 76.0087 10.6683   2
   9   2  -2 73.9276 11.4561   2
 -11   9  -2 74.4762 14.9951   1
 -11   2   2 62.2251 11.5522   3
  -2  11   2 73.7407 11.5346   3
  -9  -2   2 67.7276 15.0203   1
  -2  11   2 73.2710 9.05012   2
  -9  11  -2 76.8217 9.16361   2
  11  -2  -2 68.9097 11.0677   2
  -9  11  -2 87.3159 15.2683   1
  11  -2  -2 61.8584 10.5697   3
  10   2   2 215.925 17.1486   2
  10   2   2 171.779 17.0809   1
   2  10  -2 206.797 13.8171   2
 -12  10   2 231.955 22.6838   1
  10 -12  -2 206.739 13.6403   2
 -12   2  -2 216.767 17.7970   2
 -12   2  -2 204.942 21.6182   1
 -12  10   2 218.611 19.7050   3
 -10  12   2 227.107 21.6473   1
  12  -2   2 211.633 16.8347   2
  12 -10  -2 210.976 15.0283   2
  -2 -10   2 198.295 20.2523   1
 -10  -2  -2 185.734 19.4513   1
 -10  12   2 220.821 19.6672   3
 -10  -2  -2 194.708 16.8771   2
   7   5   2 241.174 17.1740   2
 -12   7   2 223.357 23.1177   1
 -12   5  -2 198.527 15.1331   3
 -12   5  -2 201.949 17.0849   2
 -12   5  -2 226.268 22.2666   1
 -12   7   2 225.710 19.1062   3
  -7  12   2 230.977 19.1666   3
  -7  12   2 204.706 18.2033   1
  -7  12   2 217.743 15.0570   2
  -5  -7   2 207.858 21.6495   1
  -7  -5  -2 210.401 15.0101   2
 -12   4   2 429.006 29.7181   1
   8   4  -2 480.933 24.4558   2
 -12   4   2 411.751 27.4111   3
 -12   8  -2 530.029 29.3318   1
 -12   8  -2 516.115 24.1135   2
   4   8   2 463.425 23.0217   2
  -8  -4   2 513.919 29.4288   1
  12  -4  -2 412.486 23.2155   3
  -4  12   2 458.895 21.5244   2
  -4  12   2 432.176 25.2393   3
  12  -4  -2 431.083 24.0866   2
  -8  12  -2 534.176 29.5229   1
  -4  -8  -2 451.976 21.0912   2
 -12   1   2 324.861 27.4490   1
   1  11   2 320.058 18.9559   2
  11   1  -2 310.772 21.6065   2
 -12  11  -2 364.283 27.0247   1
 -12   1   2 336.252 21.9817   3
 -12  11  -2 347.488 19.7520   2
 -11  -1   2 329.549 26.8593   1
 -11  12  -2 383.923 26.7415   1
  12  -1  -2 324.167 21.9276   2
  -1  12   2 346.606 18.5626   2
  -1  12   2 342.484 21.1402   3
 -11  12  -2 383.558 19.3578   2
 -13   1  -2 216.518 22.4726   1
   1 -13   2 213.529 20.9190   1
 -13  12   2 200.512 20.1884   3
 -13  12   2 212.614 23.3823   1
 -13   1  -2 204.282 17.9461   2
 -12  13   2 217.924 20.2874   3
  13 -12  -2 207.836 15.1131   2
 -12  13   2 225.321 22.6166   1
 -12  -1  -2 193.340 17.5442   2
 -12  -1  -2 176.487 21.3968   1
  -1 -12   2 210.980 21.5949   1
   4   9  -2 197.189 15.7017   2
 -13   9   2 192.133 19.6109   3
 -13   4  -2 190.439 13.7518   3
 -13   4  -2 198.496 15.5339   3
   9   4   2 155.074 16.1547   1
 -13   4  -2 186.285 17.5463   2
   9   4   2 196.188 16.7207   2
 -13   4  -2 177.452 22.6843   1
 -13   9   2 187.469 22.9490   1
  -9  13   2 182.564 19.3130   3
  13  -9  -2 184.479 15.6951   2
  -9  -4  -2 179.433 17.8878   1
  -9  13   2 183.353 19.4819   1
  -4  -9   2 204.677 20.0407   1
 -13   7  -2 19.1579 13.6365   1
 -13   6   2 39.5673 11.6100   3
 -13   6   2 23.6171 15.0183   1
   6   7   2 31.7440 9.62438   2
 -13   7  -2 19.7240 9.58841   2
   7   6  -2 19.7873 9.78971   2
  -7  -6   2 15.8350 12.8435   1
  -6  13   2 33.3209 11.9849   3
  -6  -7  -2 36.1399 8.29767   2
  -6  13   2 31.1643 8.06722   2
  -7  13  -2 14.9221 13.7735   1
 -13  10  -2 117.929 12.8023   2
   3  10   2 130.456 17.4217   2
 -13  10  -2 126.604 17.9718   1
 -13   3   2 133.689 16.4411   3
  10   3  -2 124.654 16.1756   2
 -13   3   2 139.334 18.8750   1
  -3  13   2 133.731 12.4941   2
  13  -3  -2 166.248 13.9931   3
  -3  13   2 143.212 17.4315   3
 -10  13  -2 105.913 17.4768   1
  13  -3  -2 147.677 16.4555   2
 -10  -3   2 118.457 17.6746   1
 -10  13  -2 98.7440 12.7261   2
 -13   0   2 131.729 19.1328   1
 -13  13  -2 134.541 19.7181   1
 -13  13  -2 110.280 12.5398   2
   0  13   2 171.265 14.1702   2
  13   0  -2 139.787 17.4949   2
 -14  14   2 184.223 23.5974   1
 -14   0  -2 189.231 18.5238   2
 -14   0  -2 212.726 23.5793   1
   0 -14   2 195.261 21.3845   1
 -14  14   2 178.641 30.5640   3
  14 -14  -2 173.103 14.6396   2
 -14  11   2 92.9785 15.0288   3
   3  11  -2 96.0463 10.6215   2
 -14   3  -2 118.844 17.1467   1
  11   3   2 79.2241 12.3281   2
 -14   3  -2 76.9027 12.3634   2
 -14  11   2 84.3273 16.7862   1
  14 -11  -2 96.7261 11.4138   2
  -3 -11   2 88.0568 15.3449   1
 -11  -3  -2 93.5765 12.1127   2
 -11  14   2 83.2072 15.0056   1
 -11  14   2 76.3038 14.3371   3
 -11  -3  -2 72.1942 13.8944   1
 -14   8   2 597.000 34.9075   1
   8   6   2 541.531 28.6949   2
   6   8  -2 574.177 28.3362   2
 -14   8   2 614.651 31.1732   3
 -14   6  -2 611.238 28.9371   3
 -14   6  -2 631.626 34.6006   1
 -14   6  -2 630.059 29.8716   2
  -6  -8   2 585.611 33.2623   1
  -6  14  -2 641.400 34.5732   1
  -8  -6  -2 567.462 27.3367   2
  -8  14   2 600.589 31.4622   3
  -8  14   2 626.424 30.5339   1
 -14   5   2 247.448 25.5014   1
   9   5  -2 262.783 19.2206   2
 -14   5   2 252.980 20.7255   3
 -14   9  -2 275.154 24.9065   1
 -14   9  -2 269.887 18.4634   2
   5   9   2 256.924 17.7917   2
  -5  14   2 238.069 15.7519   2
  -9  14  -2 313.432 25.7020   1
  -5  14   2 241.108 20.8039   3
  -9  -5   2 242.630 23.9456   1
 -14  12  -2 172.904 16.3751   2
   2  12   2 238.174 16.5730   2
 -14  12  -2 176.447 19.3919   3
  12   2  -2 221.586 19.5694   2
 -14   2   2 159.197 18.3438   3
 -14   2   2 163.911 24.0696   1
 -14  12  -2 163.482 23.5911   1
 -12  -2   2 224.537 24.2675   1
  -2  14   2 186.829 14.6812   2
 -12  14  -2 159.262 23.5819   1
  -2  14   2 180.602 19.0709   3
 -12  14  -2 179.087 14.7336   2
 -15   2  -2 77.1940 16.6457   1
 -15  13   2 72.8761 17.0872   3
 -15  13   2 78.7778 17.3660   1
 -15   2  -2 71.1251 12.6392   2
  13   2   2 78.8167 12.7621   2
  15 -13  -2 85.0583 10.8760   2
 -13  -2  -2 81.6839 15.0955   1
 -13  -2  -2 73.3457 13.2292   2
  -2 -13   2 90.4989 16.5012   1
 -13  15   2 73.8124 16.3343   1
 -15   5  -2 200.670 16.6999   3
  10   5   2 153.990 18.8353   1
 -15  10   2 203.858 21.1542   3
 -15  10   2 195.136 24.8449   1
 -15   5  -2 199.456 18.6201   2
   5  10  -2 170.126 16.6462   2
  10   5   2 227.433 18.6424   2
 -15   5  -2 200.936 23.7307   1
  -5 -10   2 228.773 22.1720   1
 -10  -5  -2 219.288 18.8343   1
  -5  15  -2 184.851 23.2134   1
 -10  -5  -2 192.688 15.9971   2
 -10  15   2 200.070 21.2202   1
  15 -10  -2 192.477 16.8352   2
 -10  15   2 228.861 21.0263   3
 -15   8  -2 199.424 24.2993   1
 -15   8  -2 200.676 18.1903   2
   7   8   2 211.544 17.6576   2
 -15   7   2 223.995 20.0412   3
   8   7  -2 209.257 17.8832   2
 -15   7   2 201.107 25.5022   1
 -15   8  -2 206.672 18.3753   3
  -7  15   2 224.720 15.1033   2
  -7  15   2 203.142 20.9674   3
  -7  -8  -2 218.282 16.0102   2
  -8  -7   2 212.472 24.1256   1
  -8  15  -2 192.961 24.2192   1
  11   4  -2 323.131 22.8658   2
 -15  11  -2 357.090 28.4237   1
 -15  11  -2 361.101 21.9293   2
 -15   4   2 363.934 24.1178   3
 -15   4   2 365.448 28.5480   1
   4  11   2 328.999 21.0186   2
 -15  11  -2 319.576 23.4680   3
 -11  -4   2 336.810 27.5273   1
 -11  15  -2 321.044 27.3565   1
  -4  15   2 386.220 24.4247   3
 -15   1   2 107.702 19.8021   1
 -15  14  -2 143.281 20.5312   1
   1  14   2 111.681 14.8239   2
  14   1  -2 140.968 17.2577   2
 -15  14  -2 118.663 16.3411   3
 -14  15  -2 123.243 16.1243   2
 -14  15  -2 104.266 19.9809   1
 -14  15  -2 123.786 17.0088   3
  -1  15   2 107.259 14.0858   2
 -16   1  -2 145.118 16.7039   2
 -16  15   2 143.383 24.3067   1
 -16   1  -2 162.517 20.7443   1
 -16  15   2 147.338 19.2622   3
 -15  -1  -2 152.935 18.7704   2
  -1  16  -2 178.647 18.5050   3
 -15  16   2 161.090 24.2580   1
 -15  -1  -2 148.353 22.0230   1
 -15  16   2 135.281 18.8831   3
  -1 -15   2 136.782 21.3478   1
  12   4   2 391.106 24.7723   2
 -16  12   2 400.762 33.8281   3
 -16  12   2 404.733 31.2782   1
 -16   4  -2 376.820 30.4067   1
 -16   4  -2 396.742 24.9708   2
 -12  16   2 414.628 28.0484   1
 -12  -4  -2 415.628 26.4122   1
  16 -12  -2 430.986 22.6222   2
 -12  16   2 425.450 28.2076   3
  -4 -12   2 409.537 27.9040   1
 -16   7  -2 247.022 26.8098   1
   7   9  -2 224.335 18.7692   2
 -16   9   2 217.247 22.1797   3
 -16   9   2 229.521 26.6114   1
   9   7   2 220.900 19.1513   2
 -16   7  -2 223.330 19.3919   2
 -16   7  -2 226.491 18.8886   3
  -9  16   2 226.137 21.3225   1
  -7  16  -2 242.242 25.7294   1
  -9  -7  -2 218.143 16.5684   2
  -9  16   2 224.544 22.2348   3
  -7  -9   2 231.450 24.1764   1
 -16   6   2 446.075 27.2753   3
  10   6  -2 463.123 25.8521   2
 -16  10  -2 435.552 25.2361   2
 -16  10  -2 446.523 26.5630   3
 -16  10  -2 457.457 35.7020   1
   6  10   2 456.594 24.7388   2
 -10  -6   2 473.166 31.2475   1
 -10  16  -2 443.009 31.1371   1
  -6  16   2 446.866 28.0410   3
 -16  13  -2 496.020 34.2892   1
 -16  13  -2 511.612 30.4169   3
 -16   3   2 505.872 28.8173   3
 -16  13  -2 518.652 28.4083   2
  13   3  -2 482.229 28.7873   2
 -16   3   2 482.357 34.3603   1
   3  13   2 554.425 26.2805   2
 -13  16  -2 483.126 33.4087   1
 -13  16  -2 479.722 30.3974   3
 -13  16  -2 535.826 24.8808   2
  -3  16   2 498.272 24.2656   2
  -3  16   2 498.695 29.0495   3
 -16  16  -2 72.0623 18.9876   1
 -16  16  -2 63.3499 11.9033   2
 -16  16  -2 73.5945 15.8301   3
 -16   0   2 98.3961 19.4358   1
 -17   0  -2 56.4105 16.5132   1
 -17   0  -2 35.5454 13.5077   2
 -17  17   2 35.7185 18.1010   1
 -17  17   2 57.9260 17.2977   3
 -17  14   2 153.982 22.2092   1
 -17   3  -2 197.124 23.9774   2
  14   3   2 114.140 17.5873   2
 -17   3  -2 158.403 25.2746   1
 -17  14   2 148.994 22.6076   3
 -14  -3  -2 131.880 20.7888   1
 -14  17   2 126.172 18.6167   3
 -14  17   2 140.330 20.3228   1
  -3 -14   2 143.852 22.0925   1
  -3  17  -2 184.735 20.1453   3
  17 -14  -2 156.549 16.5237   2
 -14  -3  -2 117.787 15.0814   2
 -17   6  -2 161.910 18.7021   2
 -17   6  -2 149.894 24.5546   1
  11   6   2 139.991 18.2621   2
 -17   6  -2 140.156 17.6953   3
 -17  11   2 147.618 21.3749   1
   6  11  -2 135.300 16.4532   2
 -11  -6  -2 132.936 15.6074   2
 -11  -6  -2 165.995 18.3747   1
  -6 -11   2 148.015 21.8803   1
 -11  17   2 164.139 21.2199   3
  -6  17  -2 147.390 24.1665   1
 -11  17   2 137.756 21.4221   1
  17 -11  -2 150.973 15.8268   2
 -17   9  -2 128.990 18.0159   3
 -17   8   2 143.054 21.4942   1
 -17   9  -2 144.232 21.3127   1
   8   9   2 138.106 16.8631   2
   9   8  -2 132.355 17.2031   2
 -17   9  -2 121.244 14.9463   2
 -17   8   2 135.330 16.9707   3
  -8  17   2 144.655 18.0568   3
  -9  -8   2 144.442 23.0906   1
  -9  17  -2 136.686 20.4361   1
 -17   5   2 42.7463 13.6982   3
 -17   5   2 41.8798 16.5231   1
   5  12   2 64.6632 14.9536   2
  12   5  -2 63.0464 13.6038   2
 -17  12  -2 27.3950 16.5462   1
 -17  12  -2 37.4560 11.2932   2
  -5  17   2 47.3439 14.4745   3
 -12  -5   2 43.9171 23.3755   1
 -12  17  -2 30.3888 14.2625   3
 -12  17  -2 46.2870 17.0941   1
 -12  17  -2 35.8269 9.11450   2
 -17  15  -2 133.105 16.9483   2
 -17   2   2 151.629 22.4203   1
 -17  15  -2 142.820 22.1753   1
   2  15   2 146.107 17.6824   2
 -17  15  -2 142.391 20.7221   3
  -2  17   2 133.168 17.0418   3
 -15  17  -2 143.122 21.0468   3
 -15  17  -2 116.478 15.3475   2
 -15  -2   2 147.632 21.5610   1
 -15  17  -2 114.992 21.2553   1
 -18  16   2 210.963 29.4916   1
 -18  16   2 196.389 25.9923   3
 -18   2  -2 224.824 22.7462   2
 -18   2  -2 222.747 28.0485   1
  -2  18  -2 267.169 23.3100   3
 -16  18   2 217.345 28.1144   1
  -2 -16   2 207.677 24.5272   1
 -16  -2  -2 217.199 24.5183   1
 -16  18   2 201.057 25.6135   3
 -18  13   2 144.770 19.9315   3
 -18   5  -2 165.816 18.1775   2
   5  13  -2 171.811 17.7655   2
 -18   5  -2 160.275 22.5035   1
 -18  13   2 137.859 22.3994   1
 -13  -5  -2 155.758 17.7217   2
  -5  18  -2 211.997 22.2711   3
 -13  18   2 111.468 19.2184   1
 -13  18   2 145.629 19.7455   3
 -13  -5  -2 182.438 20.1342   1
  -5 -13   2 187.418 23.2481   1
  18 -13  -2 139.606 16.9740   2
 -18   8  -2 7.04701 11.0697   3
   8  10  -2 15.2110 18.3365   2
  10   8   2 27.2731 13.6063   2
 -18   8  -2 7.07432 16.0848   1
 -18   8  -2 15.4390 10.9873   2
 -18  10   2 31.1787 17.8842   1
  -8  18  -2 14.6982 14.0622   3
 -10  18   2 17.5152 13.7601   1
 -10  18   2 22.4483 14.3617   3
  -8 -10   2 38.8170 15.0939   1
  11   7  -2 119.651 15.6391   2
 -18   7   2 131.449 20.4865   1
   7  11   2 111.196 14.5867   2
 -18  11  -2 132.068 21.7036   1
 -18  11  -2 129.504 15.6951   2
 -18   7   2 106.959 16.3410   3
  -7  18   2 95.0598 17.4464   3
 -11  18  -2 116.925 18.1257   3
 -11  -7   2 134.237 20.0893   1
 -11  18  -2 122.208 20.2477   1
 -18  14  -2 50.1744 12.6489   2
 -18  14  -2 52.4799 15.1822   3
 -18  14  -2 54.0967 18.7863   1
 -18   4   2 73.3910 19.6132   1
   4  14   2 68.9001 12.4764   2
 -14  -4   2 71.1666 18.0631   1
  -4  18   2 44.7547 15.8064   3
 -14  18  -2 41.1745 18.5689   1
 -14  18  -2 51.7674 15.7017   3
 -14  18  -2 51.6672 10.6863   2
 -18  17  -2 52.3981 20.5215   1
 -18  17  -2 35.3982 16.4890   3
   1  17   2 42.6481 15.1828   2
 -18  17  -2 45.5406 12.2296   2
 -18   1   2 27.4099 17.5390   1
 -17  18  -2 34.8420 11.8151   2
 -17  -1   2 42.6744 18.5781   1
 -17  18  -2 29.2540 19.5911   1
 -17  18  -2 41.9842 16.7376   3
 -19   1  -2 45.5035 17.7485   1
 -19  18   2 5.49745 17.1710   3
 -19  18   2 18.1467 19.2672   1
 -18  19   2 19.9635 18.4911   1
 -18  -1  -2 69.4408 16.9085   1
 -18  19   2 23.7088 17.6458   3
 -19   4  -2 55.9960 19.1522   1
 -19   4  -2 49.1384 13.7486   2
 -19  15   2 31.0995 16.5466   3
 -19  15   2 39.0015 19.0411   1
 -15  19   2 19.9619 17.3805   1
 -15  19   2 15.3039 15.9447   3
  -4  19  -2 36.4698 18.3296   1
 -15  -4  -2 51.1748 14.5817   1
  -4  19  -2 33.6806 15.2152   3
   7  12  -2 92.1068 14.1621   2
 -19   7  -2 81.1541 15.3391   2
 -19   7  -2 60.9132 19.2817   1
 -19  12   2 87.0033 20.5290   1
 -19   7  -2 70.7869 13.8190   3
 -19  12   2 60.5556 16.9099   3
  -7  19  -2 52.4311 19.6676   1
  -7 -12   2 93.6415 17.6147   1
 -12  19   2 44.0911 16.8187   3
  -7  19  -2 100.627 18.2652   3
 -12  19   2 44.5995 15.9299   1
  10   9  -2 66.6839 14.8136   2
 -19  10  -2 36.0518 19.4448   1
 -19   9   2 49.5100 18.5939   1
 -19  10  -2 51.4376 13.3464   2
 -19   9   2 27.4133 15.6234   3
 -10  19  -2 43.3986 18.0835   1
 -10  -9   2 74.9224 17.5398   1
  -9  19   2 27.2107 15.9603   3
 -10  19  -2 51.1453 16.3919   3
 -19  13  -2 210.339 29.5306   1
 -19  13  -2 220.531 20.6148   2
   6  13   2 213.417 21.1784   2
 -19  13  -2 228.132 23.6324   3
 -19   6   2 200.206 28.3129   1
 -19   6   2 202.057 23.9419   3
  -6  19   2 240.113 33.6738   3
 -13  19  -2 172.407 28.4082   1
 -13  19  -2 221.363 24.9040   3
   3  16   2 33.9352 13.0681   2
 -19  16  -2 35.6110 15.6690   3
 -19   3   2 62.6195 19.7584   1
 -19  16  -2 25.0087 20.0872   1
 -19  16  -2 45.9648 13.0834   2
  -3  19   2 16.8489 15.8122   3
 -16  -3   2 44.6084 18.3362   1
 -16  19  -2 21.0862 19.4007   1
 -16  19  -2 40.8741 16.5756   3
 -16  19  -2 34.6930 11.8210   2
 -19  19  -2 21.0014 13.1419   2
 -19  19  -2 -0.4836 19.9282   1
 -19  19  -2 18.8542 16.4856   3
 -19   0   2 68.3551 19.0569   1
 -20  17   2 28.1694 17.7606   3
 -20   3  -2 41.9525 18.5343   1
 -20  17   2 16.0641 19.2068   1
 -17  -3  -2 55.7691 14.7097   1
  -3  20  -2 55.3693 19.2309   1
 -17  20   2 26.1219 18.8055   1
 -17  20   2 12.6885 17.6112   3
  -3  20  -2 30.1932 15.3066   3
 -20  14   2 124.130 20.7127   3
 -20   6  -2 140.019 18.2670   2
   6  14  -2 161.580 19.2284   2
 -20   6  -2 134.114 23.0064   1
 -20  14   2 154.287 24.4387   1
  -6 -14   2 208.439 25.5541   1
 -14  20   2 128.537 21.8060   1
 -14  20   2 106.472 21.2045   3
 -14  -6  -2 176.970 20.8698   1
  -6  20  -2 166.791 24.6148   3
  -6  20  -2 178.743 28.5090   1
 -20   9  -2 67.7171 20.8314   1
 -20   9  -2 92.4092 18.7485   2
 -20  11   2 62.1365 20.7548   1
 -20  11   2 32.0905 15.7578   3
 -11  20   2 55.6911 16.7469   1
  -9 -11   2 55.5480 15.6792   1
  -9  20  -2 86.0777 18.3741   3
 -11  20   2 46.4890 17.5850   3
  -9  20  -2 59.7524 19.5775   1
 -20  12  -2 87.9130 22.2493   1
 -20   8   2 101.149 21.8907   1
 -20  12  -2 94.0292 17.4894   3
 -20  12  -2 125.841 16.9276   2
 -20   8   2 97.1647 17.7784   3
 -12  20  -2 88.5440 21.3679   1
 -12  -8   2 167.695 25.5196   1
  -8  20   2 94.2761 19.5263   3
 -12  20  -2 105.909 19.8151   3
 -20  15  -2 28.3648 15.6860   3
 -20  15  -2 38.0237 13.4084   2
 -20   5   2 75.6872 20.8041   1
 -20  15  -2 33.3735 20.3732   1
 -20   5   2 52.6735 15.7361   3
 -15  20  -2 39.5906 11.3931   2
 -15  20  -2 5.29865 18.9570   1
  -5  20   2 14.6517 17.0631   3
 -15  -5   2 62.9693 18.0582   1
 -15  20  -2 49.9234 18.4432   3
 -20  18  -2 81.8787 22.2027   1
 -20  18  -2 88.8474 19.2623   3
 -20   2   2 98.4551 20.8873   1
 -18  20  -2 82.8109 23.1120   1
 -18  20  -2 81.0904 19.7029   3
 -21   5  -2 10.6604 14.6180   2
 -21  16   2 4.66100 18.5726   1
 -21  16   2 11.8692 17.3376   3
  -5  21  -2 -0.5991 18.4276   1
 -16  21   2 4.24556 17.2349   3
 -16  21   2 -4.0423 17.7606   1
  -5  21  -2 3.05582 15.3277   3
 -21   8  -2 63.1348 26.8912   3
 -21   8  -2 82.2467 21.8561   1
 -21  13   2 62.9918 18.2485   3
  -8  21  -2 78.5015 20.9992   1
  -8 -13   2 99.3544 17.8547   1
 -13  21   2 86.9755 20.4606   3
  -8  21  -2 104.230 20.0181   3
 -21  10   2 302.381 28.9464   3
 -21  11  -2 345.959 43.6396   1
 -21  11  -2 323.295 25.9563   2
 -21  11  -2 316.097 26.2133   3
 -11 -10   2 368.106 29.5314   1
 -10  21   2 326.664 30.3649   3
 -11  21  -2 377.068 31.2713   3
 -11  21  -2 246.608 32.0184   1
 -21   7   2 142.439 24.0411   1
 -21  14  -2 127.096 17.2886   2
 -21   7   2 118.426 18.9294   3
 -21  14  -2 109.099 23.8192   1
 -21  14  -2 129.278 19.8019   3
  -7  21   2 85.5316 20.4346   3
 -14  21  -2 112.555 23.7137   1
 -14  21  -2 72.2038 23.9861   3
 -22  12   2 149.296 21.4265   3
 -22  10  -2 125.447 25.0118   1
 -22  12   2 176.809 26.3401   1
 -22  10  -2 117.328 18.0519   3
 -12  22   2 109.864 21.0828   1
 -10  22  -2 116.235 23.7095   1
 -10  22  -2 124.341 23.9575   3
   0   0   3 2591.48 92.8735   2
   0   0  -3 2440.02 93.3585   1
   0   0  -3 2418.70 92.8519   2
   0   0   3 2708.23 93.5995   1
   0   0   3 2786.70 94.2411   3
   0   0  -3 2470.62 94.0799   3
  -2   1   3 30.1852 8.47932   3
  -2   1   3 44.6732 7.15909   2
   1  -2  -3 56.0943 8.53511   3
   1   1  -3 39.4019 8.74353   3
   1  -2  -3 43.9669 8.51343   2
  -2   1   3 35.9891 7.55239   1
   1  -2   3 30.0995 7.51576   3
   1  -2   3 33.1873 6.12279   2
   1   1   3 40.9046 6.33036   1
  -2   1  -3 41.5828 6.90865   1
   1  -2   3 30.8844 7.73978   1
  -2   1  -3 40.3796 6.86866   2
   1  -2  -3 52.9404 7.27417   1
   1   1   3 41.4300 8.31244   3
  -2   1  -3 50.3452 8.33719   3
   1   1  -3 41.7380 8.30054   1
   1   1  -3 52.6911 6.75201   2
   1   1   3 38.4136 6.81310   2
  -1  -1  -3 51.4031 8.54466   3
  -1  -1   3 28.2542 7.81755   3
  -1  -1  -3 54.6960 7.38876   2
   2  -1   3 33.2339 6.39972   2
   2  -1  -3 44.6398 8.40985   1
   2  -1   3 33.6193 7.58494   3
  -1   2  -3 39.0840 7.75094   1
  -1   2  -3 35.8067 8.04750   3
  -1   2   3 45.4052 6.92735   2
  -1  -1   3 34.0905 7.76507   1
  -1  -1  -3 49.6258 6.61711   1
   2  -1  -3 54.7819 7.22698   2
   2  -1  -3 46.5660 8.53246   3
  -1   2   3 38.5475 6.75100   1
  -1   2  -3 45.6625 6.93003   2
  -1  -1   3 25.5789 5.97436   2
  -1   2   3 48.4832 9.33230   3
   0  -3   3 926.555 38.7734   1
   3  -3  -3 1014.56 38.1134   2
   3   0   3 994.220 37.6333   3
  -3   0  -3 909.768 36.8586   1
   0   3  -3 869.627 36.2831   2
  -3   3   3 1008.84 37.2344   2
  -3   0  -3 929.700 37.3644   1
  -3   3   3 1020.21 39.1026   3
   0  -3   3 912.623 37.8148   3
  -3   0  -3 929.540 37.3054   2
   3  -3  -3 1057.00 37.9923   1
  -3   0  -3 952.616 37.8985   3
  -3   3   3 991.009 37.6968   1
   0   3  -3 870.550 38.1009   3
   0   3  -3 880.276 38.7275   1
   3   0   3 928.074 37.1432   2
   3  -3  -3 1036.02 38.5320   3
  -3   3  -3 816.189 32.4565   1
   0   3   3 758.009 32.5096   3
  -3   0   3 734.707 32.4877   3
   0   3   3 728.241 30.9943   2
   3  -3   3 805.099 30.5920   2
  -3   3  -3 844.260 30.9648   2
  -3   0   3 732.481 32.7834   1
   3   0  -3 757.552 33.2820   1
   3   0  -3 750.238 32.5876   3
   0  -3  -3 756.530 31.1455   2
   3   0  -3 706.351 30.6904   2
   0  -3  -3 769.491 31.9225   3
  -3   3  -3 856.886 32.5846   3
   3  -3   3 866.880 32.4146   3
   2   2   3 968.945 38.0011   2
   2  -4   3 978.028 39.7669   1
   2  -4  -3 1023.43 37.8740   2
  -4   2  -3 929.014 38.6576   1
   2   2  -3 934.199 39.2598   3
  -4   2  -3 959.885 39.2785   1
   2   2  -3 903.526 37.3985   2
  -4   2   3 1005.47 39.6007   1
   2  -4   3 1005.66 39.0359   3
  -4   2   3 1036.05 40.0379   3
   2  -4  -3 1004.58 38.8975   3
   2   2  -3 884.495 39.8237   1
   2  -4   3 919.560 36.5733   2
  -4   2  -3 965.285 38.0489   2
   2   2   3 1031.28 38.5984   3
  -4   2  -3 958.578 38.7247   3
   4  -2   3 950.893 37.5651   2
   4  -2  -3 989.047 39.1333   3
   4  -2  -3 950.328 37.8107   2
  -2  -2   3 1002.69 40.1186   1
  -2   4   3 1040.10 39.6216   3
  -2  -2  -3 970.852 38.4974   3
   4  -2  -3 1009.76 39.7064   1
  -2  -2  -3 972.593 38.0520   2
  -2   4  -3 923.023 39.4534   1
  -2  -2   3 933.746 38.7441   3
  -2   4  -3 944.692 37.1512   2
  -2   4   3 1046.64 37.9880   2
   4  -2   3 1053.59 38.7698   3
  -2   4  -3 951.059 38.9573   3
   4  -5  -3 51.5338 9.05635   3
   4   1   3 67.0940 8.33273   2
   1   4  -3 35.2621 8.92052   3
   1  -5   3 78.3204 10.5985   1
   1   4  -3 40.9138 9.34067   1
  -5   1  -3 68.5928 8.42286   2
   1  -5   3 75.1503 9.12044   3
  -5   4   3 52.9640 9.60289   1
   4   1   3 53.8015 7.82208   3
   4  -5  -3 49.0941 8.01051   1
   4  -5  -3 52.1366 7.63417   2
  -5   4   3 62.8679 10.0693   3
  -5   1  -3 60.4651 8.84147   1
  -5   1  -3 62.4661 8.61380   3
   1   4  -3 45.3141 6.99679   2
  -4  -1  -3 47.7154 7.35317   1
  -4  -1  -3 45.3731 7.91647   3
  -1   5  -3 60.3476 9.74961   1
  -1  -4   3 40.0852 9.39956   1
  -1  -4   3 48.0242 8.45365   3
  -1   5  -3 51.6117 8.99137   3
  -4   5   3 56.6070 8.39508   1
   5  -4  -3 55.4591 9.27242   1
  -4   5   3 69.8136 9.98829   3
   5  -4  -3 58.2155 8.05908   2
  -1   5  -3 60.0041 6.70170   2
   5  -1   3 73.9862 8.50509   3
  -4   5   3 64.3101 7.96429   2
  -4  -1  -3 40.0597 7.62916   2
   5  -1   3 81.2624 8.47096   2
   5  -4  -3 59.4143 9.32339   3
  -5   4  -3 683.051 31.9482   1
   4   1  -3 695.631 30.9443   3
  -5   1   3 764.300 31.8281   3
   1  -5  -3 762.478 30.3615   3
  -5   1   3 747.797 32.4049   1
   4  -5   3 718.104 30.6994   3
   1   4   3 781.311 29.7423   2
   4   1  -3 712.838 29.5955   2
  -5   4  -3 657.853 30.2710   3
   4  -5   3 711.742 28.4863   2
   4   1  -3 717.837 32.5277   1
  -5   4  -3 705.029 29.5540   2
   1   4   3 755.184 30.6514   3
  -5   4  -3 698.558 31.2109   1
  -4  -1   3 723.033 30.9667   3
  -1  -4  -3 728.077 29.3385   2
  -4   5  -3 671.237 30.5249   3
   5  -4   3 693.993 28.7277   2
  -1  -4  -3 738.953 29.7162   3
   5  -1  -3 750.084 29.8477   2
  -1   5   3 772.749 31.1458   3
   5  -4   3 703.171 30.4016   3
  -4   5  -3 678.400 31.3181   1
   5  -1  -3 742.149 30.8919   3
   5  -1  -3 765.707 32.5016   1
  -4   5  -3 687.010 29.0760   2
  -4  -1   3 711.479 32.2460   1
  -1   5   3 769.060 29.4778   2
   0   6  -3 1480.14 58.9243   3
   6  -6  -3 1610.02 59.6333   3
   0   6  -3 1513.41 56.7901   2
  -6   6   3 1531.65 58.9991   1
  -6   6   3 1631.62 59.9011   3
   6   0   3 1510.48 58.1909   2
   0  -6   3 1555.01 58.8399   3
  -6   0  -3 1552.25 58.0231   3
  -6   0  -3 1506.45 58.3042   2
   6  -6  -3 1515.57 58.7464   1
   6   0   3 1640.62 57.8924   3
   0   6  -3 1466.61 60.7533   1
  -6   0  -3 1461.13 58.3216   1
   0  -6   3 1563.27 60.8213   1
   6  -6  -3 1577.23 57.8526   2
  -6   3   3 425.978 23.3461   1
  -6   3  -3 438.334 21.1067   3
   3   3   3 424.717 22.4342   2
   3   3  -3 436.877 22.3467   3
  -6   3  -3 438.054 20.7376   2
   3   3  -3 432.636 19.9518   2
   3   3   3 460.535 20.3214   3
  -6   3   3 435.786 22.7276   3
   3  -6  -3 441.872 21.4221   3
   3  -6   3 426.719 21.5240   3
  -6   3  -3 446.234 22.7303   1
   6  -3   3 445.324 20.9555   3
  -3  -3   3 439.454 23.3672   1
   6  -3  -3 418.172 20.4277   2
  -3   6  -3 428.495 21.6206   3
  -3  -3  -3 437.936 20.3725   2
  -3   6   3 428.703 19.9043   2
  -3   6  -3 438.228 19.0401   2
  -3   6   3 438.558 22.3357   3
   6  -3  -3 434.172 21.9895   3
   6  -3  -3 440.896 23.1110   1
   6  -3   3 415.922 19.7533   2
  -3  -3   3 431.810 21.0171   3
  -3  -3  -3 438.236 20.1557   3
  -6   6  -3 3984.27 142.974   1
  -6   6  -3 3871.94 142.534   1
   0   6   3 3947.83 140.811   3
   0   6   3 3796.45 139.857   2
  -6   6  -3 3979.84 139.797   2
  -6   0   3 3912.95 143.097   1
   6  -6   3 3683.81 138.971   2
   0  -6  -3 3888.02 139.441   2
   6   0  -3 3848.62 142.876   1
  -6   6  -3 3864.46 141.408   3
   6  -6   3 3952.94 141.585   3
   6   0  -3 3927.88 140.846   3
  -6   0   3 3794.89 141.151   3
   0  -6  -3 3999.01 140.255   3
  -7   2  -3 81.6213 9.73422   2
   2   5  -3 66.0276 11.7903   1
  -7   5   3 76.9895 11.5396   1
   2   5  -3 75.3958 10.5980   3
   2  -7   3 80.0745 10.6350   3
   5   2   3 80.8029 9.29416   2
   5  -7  -3 79.2324 10.5256   3
  -7   2  -3 81.0946 9.51798   3
  -7   5   3 72.3399 11.3068   3
   5  -7  -3 72.8492 10.2223   1
  -7   2  -3 74.0285 11.0178   1
   2  -7   3 83.0487 11.7230   1
  -5   7   3 81.7000 9.74728   1
   7  -5  -3 76.9726 15.7087   2
  -2  -5   3 80.5977 12.0039   1
   7  -5  -3 75.5566 11.6445   1
  -2  -5   3 67.3540 9.63368   3
  -5   7   3 88.8163 9.26948   2
   7  -2   3 77.6942 9.31685   2
  -2   7  -3 70.1641 11.4911   1
  -2   7  -3 74.4216 10.4612   3
  -5   7   3 79.8023 11.0422   3
   7  -5  -3 69.0133 10.3661   3
  -5  -2  -3 66.9251 16.3745   2
  -2   7  -3 82.0737 9.08174   2
  -5  -2  -3 74.4239 9.04364   3
   7  -2   3 81.2899 9.13397   3
  -7   2   3 15.6515 10.1373   3
   2  -7  -3 18.5246 6.72046   2
   5   2  -3 11.8417 8.91945   3
   2   5   3 3.26350 8.34476   3
   5   2  -3 12.9143 10.3523   1
  -7   2   3 12.2114 10.8595   1
  -7   5  -3 19.7753 10.3827   1
   5  -7   3 12.7641 8.54968   3
   2   5   3 19.5746 7.13163   2
   2  -7  -3 17.8043 7.93689   3
  -7   5  -3 17.4833 7.50135   2
  -7   5  -3 9.83166 7.70003   3
   7  -5   3 20.3249 8.41825   3
  -2   7   3 20.8257 9.36271   3
  -5   7  -3 18.5345 6.84011   2
  -5   7  -3 9.67203 8.65793   1
  -5  -2   3 12.9423 8.24606   3
   7  -5   3 22.7568 6.61668   2
  -5   7  -3 18.8327 8.20404   3
  -2  -5  -3 13.9709 6.91510   3
   7  -2  -3 15.5273 8.71571   3
  -2   7   3 22.4341 7.12713   2
   7  -2  -3 11.2258 7.91359   2
  -5  -2   3 6.11238 9.88220   1
   7  -2  -3 19.4872 10.5623   1
   1  -8   3 205.646 15.9779   3
  -8   1  -3 198.470 15.7620   2
  -8   7   3 194.395 18.5120   1
   7   1   3 187.660 14.8085   1
  -8   7   3 202.806 17.6298   3
   1  -8   3 198.607 18.4786   1
  -8   1  -3 195.316 14.3978   3
   7  -8  -3 182.309 15.1347   1
   1   7  -3 175.758 16.2183   3
  -8   1  -3 222.428 17.3925   1
   7   1   3 184.353 12.5080   3
   7   1   3 185.810 15.5905   2
   8  -1   3 212.992 13.7701   3
  -1  -7   3 189.650 18.5626   1
  -1   8  -3 178.815 14.4469   2
   8  -7  -3 194.221 14.1207   2
  -1   8  -3 185.304 16.3076   3
  -7   8   3 171.198 16.8761   1
   8  -1   3 221.563 15.4604   2
   8  -7  -3 164.644 17.9442   1
  -7  -1  -3 190.132 16.0708   1
  -1  -7   3 178.708 15.3800   3
  -7  -1  -3 184.560 15.5857   2
   8  -1   3 194.710 15.7655   1
  -7   8   3 214.246 17.5170   3
   4  -8   3 8.65916 8.73300   3
   4   4  -3 4.99687 10.6470   1
  -8   4  -3 28.8596 10.7090   1
   4   4  -3 20.9359 9.89345   3
   4   4   3 8.14970 8.37327   2
  -8   4   3 13.0234 11.0899   1
  -8   4  -3 16.9777 13.6231   3
  -8   4   3 25.4010 10.6545   3
   4  -8  -3 29.5228 8.69265   3
  -8   4  -3 21.1052 8.26215   2
  -4   8  -3 21.8774 8.86920   3
   8  -4  -3 28.0876 10.6328   1
  -4   8  -3 27.5520 9.75054   1
  -4   8  -3 20.5002 6.70643   2
   8  -4  -3 25.9240 8.22661   2
  -4  -4   3 13.2507 8.02116   3
  -4   8   3 24.9984 9.81289   3
   8  -4  -3 29.2690 9.49337   3
  -4   8   3 24.2338 7.51125   2
  -4  -4  -3 11.7109 7.43633   2
   8  -4   3 16.1705 7.15966   2
   8  -4   3 28.8685 8.54462   3
  -8   7  -3 595.490 29.4179   3
  -8   1   3 601.542 32.3776   1
   7   1  -3 634.682 28.4626   3
   1  -8  -3 593.306 27.6084   3
   7  -8   3 624.057 28.9872   3
   1   7   3 641.328 27.2333   2
  -8   7  -3 601.338 27.3394   2
  -8   7  -3 595.540 31.6312   1
   1  -8  -3 625.815 27.0294   2
   1   7   3 663.661 28.5137   3
  -8   1   3 605.573 30.1775   3
   8  -7   3 627.082 28.7701   3
  -7   8  -3 620.058 28.3154   2
  -1  -7  -3 631.400 26.1740   2
  -7  -1   3 598.094 28.8768   3
  -1   8   3 619.296 26.8150   2
  -1  -7  -3 619.205 26.7833   3
  -7  -1   3 653.404 32.7872   1
  -7   8  -3 609.771 32.0023   1
  -1   8   3 655.479 29.2753   3
  -9   0  -3 451.238 25.4322   1
  -9   0  -3 450.946 24.2404   2
   0  -9   3 445.877 27.5359   1
   0  -9   3 456.854 23.9983   3
   9  -9  -3 479.461 22.8932   2
   0   9  -3 434.948 24.5126   3
   9  -9  -3 482.095 25.1259   1
  -9   9   3 507.535 26.4421   3
  -9   9   3 504.527 26.8929   1
   9   0   3 464.805 24.0218   2
  -9   3  -3 725.172 30.5617   3
   3   6  -3 671.343 31.4880   3
  -9   3  -3 701.553 31.0730   2
  -9   3  -3 709.352 33.3110   1
   6  -9  -3 770.604 29.5359   2
   6   3   3 629.664 30.6774   2
   3  -9   3 719.028 34.8292   3
  -9   6   3 711.611 32.8297   3
  -9   6   3 714.576 34.3119   1
  -6   9   3 684.999 29.7489   2
   9  -6  -3 730.410 33.2646   1
  -6   9   3 707.844 32.4422   3
   9  -3   3 687.204 29.9941   3
   9  -3   3 717.862 30.4539   2
  -3  -6   3 641.476 30.1236   3
  -3   9  -3 720.669 32.0208   3
  -6  -3  -3 617.436 33.5287   2
   9  -6  -3 781.500 30.9268   2
   9  -3   3 678.419 32.3953   1
  -3  -6   3 655.053 34.2064   1
   9  -6  -3 757.283 32.4857   2
  -9   6  -3 283.209 21.5791   1
   6  -9   3 283.062 18.2963   3
  -9   6  -3 265.999 17.2994   3
  -9   6  -3 248.864 17.1102   2
   3   6   3 271.854 16.7995   2
   3  -9  -3 243.498 14.6617   2
   3  -9  -3 232.084 17.7267   3
   6   3  -3 267.826 18.7190   3
  -9   3   3 257.144 20.4027   3
  -9   3   3 228.266 22.3433   1
  -6  -3   3 238.777 16.9921   3
  -6  -3   3 245.710 21.7732   1
  -6   9  -3 273.024 15.2552   2
  -3   9   3 277.187 18.9137   3
  -3   9   3 272.514 15.9355   2
   9  -3  -3 245.010 17.9119   2
  -3  -6  -3 269.081 15.6743   2
  -6   9  -3 242.190 22.0233   1
   9  -3  -3 249.230 17.9916   3
  -9   9  -3 161.291 20.1922   1
   0   9   3 127.481 16.1042   3
  -9   0   3 109.543 13.7652   3
   9   0  -3 140.716 16.8112   3
   0  -9  -3 140.878 13.6088   3
   0  -9  -3 136.711 11.3962   2
  -9   9  -3 131.193 13.7451   2
  -9   0   3 122.781 17.5226   1
   9  -9   3 163.554 15.8539   3
   0   9   3 111.607 13.2798   2
   9   0  -3 138.251 15.9586   2
   2 -10   3 73.3973 11.9945   3
 -10   2  -3 90.4995 15.5321   1
   8 -10  -3 89.1074 9.97450   2
   8 -10  -3 87.5902 11.0131   1
 -10   8   3 63.9842 14.4435   1
   8   2   3 78.2292 12.8357   1
 -10   2  -3 83.6368 10.1585   3
   8   2   3 82.1431 11.3834   2
   2 -10   3 59.4566 13.0748   1
 -10   2  -3 88.4034 12.1086   2
 -10   8   3 89.5716 13.4917   3
   2   8  -3 85.8893 12.4512   3
  10  -8  -3 87.3246 10.6624   2
  -8  10   3 102.332 13.9696   3
  -2  -8   3 94.5468 11.5947   3
  -2  -8   3 85.4424 14.2212   1
  10  -2   3 58.4081 12.0152   1
  -8  -2  -3 103.866 11.7255   2
  -8  10   3 83.4739 12.6381   1
  10  -2   3 68.4630 10.5770   2
  10  -2   3 78.1106 9.90726   3
  -8  -2  -3 90.3888 11.8996   1
 -10   5   3 1120.90 46.3775   3
 -10   5   3 1046.21 47.7094   1
   5   5   3 1084.21 44.1523   2
   5   5  -3 1038.69 44.7257   3
 -10   5  -3 1117.19 44.5896   3
   5 -10   3 1081.17 45.6082   3
 -10   5  -3 1107.56 44.5367   2
 -10   5  -3 1145.55 47.9411   1
   5 -10  -3 1130.57 42.1189   2
  -5  10   3 1089.52 42.9959   2
  10  -5   3 1122.97 44.6854   3
  -5  10   3 1099.60 45.6844   3
  -5  -5   3 1089.80 48.2712   1
  10  -5  -3 1099.96 44.4886   2
  10  -5  -3 1092.69 44.3677   2
  -5  -5   3 1058.19 43.2854   3
   2 -10  -3 660.666 28.9843   3
   2 -10  -3 646.481 25.5776   2
   2   8   3 628.072 28.2424   2
 -10   8  -3 583.663 33.2286   1
   8   2  -3 671.364 34.9037   2
 -10   2   3 626.284 34.5849   1
   8 -10   3 577.755 30.1800   3
 -10   2   3 630.563 31.5410   3
 -10   8  -3 618.914 28.6819   2
   8   2  -3 605.525 28.7373   3
  10  -2  -3 677.734 30.1177   2
  -8  10  -3 604.634 27.0824   2
  -2  -8  -3 640.397 27.1170   2
  -8  -2   3 594.768 28.6861   3
  -8  10  -3 621.757 33.9887   1
  -2  10   3 676.821 27.6679   2
  10  -8   3 616.861 30.2132   3
  -2  10   3 683.682 30.2563   3
  -8  -2   3 647.571 34.3325   1
  10  -2  -3 609.615 29.0621   3
  10 -11  -3 1498.05 63.6488   1
  10 -11  -3 1585.21 60.4486   2
 -11   1  -3 1578.27 61.5841   2
 -11   1  -3 1601.20 63.6205   1
   1 -11   3 1504.84 64.2508   1
   1 -11   3 1531.90 61.4630   3
  10   1   3 1469.25 61.3487   1
  10   1   3 1537.15 61.4006   2
   1  10  -3 1512.49 61.1512   3
 -11  10   3 1620.24 64.0869   1
 -11  10   3 1613.81 63.5671   3
 -10  11   3 1600.30 63.5817   3
  11  -1   3 1525.25 61.1844   2
  11 -10  -3 1581.68 59.6550   2
 -10  -1  -3 1605.49 61.3967   2
 -10  -1  -3 1544.70 62.1825   1
  -1 -10   3 1634.13 65.0958   1
 -10  11   3 1624.13 63.2399   1
 -11   4  -3 301.640 20.1716   2
   4   7  -3 320.902 20.9344   3
   7 -11  -3 294.692 16.4703   2
 -11   4  -3 277.922 18.1530   3
   4 -11   3 307.379 20.6655   3
 -11   4  -3 267.797 23.0948   1
   7   4   3 309.419 19.5178   2
 -11   7   3 288.575 21.5490   3
 -11   7   3 276.906 24.3617   1
  -7  11   3 324.689 22.0883   3
  -7  11   3 286.463 17.4580   2
  -4  -7   3 305.291 18.1831   3
  -4  -7   3 330.696 24.1151   1
  11  -4   3 309.800 18.3592   3
  -7  -4  -3 311.829 18.5962   2
  11  -7  -3 253.154 18.7688   2
 -11   4   3 212.534 20.6320   3
   7 -11   3 208.014 18.6482   3
   4   7   3 224.622 16.8730   2
 -11   7  -3 245.678 22.9378   1
 -11   4   3 205.706 23.1945   1
 -11   7  -3 241.903 17.7162   2
   7   4  -3 248.707 17.6981   3
  -4  11   3 231.805 19.5189   3
  -4  -7  -3 251.224 15.8972   2
  -7  -4   3 216.339 15.6463   3
  11  -4  -3 234.423 18.1574   2
  -7  -4   3 229.522 22.7155   1
  -4  11   3 213.043 15.3508   2
  -7  11  -3 214.540 23.0557   1
  11  -7   3 231.005 17.4894   3
  -7  11  -3 236.550 14.8748   2
   1  10   3 40.4417 9.54335   2
  10   1  -3 26.4153 10.9865   2
  10   1  -3 25.8131 9.53585   3
 -11   1   3 33.9013 15.1236   1
 -11  10  -3 35.4913 14.8304   1
 -11   1   3 34.4590 12.5905   3
 -11  10  -3 31.0584 9.91950   2
   1 -11  -3 31.6562 8.50653   3
 -10  11  -3 31.1730 9.12852   2
 -10  -1   3 73.9797 16.0319   1
 -10  11  -3 37.7050 14.6843   1
  -1  11   3 57.3511 12.3548   3
  11  -1  -3 21.8957 9.35561   3
  11  -1  -3 37.2766 11.3834   2
  12 -12  -3 158.335 20.7851   2
   0 -12   3 149.222 16.6499   3
 -12   0  -3 149.573 16.6580   2
 -12  12   3 149.287 19.9064   3
 -12   0  -3 155.625 20.1264   1
 -12  12   3 155.718 21.2409   1
  12   0   3 149.917 18.2351   2
   0 -12   3 146.670 20.0929   1
 -12   3  -3 556.810 27.9386   2
 -12   3  -3 542.966 31.6632   1
 -12   9   3 581.255 32.4708   1
   9   3   3 540.000 27.4860   2
   3   9  -3 526.502 27.7905   3
 -12   3  -3 563.027 25.6251   3
   9 -12  -3 566.519 24.8784   2
 -12   9   3 552.471 29.5796   3
   9 -12  -3 542.312 26.9406   1
   3 -12   3 581.419 28.7098   3
  -9  12   3 583.368 29.0779   1
  12  -9  -3 548.822 26.1521   2
  -9  -3  -3 515.883 27.3142   1
  -3  -9   3 542.805 31.1006   1
  -9  12   3 576.703 30.3334   3
  -9  -3  -3 533.479 27.4113   2
  -3  -9   3 529.749 26.1931   3
 -12   6  -3 64.6447 11.5448   2
 -12   6  -3 75.7277 15.5311   1
   6   6   3 67.0476 11.4157   2
   6 -12   3 72.7609 13.1468   3
 -12   6   3 65.4480 13.3956   3
 -12   6   3 53.5990 15.5674   1
   6   6  -3 42.1636 11.5048   3
  -6  -6  -3 47.9396 9.49687   2
  -6  -6   3 53.1494 14.7313   1
  12  -6  -3 49.1388 11.0157   2
  -6  12   3 73.1505 13.4408   3
  -6  12   3 56.9531 9.54120   2
  -6  -6   3 62.4048 9.96448   3
 -12   9  -3 118.198 13.1755   2
   9   3  -3 106.090 12.0931   3
   3   9   3 119.674 14.7740   2
 -12   3   3 142.871 19.8096   3
   9   3  -3 118.735 23.8470   2
 -12   3   3 141.162 18.9439   1
 -12   9  -3 121.263 17.6712   1
  -3  12   3 127.555 17.6868   3
  -3  12   3 133.443 14.2038   2
  -9  12  -3 108.729 12.9385   2
  -3  -9  -3 130.539 12.9257   2
  12  -3  -3 149.874 16.9740   2
  -9  12  -3 122.664 18.4211   1
  -9  -3   3 110.005 18.1329   1
  12   0  -3 43.5673 12.0433   2
 -12   0   3 37.2253 11.9727   3
   0  12   3 38.5173 11.4824   2
 -12   0   3 24.8147 14.9785   1
 -12  12  -3 30.7221 14.9647   1
 -12  12  -3 39.7731 9.97034   2
  12   0  -3 39.7323 10.0407   3
 -13   2  -3 64.1339 14.6328   1
 -13   2  -3 63.6079 11.7407   2
  11 -13  -3 85.5400 10.1266   2
 -13  11   3 57.2976 14.0049   3
   2 -13   3 74.9015 12.7349   3
 -13  11   3 78.5167 15.9476   1
  -2 -11   3 58.4410 15.1371   1
  13 -11  -3 60.2786 10.1492   2
  -2 -11   3 80.2171 11.4916   3
 -11  -2  -3 64.9067 11.4102   2
 -11  -2  -3 46.5018 12.9705   1
 -11  13   3 67.5956 14.8360   3
 -11  13   3 79.1901 14.8705   1
 -13   8   3 94.6938 14.3785   3
 -13   5  -3 65.1646 15.2273   1
   5 -13   3 58.0664 12.7310   3
 -13   8   3 92.6871 16.8143   1
 -13   5  -3 59.2582 12.0972   2
   5   8  -3 56.0945 11.0490   2
   8   5   3 74.7238 12.2375   2
  -5  -8   3 47.0305 14.3867   1
  -8  13   3 89.4273 10.8621   2
  -8  13   3 96.1733 14.9833   3
  13  -8  -3 90.6561 12.2666   2
  -8  13   3 90.8337 12.6464   1
   5   8   3 169.672 16.0772   2
 -13   8  -3 157.738 16.7204   2
   8   5  -3 155.331 16.8007   2
 -13   8  -3 150.027 21.6256   1
 -13   5   3 207.368 20.6122   3
 -13   5   3 184.303 23.5404   1
  -8  -5   3 176.624 22.7031   1
  -5  13   3 174.682 15.6919   2
  -5  13   3 185.565 19.1891   3
  -5  -8  -3 166.248 14.4947   2
  -8  13  -3 141.727 22.7225   1
 -13   2   3 346.570 24.3641   3
   2  11   3 362.821 20.9157   2
 -13   2   3 369.603 29.3193   1
 -13  11  -3 351.718 21.3220   2
  11   2  -3 293.848 22.9084   2
 -13  11  -3 379.945 28.4698   1
 -11  13  -3 363.721 20.1047   2
  13  -2  -3 328.114 22.5997   2
 -11  -2   3 329.833 28.7287   1
  -2  13   3 387.722 23.4392   3
  -2  13   3 358.587 19.7992   2
 -11  13  -3 373.717 28.0843   1
  13 -14  -3 31.1902 8.95771   2
 -14   1  -3 17.4412 14.0098   1
 -14  13   3 23.2864 15.0769   1
 -14   1  -3 30.8289 11.3826   2
 -14  13   3 19.0696 17.0256   3
 -13  14   3 31.1758 16.3867   3
 -13  14   3 18.4561 14.2940   1
 -13  -1  -3 35.5489 11.1139   2
 -13  -1  -3 25.2693 12.7130   1
  -1 -13   3 20.3679 13.1961   1
  14 -13  -3 32.1269 9.54005   2
  -1 -13   3 17.8376 10.0052   3
 -14  10   3 -8.5270 11.4832   3
 -14  10   3 -1.5066 13.8689   1
   4  10  -3 6.25356 9.23155   2
 -14   4  -3 7.28571 10.2057   2
  10   4   3 2.63860 10.0707   2
 -14   4  -3 -5.9781 12.8697   1
  14 -10  -3 19.8079 9.21396   2
 -10  14   3 -7.4376 12.0248   3
 -10  -4  -3 3.06118 9.61862   1
 -10  14   3 11.4038 11.7602   1
 -10  -4  -3 8.71088 9.10954   2
  -4 -10   3 1.98776 12.0491   1
   7   7   3 354.891 22.2512   2
 -14   7  -3 316.505 21.7314   2
 -14   7   3 326.309 27.6049   1
 -14   7  -3 283.976 26.7030   1
   7   7  -3 384.177 21.4072   2
 -14   7   3 348.690 24.6886   3
  -7  14  -3 326.744 27.5298   1
  -7  14   3 345.059 24.6672   3
  14  -7  -3 354.300 22.5638   2
  -7  -7  -3 359.414 20.3595   2
  -7  -7   3 338.718 28.1856   1
  -7  14   3 349.276 19.9092   2
   4  10   3 146.166 16.2770   2
  10   4  -3 149.985 26.6219   2
 -14   4   3 156.754 21.0051   3
 -14  10  -3 156.790 16.2902   2
 -14  10  -3 140.717 22.7735   1
 -14   4   3 170.354 24.3453   1
 -10  14  -3 147.616 23.7818   1
  -4  14   3 153.994 19.1637   3
  -4  14   3 154.923 14.6046   2
 -10  14  -3 121.712 14.0019   2
 -10  -4   3 149.082 22.9957   1
 -14   1   3 216.413 29.7082   1
 -14  13  -3 214.260 17.4491   2
 -14   1   3 212.820 19.7417   3
   1  13   3 204.600 17.6011   2
 -14  13  -3 220.533 26.2983   1
  13   1  -3 189.676 20.1911   2
 -13  14  -3 188.871 29.3604   1
  14  -1  -3 203.841 23.6802   2
  -1  14   3 227.067 17.1819   2
 -13  14  -3 212.460 16.8656   2
  -1  14   3 205.721 20.4402   3
 -15  15   3 357.751 27.8958   3
 -15  15   3 335.876 28.4540   1
 -15   0  -3 323.864 23.7701   2
   0 -15   3 343.213 35.5462   1
 -15   0  -3 334.595 27.6701   1
  15 -15  -3 330.580 21.8763   2
 -15   3  -3 281.001 24.0920   2
 -15   3  -3 323.740 27.0255   1
  12   3   3 289.987 21.6586   2
 -15  12   3 308.507 36.4927   3
 -15  12   3 290.757 27.4711   1
 -12  -3  -3 327.312 23.5810   2
  -3 -12   3 313.082 26.8349   1
 -12  15   3 305.920 24.9844   1
  15 -12  -3 279.897 19.3885   2
 -12  -3  -3 292.650 22.1155   1
 -12  15   3 300.299 25.1034   3
 -15   6  -3 547.088 34.2205   1
 -15   6  -3 556.382 28.5249   2
   9   6   3 554.612 28.5688   2
   6   9  -3 521.245 27.7501   2
 -15   9   3 510.037 30.6709   3
 -15   9   3 550.293 34.5160   1
  -6  -9   3 548.700 33.4128   1
  -6  15  -3 549.791 34.4579   1
  -9  -6  -3 537.891 26.6790   2
  15  -9  -3 526.852 28.0080   2
  -9  15   3 538.032 31.1605   3
   6   9   3 430.134 25.7071   2
 -15   9  -3 482.293 32.2595   1
 -15   9  -3 479.510 26.1598   2
 -15   6   3 451.011 32.4061   1
 -15   6   3 508.330 29.7042   3
   9   6  -3 461.375 26.3192   2
  -6  15   3 484.835 23.6147   2
  -6  15   3 471.906 28.6291   3
  -9  15  -3 487.622 32.9953   1
  -6  -9  -3 488.323 23.2393   2
  -9  -6   3 453.724 32.5426   1
  12   3  -3 28.8969 12.2476   2
 -15  12  -3 31.3666 10.5210   2
   3  12   3 42.9376 19.8727   2
 -15  12  -3 21.6747 15.3326   1
 -15   3   3 24.5983 13.6299   3
 -15   3   3 32.7019 16.4272   1
  -3  15   3 16.8486 12.9660   3
 -12  15  -3 28.7111 16.0335   1
  -3  15   3 28.1957 10.0491   2
   0  15   3 15.9715 10.2808   2
 -15   0   3 18.1029 16.0444   1
 -15  15  -3 11.0626 16.6090   1
 -15  15  -3 12.7480 9.65750   2
 -16  14   3 87.3281 17.1531   3
 -16  14   3 105.843 20.1865   1
 -16   2  -3 89.3491 18.1852   1
 -16   2  -3 95.1068 15.0390   2
 -14  -2  -3 91.7637 13.6291   2
  -2 -14   3 114.626 18.6297   1
 -14  -2  -3 85.9849 15.4067   1
 -14  16   3 91.9604 17.4050   3
 -14  16   3 83.7496 17.4793   1
  16 -14  -3 114.640 12.9582   2
 -16   5  -3 37.3465 10.0790   3
 -16  11   3 34.5349 15.0652   3
 -16   5  -3 47.1718 16.2783   1
 -16   5  -3 37.0202 12.3044   2
   5  11  -3 40.0889 11.4765   2
  11   5   3 60.0846 12.6111   2
  16 -11  -3 23.4025 9.87054   2
 -11  16   3 21.5814 13.0015   1
 -11  16   3 31.5881 15.1621   3
  -5 -11   3 51.1119 15.6347   1
 -16   8   3 252.375 23.7014   3
 -16   8  -3 248.122 20.3316   2
 -16   8   3 268.423 26.9790   1
   8   8  -3 253.188 19.8859   2
   8   8   3 245.026 24.1676   2
  16  -8  -3 243.225 21.2687   2
  -8  -8  -3 243.895 18.2995   2
  -8  16   3 279.691 18.1580   2
  -8  16  -3 254.068 27.9527   1
  -8  16   3 267.208 24.0767   3
  -8  -8   3 266.200 26.3984   1
 -16  11  -3 435.979 25.5311   2
 -16  11  -3 450.973 32.9516   1
  11   5  -3 436.752 30.5884   2
 -16   5   3 488.097 29.8965   3
 -16   5   3 473.356 33.5191   1
   5  11   3 487.418 26.1016   2
 -11  16  -3 427.156 33.2420   1
  -5  16   3 447.425 28.6144   3
  -5  16   3 467.161 23.8199   2
 -11  16  -3 460.292 23.1146   2
 -11  -5   3 471.866 32.8500   1
 -16  14  -3 61.3696 18.1474   1
 -16   2   3 62.5986 17.8824   1
   2  14   3 72.6423 12.7258   2
 -16  14  -3 56.0348 12.0019   2
 -16   2   3 69.4319 13.6990   3
  -2  16   3 57.4617 15.3326   3
 -14  16  -3 66.3977 19.5013   1
 -14  -2   3 53.4109 17.7479   1
 -14  16  -3 55.0476 10.7039   2
  -2  16   3 81.2419 11.7983   2
 -17   1  -3 297.773 28.6344   1
 -17  16   3 278.923 27.5957   3
 -17   1  -3 289.947 23.7833   2
 -17  16   3 260.336 29.3573   1
 -16  17   3 260.656 27.7347   3
 -16  -1  -3 242.173 22.9408   2
 -16  -1  -3 269.669 25.4888   1
 -16  17   3 267.505 28.8927   1
  -1 -16   3 237.109 27.2485   1
 -17   4  -3 90.3109 14.9632   2
 -17   4  -3 125.912 20.1997   1
   4  13  -3 113.222 13.3679   2
 -17  13   3 90.0819 19.7533   1
 -17  13   3 128.526 18.4731   3
 -13  -4  -3 115.717 14.0804   2
 -13  17   3 127.711 18.2303   1
 -13  -4  -3 113.544 18.7795   1
  -4 -13   3 115.890 19.4704   1
 -13  17   3 119.379 19.0582   3
  17 -13  -3 131.628 16.4021   2
 -17   7  -3 124.763 16.9929   3
 -17  10   3 132.461 21.2181   1
   7  10  -3 128.746 14.6260   2
 -17   7  -3 127.118 21.0253   1
 -17   7  -3 164.310 18.8687   2
 -17  10   3 137.355 18.6477   3
  10   7   3 146.249 16.7248   2
  -7 -10   3 142.413 22.6474   1
  17 -10  -3 131.516 17.6289   2
 -10  -7  -3 141.301 17.8871   2
 -10  17   3 109.632 18.1199   3
  -7  17  -3 116.588 21.0180   1
 -17  10  -3 231.065 20.3559   2
 -17   7   3 231.977 24.4236   3
 -17  10  -3 244.880 20.9755   3
   7  10   3 236.846 20.5657   2
  10   7  -3 238.235 20.9209   2
 -17  10  -3 211.701 27.7436   1
 -17   7   3 234.065 27.3881   1
  -7 -10  -3 243.788 15.8599   2
  -7  17   3 244.473 18.0368   2
  -7  17   3 205.175 23.5038   3
 -10  17  -3 212.982 27.9510   1
 -10  -7   3 239.792 27.0678   1
 -17  13  -3 142.082 22.5870   1
 -17  13  -3 145.860 18.3043   2
   4  13   3 170.859 19.9152   2
 -17  13  -3 153.038 20.3942   3
 -17   4   3 154.908 23.0024   1
 -17   4   3 149.580 18.5625   3
  -4  17   3 155.542 21.7986   3
 -13  -4   3 192.670 26.1453   1
 -13  17  -3 168.736 15.5312   2
 -13  17  -3 159.354 22.8572   1
  -4  17   3 155.356 16.5105   2
   1  16   3 346.982 23.4352   2
 -17   1   3 354.198 33.7852   1
 -17  16  -3 345.595 23.0525   2
 -17  16  -3 357.897 33.2939   1
 -17  16  -3 368.684 27.8989   3
 -16  17  -3 361.458 33.4279   1
 -16  -1   3 365.713 33.0695   1
 -16  17  -3 370.852 22.8817   2
 -16  17  -3 350.057 28.2461   3
  -1  17   3 347.518 22.6505   2
 -18   0  -3 180.966 25.4348   1
 -18  18   3 164.268 23.7012   1
 -18  18   3 136.609 22.1532   3
   0  18  -3 224.325 21.8706   3
 -18   3  -3 78.2876 15.6919   2
 -18  15   3 69.1169 17.7269   3
 -18  15   3 66.2694 19.9536   1
 -18   3  -3 67.5051 18.6105   1
 -15  -3  -3 91.1558 16.0039   1
  -3 -15   3 68.7530 17.0113   1
 -15  18   3 66.2139 26.4600   1
 -15  18   3 68.9977 18.3167   3
 -18   6  -3 298.605 30.9619   1
 -18   6  -3 357.913 24.5013   2
   6  12  -3 327.438 22.9092   2
 -18   6  -3 348.083 22.6249   3
 -18  12   3 317.828 31.2699   1
 -18  12   3 307.137 27.3085   3
 -12  18   3 335.628 28.3579   3
 -12  18   3 339.580 26.1769   1
  -6  18  -3 340.499 31.5826   1
  -6 -12   3 335.618 28.5347   1
  18 -12  -3 244.809 21.6094   2
 -18   9   3 394.226 31.9731   1
 -18   9  -3 362.716 23.9608   3
 -18   9  -3 296.102 31.1042   1
 -18   9   3 334.929 27.8022   3
   9   9  -3 308.907 23.4254   2
 -18   9  -3 333.128 24.1141   2
  -9  -9   3 352.204 30.3012   1
  -9  18   3 324.321 28.1444   3
  -9  18  -3 340.914 31.8354   1
  18  -9  -3 355.607 25.2452   2
 -18  12  -3 41.5336 18.7170   1
   6  12   3 57.8364 13.9800   2
 -18  12  -3 32.7175 12.1392   2
 -18   6   3 36.6000 15.9959   3
 -18  12  -3 34.3955 13.0691   3
 -18   6   3 57.3762 18.4798   1
  -6  18   3 49.1859 11.2622   2
 -12  -6   3 63.6842 18.6118   1
 -12  18  -3 33.7612 18.1634   1
 -18   3   3 166.341 21.6179   3
   3  15   3 144.023 21.2145   2
 -18  15  -3 133.191 23.4230   1
 -18  15  -3 119.345 15.3520   2
 -18   3   3 182.474 28.6315   1
 -18  15  -3 150.187 21.8015   3
 -15  18  -3 119.204 23.0416   1
  -3  18   3 112.135 18.7108   3
  -3  18   3 139.922 17.4359   2
 -15  18  -3 103.206 13.5270   2
 -15  18  -3 114.079 18.6868   3
 -15  -3   3 130.256 21.6598   1
 -18  18  -3 199.725 24.7631   3
 -18  18  -3 170.105 26.9830   1
 -18   0   3 230.838 41.4417   1
 -19   2  -3 176.955 27.6491   1
 -19  17   3 161.996 22.9350   3
 -17  19   3 218.213 28.4169   1
  -2  19  -3 246.004 23.4136   3
 -17  19   3 163.604 23.1454   3
 -17  -2  -3 245.316 25.1544   1
   5  14  -3 56.5506 12.3692   2
 -19  14   3 51.5873 17.0292   3
 -19  14   3 71.2929 20.4466   1
 -19   5  -3 34.4030 14.0404   2
 -19   5  -3 45.0975 19.3435   1
 -14  -5  -3 74.2846 13.7633   1
  -5  19  -3 59.6002 20.1283   1
 -14  19   3 45.7589 18.2888   3
 -14  19   3 41.9702 17.5948   1
  -5 -14   3 82.0903 19.1678   1
 -19   8  -3 98.9939 15.6613   2
 -19  11   3 88.8636 18.4570   3
 -19  11   3 87.7964 20.7099   1
 -19   8  -3 114.570 21.5303   1
   8  11  -3 83.7751 18.7625   2
 -19   8  -3 110.050 15.4634   3
  -8 -11   3 98.7608 18.8044   1
 -11  19   3 84.2391 19.0687   3
  -8  19  -3 86.2698 21.7439   1
 -19   8   3 19.1912 16.2002   3
 -19  11  -3 -14.049 16.8654   1
 -19  11  -3 23.3173 13.0998   3
 -19   8   3 16.7438 17.7606   1
 -19  11  -3 23.8414 13.0215   2
 -11  -8   3 25.6190 17.1598   1
  19  -8  -3 32.8542 14.2551   2
  -8  19   3 27.3080 11.1003   2
 -11  19  -3 4.44116 17.7653   1
  -8  19   3 3.89413 16.6863   3
 -19   5   3 43.9130 19.7943   1
 -19   5   3 52.1252 16.3397   3
 -19  14  -3 55.0929 20.8081   1
 -19  14  -3 47.2183 14.5452   3
 -19  14  -3 55.0715 13.6453   2
 -14  19  -3 66.7719 17.3387   3
 -14  19  -3 10.8450 18.6514   1
 -14  -5   3 70.1835 19.3299   1
  -5  19   3 57.0977 17.3672   3
 -19   2   3 65.3781 20.0709   1
 -19  17  -3 34.2112 20.2072   3
 -19  17  -3 37.3772 13.0638   2
 -19  17  -3 23.1163 20.6045   1
 -17  19  -3 28.1176 14.2722   2
 -17  19  -3 41.9856 16.0683   3
 -17  19  -3 29.3626 20.5693   1
 -17  -2   3 69.0557 31.5849   1
 -20  16   3 55.7606 20.2519   1
 -20   4  -3 57.6618 20.1206   1
 -20   4  -3 67.1535 19.4324   2
 -20  16   3 33.8494 17.9475   3
  -4  20  -3 82.8717 27.4377   1
  -4 -16   3 43.5929 16.2178   1
 -16  20   3 43.6559 18.3595   1
 -16  20   3 36.2247 18.6974   3
  -4  20  -3 92.8136 17.8877   3
 -20   7  -3 50.3706 14.5807   2
 -20  13   3 37.6439 17.4833   3
 -20   7  -3 37.3497 13.5428   3
 -20   7  -3 33.4916 19.1945   1
 -20  13   3 60.4269 20.5711   1
  -7 -13   3 54.7105 17.0208   1
 -13  20   3 31.2057 17.9181   3
  -7  20  -3 45.2191 20.7267   1
 -13  20   3 38.5673 16.6317   1
  -7  20  -3 77.7997 16.8543   3
 -20  10  -3 89.1500 16.5490   3
 -20  10  -3 74.0895 15.1637   2
 -20  10   3 98.1873 21.5592   1
 -20  10   3 65.6604 18.6730   3
 -20  10  -3 57.6012 20.8356   1
 -10  20  -3 104.490 19.1479   3
 -10  20  -3 85.8146 22.1319   1
 -10  20   3 67.8232 19.3253   3
 -10 -10   3 122.342 20.6692   1
 -20  13  -3 81.9771 16.4939   3
 -20   7   3 70.2553 18.9684   3
 -20  13  -3 89.4387 15.3794   2
 -20   7   3 129.297 30.5091   1
 -20  13  -3 71.5697 23.6711   1
  -7  20   3 56.4691 18.6763   3
 -13  20  -3 91.9681 18.8354   3
 -13  20  -3 52.8580 20.8485   1
 -13  -7   3 109.071 20.5529   1
 -20   4   3 70.1201 15.2518   3
 -20  16  -3 9.21321 20.1637   1
 -20   4   3 31.0251 18.5961   1
 -20  16  -3 45.3043 13.9146   2
  -4  20   3 -4.9466 17.3370   3
 -16  20  -3 37.2209 11.4841   2
 -16  -4   3 51.4867 28.6132   1
 -16  20  -3 39.7522 16.2034   3
 -16  20  -3 19.6050 19.9352   1
 -21   9  -3 136.173 18.6409   3
 -21   9  -3 134.443 18.6365   2
 -21  12   3 99.6808 20.4001   3
 -21  12   3 190.789 28.5745   1
 -12  21   3 118.395 25.3873   3
  -9  21  -3 168.548 24.9671   3
  -9  21  -3 128.322 24.6352   1
  -9 -12   3 169.957 24.8133   1
 -21   9   3 142.223 21.3268   3
 -21   9   3 189.864 30.0811   1
 -21  12  -3 179.569 27.1772   1
 -21  12  -3 145.469 18.4017   2
 -21  12  -3 167.326 23.2539   3
 -12  -9   3 196.647 27.5035   1
 -12  21  -3 129.326 25.4332   3
  -9  21   3 152.943 22.8077   3
 -12  21  -3 115.880 24.4435   1
  -1   0  -4 303.650 16.9469   2
   0  -1   4 280.556 15.5860   2
  -1   1   4 306.028 18.9406   3
   1  -1  -4 308.216 16.5438   2
   1  -1  -4 296.118 17.2604   1
  -1   0  -4 287.115 16.4577   1
   0  -1   4 302.012 17.4458   1
   0   1  -4 294.786 17.6930   1
   1  -1  -4 298.438 19.9693   3
   0  -1   4 297.757 18.1076   3
   1   0   4 257.496 15.9470   2
   1   0   4 307.673 18.2607   3
  -1   0  -4 291.242 18.8020   3
  -1   1   4 272.676 15.8501   2
   0   1  -4 294.229 16.1251   2
   1   0   4 281.938 16.3060   1
  -1   1   4 268.519 16.4049   1
   0  -2  -4 539.249 26.3219   3
   0  -2  -4 534.239 24.8793   2
  -2   2  -4 596.535 25.8439   1
  -2   0   4 536.524 26.8960   3
  -2   0   4 508.765 23.9682   2
   2   0  -4 541.299 26.4045   1
   2   0  -4 517.653 24.5874   2
   0   2   4 545.372 26.7349   3
   2  -2   4 629.869 26.5055   1
   2  -2   4 603.527 26.1355   3
   2  -2   4 602.910 24.3389   2
   0   2   4 546.397 24.6849   2
  -2   0   4 539.235 26.0676   1
   2   0  -4 478.379 28.5643   3
   0  -2  -4 529.020 24.1397   1
  -2   2  -4 638.792 25.1792   2
   0   2   4 526.952 23.7718   1
   2   1   4 50.3649 8.05887   2
   1   2  -4 46.4676 8.29526   2
  -3   1  -4 58.2826 8.89316   2
   1   2  -4 40.0196 10.3261   3
  -3   1  -4 54.5330 8.44060   1
   1  -3   4 57.5365 10.1049   3
  -3   2   4 50.3989 8.37587   2
   1  -3   4 54.9416 7.55966   2
   2  -3  -4 45.1049 8.40559   2
   2   1   4 35.2449 9.62557   3
  -3   1  -4 63.6491 10.5534   3
   2  -3  -4 39.7889 9.80695   3
  -3   2   4 34.9091 8.87519   1
  -3   2   4 40.7162 10.7720   3
   1   2  -4 55.0058 10.3409   1
   1  -3   4 62.7214 10.6352   1
   2  -3  -4 46.7667 8.86953   1
   3  -2  -4 38.2329 8.18414   2
  -1   3  -4 56.0587 9.91363   1
  -2  -1  -4 45.9878 8.53560   2
   3  -2  -4 41.5172 10.1038   3
  -1  -2   4 49.7506 7.53243   2
  -1   3  -4 38.2234 10.1293   3
  -2   3   4 41.8393 7.78235   2
  -2   3   4 49.4339 8.20285   1
  -2  -1  -4 42.0652 7.58620   1
  -1   3  -4 52.7731 8.41820   2
   3  -1   4 55.5050 7.96748   2
   3  -2  -4 40.8306 9.77393   1
  -2   3   4 40.3811 11.0758   3
  -1  -2   4 45.3554 9.99010   1
  -1  -2   4 33.5591 9.51647   3
   3  -1   4 54.7006 9.44189   3
  -2  -1  -4 57.2451 10.2645   3
   0   4  -4 1113.04 44.0507   2
   0   4  -4 1053.26 46.1820   3
   0   4  -4 1057.24 46.8042   1
  -4   4   4 1157.05 45.2048   1
   4  -4  -4 1194.94 45.5746   1
   0  -4   4 1095.54 46.9460   1
  -4   4   4 1201.73 44.9145   2
   4  -4  -4 1148.31 46.1650   3
  -4   0  -4 1104.78 44.2319   1
  -4   0  -4 1124.51 44.9883   1
   4  -4  -4 1157.80 44.7983   2
   0  -4   4 1137.99 46.0848   3
  -4   0  -4 1175.55 45.1796   2
   4   0   4 1221.55 45.6036   3
  -4   4   4 1174.02 47.4607   3
   4   0   4 1109.17 44.5805   2
  -4   0  -4 1111.12 45.6358   3
   1  -4  -4 94.7600 12.9398   3
   1  -4  -4 76.2667 10.0558   2
   1   3   4 73.7801 9.68487   2
   3   1  -4 93.1952 12.9772   1
  -4   1   4 87.8110 12.0232   1
  -4   3  -4 90.5216 12.3322   1
  -4   3  -4 90.4345 11.5722   3
  -4   1   4 71.9259 12.1910   3
   1   3   4 88.9391 12.2712   3
   3   1  -4 86.6286 11.5256   2
  -4   3  -4 104.625 10.3341   2
   3   1  -4 82.5558 12.1679   3
   3  -4   4 76.3963 8.27221   2
   3  -4   4 84.6939 11.5353   3
   4  -1  -4 88.8674 12.2849   3
   4  -1  -4 93.3503 12.5944   1
   4  -1  -4 69.6226 9.55243   2
  -3   4  -4 71.8540 10.7363   3
  -3  -1   4 59.9244 11.2796   3
  -3   4  -4 88.4286 9.90106   2
  -1   4   4 76.8905 12.5429   3
  -3  -1   4 84.8155 12.1670   1
  -3   4  -4 77.7106 12.7570   1
  -1   4   4 86.6397 10.3025   2
  -1  -3  -4 100.403 10.2775   2
   4  -3   4 97.7218 11.4480   3
  -1  -3  -4 90.2121 11.1854   3
   4  -3   4 77.5005 8.99342   2
  -5   2  -4 239.981 17.0991   3
   2   3  -4 266.159 15.3602   2
  -5   2  -4 222.834 16.4327   2
   3  -5  -4 249.283 17.7737   3
   2  -5   4 209.956 16.8264   3
   2  -5   4 217.508 18.2253   1
   2   3  -4 286.571 19.5524   3
  -5   2  -4 228.588 17.9341   1
  -5   3   4 248.115 20.3507   3
   2   3  -4 264.852 19.5614   1
   3   2   4 265.112 17.0156   3
   2  -5   4 205.992 13.1938   2
   3  -5  -4 231.634 17.7515   2
   3   2   4 260.994 16.0533   2
  -5   2  -4 232.883 16.0302   1
  -5   3   4 223.718 18.0204   1
   5  -3  -4 257.493 19.0560   1
   5  -3  -4 254.637 16.0551   2
  -2   5  -4 246.803 18.4559   1
  -2  -3   4 251.409 18.7597   1
  -2   5  -4 231.546 15.1870   2
  -2  -3   4 256.206 17.7383   3
  -3   5   4 234.159 15.4807   2
  -3   5   4 263.521 19.7610   3
  -3  -2  -4 290.959 17.9718   3
   5  -2   4 228.460 16.4205   3
  -2   5  -4 209.453 17.2652   3
   5  -3  -4 251.923 18.0444   3
   5  -2   4 223.658 15.3629   2
  -3  -2  -4 289.047 16.9558   2
  -5   5  -4 4882.86 184.771   1
  -5   5  -4 4924.25 184.211   3
   0   5   4 5158.29 182.917   2
   5   0  -4 4986.09 185.418   1
   0  -5  -4 5175.88 182.785   2
   5   0  -4 5143.57 183.058   2
   0   5   4 5367.97 184.391   3
   5   0  -4 5043.25 184.308   3
  -5   0   4 5136.87 184.662   3
  -5   5  -4 5063.70 182.633   2
  -5   0   4 5141.18 185.596   1
   5  -6  -4 2799.54 107.081   2
   1   5  -4 2774.97 105.243   3
  -6   1  -4 2819.05 104.272   1
   1  -6   4 2842.20 106.764   1
  -6   1  -4 2909.46 104.281   2
   5  -6  -4 2995.67 104.004   1
   5   1   4 2983.49 104.051   3
  -6   5   4 2846.18 105.102   1
  -6   1  -4 2765.39 104.412   1
  -6   5   4 2794.90 106.002   3
   5   1   4 2755.09 103.868   2
  -5  -1  -4 2913.19 104.243   2
  -5   6   4 2827.73 103.881   1
   6  -5  -4 2861.49 104.798   1
   6  -1   4 2846.04 104.008   3
  -5  -1  -4 2788.36 103.287   1
  -1   6  -4 2610.34 104.822   3
   6  -5  -4 2871.50 103.765   2
  -1  -5   4 2774.08 106.546   1
  -5   6   4 2874.65 106.100   3
  -5   6   4 2870.69 103.829   2
  -1   6  -4 2707.00 104.070   2
  -5  -1  -4 2841.25 104.230   3
  -1  -5   4 2783.16 104.739   3
   4   2  -4 689.099 29.1416   2
   4  -6   4 670.704 30.6031   3
   4   2  -4 659.014 31.3497   3
  -6   4  -4 646.312 31.7990   1
   2  -6  -4 641.948 28.5681   2
   2   4   4 686.093 29.0053   2
   4   2  -4 660.267 32.9563   1
   2  -6  -4 616.115 29.9473   3
  -6   4  -4 627.112 30.2959   1
   2   4   4 729.863 30.5869   3
  -6   4  -4 643.839 29.1861   2
  -6   2   4 639.474 35.8366   3
  -6   2   4 632.141 32.1300   1
  -6   4  -4 650.323 30.3527   3
  -2   6   4 714.712 37.5411   2
  -2  -4  -4 710.772 34.4559   2
   6  -2  -4 586.171 30.2432   3
   6  -2  -4 592.912 28.8630   2
  -2   6   4 666.391 31.6926   3
   6  -4   4 695.481 30.3040   3
   6  -2  -4 591.900 32.1864   1
  -4   6  -4 586.052 30.6811   1
  -4  -2   4 671.498 30.4829   3
  -2  -4  -4 672.753 29.3843   3
  -4  -2   4 742.231 32.8598   1
   6  -4   4 616.458 27.7664   2
  -4   6  -4 637.268 28.0871   2
   7   0   4 470.845 22.5340   3
  -7   0  -4 460.025 23.9758   1
  -7   0  -4 469.690 24.0260   2
  -7   7   4 452.324 26.8962   3
   0  -7   4 439.394 27.1047   1
   7  -7  -4 420.479 23.4592   1
  -7   7   4 440.389 25.2503   1
   7  -7  -4 453.106 23.2086   2
  -7   0  -4 461.750 23.4512   3
   7   0   4 480.784 26.7974   2
   0   7  -4 450.762 21.6147   2
   0  -7   4 458.458 24.3526   3
   3  -7   4 1971.07 74.7686   3
   4   3   4 2015.77 73.0694   3
   3   4  -4 1911.33 74.5324   2
  -7   3  -4 1988.66 73.6038   2
  -7   3  -4 1929.33 74.0291   3
   3   4  -4 1879.74 74.9096   3
   4   3   4 1868.25 73.1043   2
   3  -7   4 1980.15 76.4300   1
  -7   3  -4 1939.61 74.5264   1
  -7   3  -4 1915.59 74.8761   1
  -7   4   4 2026.49 75.9889   3
  -7   4   4 1990.93 75.6681   1
   7  -4  -4 1975.92 75.3877   1
  -3   7  -4 2004.74 72.0715   2
  -4   7   4 2037.57 75.5038   3
   7  -3   4 1865.82 72.7099   2
  -4  -3  -4 1842.01 72.8408   3
  -3  -4   4 1867.10 73.7038   3
  -4   7   4 1853.40 74.4297   2
  -4  -3  -4 1899.94 73.2023   2
  -3  -4   4 1893.30 76.2654   1
   7  -3   4 2046.24 74.0547   3
   7  -4  -4 1977.16 73.1461   2
   1   6   4 66.9301 12.5711   3
   1  -7  -4 58.4604 10.8009   3
   1   6   4 88.8430 13.2098   2
  -7   6  -4 85.0507 11.4803   2
   6   1  -4 73.7763 12.6699   3
   6   1  -4 78.9168 11.0897   2
  -7   6  -4 88.7623 14.9318   1
   6  -7   4 97.6945 12.5593   3
  -7   1   4 68.2362 14.7225   1
  -7   1   4 51.0276 14.6293   3
  -1  -6  -4 65.7600 11.9744   3
  -6   7  -4 86.6822 15.1364   1
  -6   7  -4 95.3096 11.1120   2
  -1   7   4 66.6103 13.3625   3
  -6  -1   4 85.9530 14.3590   1
   7  -1  -4 60.7140 11.8922   3
   7  -6   4 88.2104 12.1316   3
  -6  -1   4 65.4511 12.9731   3
   7  -1  -4 72.6596 11.4041   2
  -1   7   4 85.2951 10.9287   2
   2   6  -4 230.678 19.4911   3
  -8   2  -4 176.888 16.3061   3
   2   6  -4 226.411 15.8307   2
  -8   2  -4 177.197 18.5468   1
  -8   6   4 254.554 20.8931   3
   6   2   4 229.131 15.2845   3
   2  -8   4 194.777 19.5724   1
   6  -8  -4 205.596 15.0471   1
   2  -8   4 179.149 17.5532   3
  -8   2  -4 189.250 17.2605   2
  -8   6   4 196.042 20.5484   1
   6   2   4 227.302 16.7785   2
   8  -2   4 193.079 15.9782   2
   8  -2   4 194.425 15.7208   3
   8  -6  -4 210.060 19.1609   1
  -6   8   4 232.670 20.3555   3
  -6  -2  -4 189.564 16.8978   2
  -2   8  -4 189.433 14.4397   2
   8  -6  -4 218.417 16.2319   2
  -2  -6   4 195.208 20.4298   1
  -6  -2  -4 206.132 16.4931   3
   3   5   4 630.982 28.4591   3
   5   3  -4 609.896 30.7721   3
  -8   3   4 586.730 31.7561   3
   5  -8   4 613.486 29.9458   3
  -8   5  -4 595.979 28.3006   2
   3  -8  -4 605.273 26.9219   2
   3   5   4 581.985 27.9911   2
  -8   3   4 585.167 32.3011   1
  -8   5  -4 621.313 31.6857   1
   5   3  -4 638.904 28.5332   2
   8  -3  -4 637.250 28.8846   2
  -3  -5  -4 577.306 26.9849   3
  -5  -3   4 593.566 32.3693   1
  -3  -5  -4 617.462 27.7517   2
  -5   8  -4 623.017 27.2164   2
  -3   8   4 599.909 30.8911   3
  -5  -3   4 587.915 28.9517   3
   8  -5   4 631.196 29.1476   3
  -3   8   4 593.500 27.5694   2
  -8   8  -4 46.8983 14.7726   1
   0   8   4 0.45274 11.8766   3
   8  -8   4 49.9109 11.6793   3
  -8   0   4 14.5257 12.8876   1
   0  -8  -4 10.4419 9.25068   3
  -8   8  -4 36.6682 9.82721   2
   0  -8  -4 10.0843 8.46424   2
  -8   0   4 -0.3742 11.8961   3
   0   8   4 13.0910 8.94147   2
   8   0  -4 15.2445 10.2336   2
   1  -9   4 144.173 19.2579   1
   8   1   4 148.767 13.6338   3
   1  -9   4 153.443 17.5970   3
  -9   1  -4 161.963 17.2541   2
   1   8  -4 181.750 14.4627   2
  -9   1  -4 167.443 18.5318   1
   8   1   4 184.200 22.3817   2
  -9   8   4 163.296 20.1110   3
  -9   1  -4 176.499 15.6304   3
   9  -1   4 155.034 15.8427   2
  -8  -1  -4 171.042 15.1027   3
  -1  -8   4 159.105 16.8401   3
   9  -8  -4 152.257 15.4452   2
  -8  -1  -4 175.753 17.0897   2
  -1   9  -4 153.419 13.7230   2
  -1  -8   4 156.967 20.3764   1
   9  -1   4 141.927 14.2766   3
  -8   9   4 148.403 19.8409   3
   9  -8  -4 154.851 17.2630   1
  -8   9   4 145.648 17.8172   1
  -8  -1  -4 184.469 17.1896   1
   4   5  -4 588.040 27.5999   2
   4  -9   4 636.733 29.8206   3
  -9   4  -4 642.666 31.4258   1
   4   5  -4 541.010 30.1227   3
   5   4   4 529.988 26.2788   3
  -9   5   4 582.309 32.2215   1
  -9   4  -4 639.325 28.5577   2
   5  -9  -4 602.286 26.8355   2
  -9   5   4 597.471 31.9299   3
   5   4   4 546.839 27.7652   2
  -5   9   4 590.514 27.0167   2
  -4   9  -4 658.193 26.2013   2
  -5   9   4 620.043 30.9527   3
   9  -5  -4 577.394 27.8780   2
  -5  -4  -4 519.633 26.0687   3
  -4  -5   4 551.805 32.1586   1
  -4  -5   4 510.969 27.9200   3
   9  -4   4 606.632 28.3479   3
  -9   2   4 112.672 17.1044   1
  -9   2   4 117.126 16.2545   3
   7   2  -4 107.819 13.1069   2
  -9   7  -4 113.624 16.6460   1
   2   7   4 116.610 13.7250   3
  -9   7  -4 129.241 13.1502   2
   7   2  -4 116.640 16.9757   3
   2   7   4 115.431 14.9559   2
   2  -9  -4 118.242 13.4699   2
   7  -9   4 110.609 14.2344   3
  -7   9  -4 107.985 14.0416   2
  -7  -2   4 106.620 16.7368   1
  -2  -7  -4 95.6005 10.8572   2
   9  -2  -4 139.887 14.6888   2
  -2  -7  -4 85.4495 13.1672   3
   9  -7   4 115.900 15.8257   3
  -7   9  -4 121.178 18.1413   1
  -2   9   4 114.120 14.1814   2
  -2   9   4 134.832 18.1714   3
 -10   0  -4 1281.68 53.8967   2
 -10   0  -4 1263.09 56.5189   1
  10   0   4 1396.56 56.8061   2
   0 -10   4 1366.79 58.1163   1
 -10  10   4 1328.04 55.9206   3
   0 -10   4 1355.24 54.4401   3
 -10  10   4 1323.31 55.0761   1
   0  10  -4 1344.02 51.0933   2
 -10   7   4 142.286 20.8491   1
 -10   3  -4 164.296 19.6421   1
 -10   3  -4 159.020 15.4853   3
   3 -10   4 129.378 17.3851   3
   7 -10  -4 184.424 15.6798   2
   3   7  -4 180.869 15.9935   2
 -10   3  -4 135.626 17.2261   2
   7 -10  -4 166.012 14.2508   1
 -10   7   4 159.137 20.3688   3
   7   3   4 137.872 16.3703   2
  -7  10   4 156.050 15.1199   2
  -7  -3  -4 158.783 16.5089   2
  -3  10  -4 159.831 13.4755   2
  -3  -7   4 140.953 20.5578   1
  10  -7  -4 183.471 15.9251   2
  -7  10   4 147.784 15.8298   1
  -3  -7   4 149.056 15.8293   3
  -7  10   4 171.325 19.9462   3
  10  -3   4 147.573 15.3269   3
   4   6   4 98.0495 13.5913   3
 -10   6  -4 114.343 13.0758   2
   4 -10  -4 109.953 18.1925   2
 -10   4   4 111.320 17.0848   1
   6 -10   4 127.373 16.9509   3
   4   6   4 108.377 14.7566   2
   6   4  -4 86.9139 13.9805   3
 -10   4   4 119.883 16.5250   3
 -10   6  -4 105.437 16.1434   1
  -4  10   4 128.466 16.0132   3
  -6  -4   4 101.770 16.5980   1
  -6  -4   4 112.488 14.9912   3
  -4  10   4 117.593 14.0160   2
  10  -6   4 113.225 15.1123   3
  10  -4  -4 82.8371 12.7044   2
  -4  -6  -4 91.1049 10.7470   3
  -6  10  -4 103.245 13.5592   2
   1 -10  -4 335.947 17.8667   2
 -10   9  -4 315.871 19.7340   2
   1   9   4 324.379 22.2150   3
   1   9   4 288.004 19.3157   2
 -10   1   4 304.930 26.0300   1
 -10   1   4 286.904 23.2415   3
   9 -10   4 320.721 21.7652   3
 -10   9  -4 304.248 25.7004   1
  10  -9   4 321.770 21.6222   3
  10  -1  -4 340.650 22.4218   2
  -9  10  -4 315.838 19.5057   2
  -1  -9  -4 325.620 19.0526   3
  -1  -9  -4 324.937 19.4519   2
  -9  -1   4 300.231 22.0724   3
  -1  10   4 308.510 22.6608   3
  -9  -1   4 304.644 25.7896   1
  -9  10  -4 312.872 26.4243   1
  10  -1  -4 329.399 21.8422   2
  -1  10   4 293.155 18.8485   2
   2 -11   4 63.5179 13.0697   3
   2   9  -4 83.3771 11.1652   2
 -11   9   4 88.4044 15.2172   3
 -11   2  -4 90.1078 13.1937   3
 -11   2  -4 75.7443 14.7291   1
 -11   9   4 90.3503 15.0901   1
   9 -11  -4 109.790 11.6518   2
   9 -11  -4 89.4270 11.8012   1
   9   2   4 90.1648 17.2506   2
 -11   2  -4 77.4286 12.8562   2
   2 -11   4 59.4023 15.0434   1
  -2  -9   4 72.6796 12.4510   3
  11  -9  -4 87.6187 11.6125   2
  -9  -2  -4 75.0712 12.7383   2
  -9  11   4 102.360 13.3685   1
  11  -2   4 70.5540 11.9122   3
  -2  -9   4 67.9881 15.4903   1
  -9  11   4 103.112 15.5724   3
 -11   6   4 137.622 20.7073   3
   6   5   4 124.682 16.6195   2
   6 -11  -4 118.783 14.0206   2
   5   6  -4 127.166 15.8324   3
   5 -11   4 176.343 18.0706   3
 -11   6   4 135.757 22.0764   1
 -11   5  -4 159.419 16.7043   2
 -11   5  -4 155.248 21.1016   1
  11  -6  -4 160.584 16.7380   2
  -6  11   4 131.545 14.8263   2
  11  -5   4 173.649 16.0833   3
  -5  -6   4 150.701 17.9190   3
  -6  -5  -4 137.303 15.2963   2
  -5  11  -4 166.912 13.9200   2
  -5  -6   4 143.743 21.5058   1
  -6  11   4 154.680 19.7566   3
 -11   3   4 184.192 21.8213   3
 -11   3   4 158.435 23.0649   1
 -11   8  -4 174.887 22.0201   1
   8 -11   4 197.049 18.7814   3
   3   8   4 181.484 16.6848   2
   3 -11  -4 189.245 14.2625   2
 -11   8  -4 189.121 16.9075   2
   8   3  -4 146.298 19.9622   3
  11  -3  -4 152.001 17.6321   2
  -8  -3   4 193.904 17.0525   3
  11  -3  -4 160.740 18.6639   2
  11  -8   4 195.932 17.8175   3
  -3  11   4 171.617 15.7534   2
  -3  -8  -4 198.342 15.1964   2
  -3  11   4 176.709 19.9432   3
  -8  -3   4 172.783 22.8577   1
  -8  11  -4 187.548 23.0372   1
  -8  11  -4 184.579 15.2755   2
  11 -11   4 2328.39 89.6576   3
 -11   0   4 2309.01 92.6978   1
 -11  11  -4 2275.75 91.9670   1
  11   0  -4 2259.88 87.9211   2
   0 -11  -4 2344.54 84.4397   2
   0  11   4 2277.28 86.3860   2
 -11   0   4 2286.50 88.0573   3
 -11  11  -4 2318.93 86.4162   2
   0  11   4 2270.01 87.5385   3
 -12   1  -4 251.025 20.4020   2
 -12   1  -4 276.751 23.5904   1
  11 -12  -4 244.680 18.1782   2
   1  11  -4 249.866 17.2761   2
   1 -12   4 295.534 21.3153   3
 -12  11   4 268.727 23.0469   3
   1 -12   4 288.678 24.5543   1
 -12  11   4 240.114 23.0200   1
 -11  -1  -4 247.618 20.2626   2
 -11  12   4 242.044 22.3141   1
  -1 -11   4 254.642 20.3208   3
  12 -11  -4 239.886 21.5083   2
 -11  12   4 260.085 23.2412   3
 -11  -1  -4 203.672 20.6649   1
  -1 -11   4 265.308 25.2622   1
 -12   4  -4 63.7497 15.1840   1
   4 -12   4 70.4492 13.5369   3
 -12   8   4 61.2125 15.5047   1
 -12   8   4 63.6417 14.8918   3
   8 -12  -4 84.6336 10.7498   2
 -12   4  -4 72.1153 12.6787   2
   8   4   4 67.5481 11.9994   2
  12  -8  -4 79.5233 12.4159   2
  -4  -8   4 75.4186 11.8896   3
  -8  -4  -4 98.0925 21.1216   2
  -8  12   4 80.1360 14.7002   3
  12  -4   4 87.4759 12.0273   3
  -4  -8   4 64.5413 16.0431   1
  -8  12   4 66.4089 11.1376   2
 -12   7  -4 20.6555 14.0772   1
 -12   5   4 14.3964 14.2054   1
   5 -12  -4 28.2466 7.87656   2
 -12   7  -4 20.5717 10.3822   2
   5   7   4 34.7196 10.6035   2
 -12   5   4 15.2524 14.0505   3
   7   5  -4 8.57736 12.5197   3
   7 -12   4 22.7091 11.6762   3
  -5  12   4 24.2015 9.07929   2
  -7  12  -4 23.2974 8.73615   2
  -5  -7  -4 20.0336 9.19123   2
  -7  12  -4 20.0201 14.4140   1
  12  -5  -4 37.8203 11.5398   2
  -7  -5   4 26.8603 11.4863   3
  -7  -5   4 19.1463 13.9609   1
  12  -7   4 18.7591 10.5596   3
  -5  12   4 26.2385 13.5415   3
  10   2  -4 100.957 14.4739   2
 -12  10  -4 131.819 19.6025   1
  10 -12   4 120.850 16.3462   3
 -12  10  -4 122.835 13.8167   2
 -12   2   4 107.029 16.0848   3
 -12   2   4 107.918 18.8420   1
   2  10   4 114.247 15.5604   2
  12 -10   4 107.679 14.8045   3
  -2  12   4 108.120 14.6737   2
 -10  12  -4 131.015 19.2652   1
  -2 -10  -4 112.145 11.7781   2
  -2  12   4 133.985 16.6115   3
 -10  12  -4 114.535 14.5938   2
  12  -2  -4 115.051 14.7209   2
 -10  -2   4 109.549 15.9190   3
 -10  -2   4 104.494 17.9536   1
   0 -13   4 2.73306 10.8079   3
 -13  13   4 -1.8003 13.0605   3
  13 -13  -4 6.35414 11.1250   2
 -13  13   4 12.2133 13.7702   1
 -13   0  -4 -3.8548 10.4473   2
 -13   0  -4 -11.211 12.0316   1
 -13   3  -4 28.8840 13.1986   2
   3 -13   4 14.3541 11.8808   3
 -13  10   4 19.7401 13.8921   1
 -13  10   4 10.9585 13.3931   3
  10   3   4 16.3588 10.2730   2
   3  10  -4 14.5828 9.96664   2
 -13   3  -4 18.2402 14.3151   1
  10 -13  -4 36.1816 9.70176   2
 -10  13   4 -1.1135 12.8352   3
 -10  13   4 6.78569 11.7830   1
 -10  -3  -4 -1.0580 9.67208   2
  -3 -10   4 12.6817 13.9250   1
  -3 -10   4 19.8970 10.2715   3
  13 -10  -4 20.2785 9.91366   2
 -13   7   4 363.873 28.5401   1
   7   6   4 365.931 23.3003   2
 -13   6  -4 374.583 28.3613   1
   7 -13  -4 385.969 19.4267   2
 -13   6  -4 379.789 23.3640   2
 -13   7   4 337.397 26.9833   3
   6 -13   4 401.530 25.2457   3
  -6  -7   4 391.628 21.5695   3
  -7  13   4 376.340 21.4128   2
  -6  -7   4 394.656 29.1125   1
  13  -7  -4 351.788 23.1420   2
  -7  13   4 314.914 25.2011   3
  13  -6   4 415.704 22.9833   3
 -13   4   4 294.466 27.7418   1
   4   9   4 260.961 20.1073   2
 -13   4   4 254.292 25.5638   3
 -13   9  -4 290.449 26.9149   1
   9 -13   4 328.165 23.4990   3
 -13   9  -4 310.030 20.8587   2
  -9  -4   4 321.528 27.8955   1
  -9  -4   4 315.038 19.3968   3
  13  -9   4 314.625 21.3901   3
  -9  13  -4 336.565 28.1934   1
  -9  13  -4 311.875 18.7052   2
  -4  13   4 273.740 23.7998   3
  -4  -9  -4 290.632 18.9648   2
  -4  13   4 290.974 19.2095   2
  13  -4  -4 297.371 22.5752   2
  12   1  -4 63.7738 13.3631   2
 -13  12  -4 47.7439 28.1781   1
 -13   1   4 52.6820 18.1782   1
   1  12   4 43.5844 10.9176   2
 -13  12  -4 60.6307 11.6215   2
  -1  13   4 48.4002 14.3244   3
  13  -1  -4 46.1713 12.8904   2
 -12  13  -4 48.3941 19.9460   1
 -12  -1   4 45.3064 12.0702   3
 -12  13  -4 41.6601 10.7935   2
 -12  -1   4 59.6757 19.3341   1
  -1  13   4 82.4901 11.7908   2
 -14  12   4 151.007 23.0368   1
 -14   2  -4 136.869 21.9033   1
 -14  12   4 179.436 22.2706   3
 -14   2  -4 140.777 18.8057   2
   2  12  -4 164.303 16.1545   2
   2 -14   4 124.605 16.4474   3
  12 -14  -4 186.114 16.0280   2
  14 -12  -4 167.340 15.4781   2
 -12  -2  -4 151.253 18.1879   2
 -12  14   4 187.613 20.9813   1
  -2 -12   4 177.001 17.6430   3
 -12  -2  -4 178.512 19.5543   1
 -12  14   4 176.537 21.9888   3
   5 -14   4 143.148 19.8830   3
 -14   5  -4 164.276 18.6700   2
 -14   5  -4 150.819 23.4232   1
   9   5   4 164.228 18.2753   2
 -14   9   4 158.993 22.5758   3
 -14   9   4 165.346 23.1280   1
  -9  -5  -4 147.858 16.7477   2
  -9  14   4 181.739 21.2680   3
  -5  -9   4 181.562 23.7722   1
  -5  -9   4 160.556 17.6131   3
 -14   6   4 440.902 32.5389   1
 -14   8  -4 475.513 26.6311   2
 -14   6   4 489.780 30.8626   3
   8   6  -4 435.997 26.1836   2
   6   8   4 422.664 26.0489   2
   8 -14   4 472.799 28.5558   3
 -14   8  -4 501.794 31.9032   1
  -8  14  -4 478.397 32.6641   1
  14  -6  -4 476.438 27.1579   2
  -8  -6   4 418.008 32.3860   1
  -6  14   4 464.854 24.0586   2
  -6  14   4 459.196 28.6103   3
  -6  -8  -4 492.310 36.3459   2
 -14  11  -4 40.2267 12.0331   2
 -14  11  -4 38.3731 16.8625   1
  11   3  -4 38.9616 12.9964   2
   3  11   4 39.5690 11.5566   2
 -14   3   4 50.1704 14.5980   3
 -14   3   4 30.5992 16.0322   1
  -3  14   4 35.0236 14.5036   3
 -11  -3   4 64.2746 10.8369   3
 -11  14  -4 42.2928 16.8616   1
 -11  -3   4 35.6220 16.1408   1
  -3  14   4 25.0527 13.4657   2
 -14   0   4 177.381 19.6642   3
   0  14   4 146.109 18.4132   2
 -14  14  -4 204.243 18.8778   2
 -14   0   4 164.248 27.0746   1
 -14  14  -4 206.592 26.6993   1
 -15   1  -4 114.627 16.1172   2
 -15  14   4 137.429 19.6210   1
 -15  14   4 103.823 18.2447   3
 -15   1  -4 100.531 17.7966   1
   1 -15   4 122.950 16.0969   3
 -14  -1  -4 112.947 16.8370   1
 -14  15   4 132.982 21.9053   1
 -14  15   4 126.966 18.9133   3
  15 -14  -4 99.5596 20.3138   2
  -1 -14   4 113.430 19.0724   1
 -14  -1  -4 113.976 15.7624   2
  -1 -14   4 122.857 18.0161   3
 -15  11   4 401.703 30.0899   1
  11   4   4 373.836 25.1315   2
 -15  11   4 408.416 28.7259   3
   4 -15   4 414.542 26.8182   3
 -15   4  -4 430.071 26.0042   2
 -15   4  -4 401.444 30.1603   1
 -11  15   4 394.713 28.4869   3
  -4 -11   4 369.352 30.1406   1
  15 -11  -4 426.892 23.9952   2
  -4 -11   4 371.599 23.1372   3
 -11  15   4 418.040 25.7776   1
 -15   7  -4 170.585 24.6664   1
 -15   8   4 176.248 23.8864   3
 -15   7  -4 217.247 19.5043   2
   7   8  -4 212.675 19.2745   2
   8   7   4 201.813 19.8281   2
  -8  15   4 156.725 16.5440   2
  -7  15  -4 177.050 25.6526   1
  -8  15   4 173.980 22.0719   3
  -8  -7  -4 202.698 16.9840   2
  -7  -8   4 199.598 27.9995   1
  15  -8  -4 160.257 19.2841   2
  10   5  -4 465.226 36.5971   2
 -15  10  -4 546.437 35.0271   1
 -15  10  -4 502.256 28.1892   2
 -15   5   4 498.025 35.6313   1
   5  10   4 557.243 28.6133   2
 -15   5   4 517.956 32.9829   3
  -5  15   4 539.913 31.9740   3
  -5 -10  -4 503.324 25.5459   2
 -10  -5   4 502.951 35.7704   1
 -10  15  -4 551.720 25.4437   2
 -10  15  -4 556.795 36.2502   1
 -15  13  -4 305.085 21.5307   2
  13   2  -4 291.959 23.4573   2
   2  13   4 271.043 21.0165   2
 -15   2   4 313.581 29.9741   1
 -15   2   4 313.488 24.6748   3
 -15  13  -4 308.119 30.1139   1
 -13  15  -4 298.243 20.5635   2
 -13  15  -4 273.536 29.0383   1
  -2  15   4 306.527 25.6317   3
 -13  -2   4 280.672 28.8261   1
  -2  15   4 300.078 20.7246   2
 -16   0  -4 303.204 24.4359   2
 -16   0  -4 259.154 27.1878   1
 -16  16   4 268.896 27.8793   3
 -16  16   4 305.424 28.5762   1
 -16  13   4 98.2470 18.5195   3
 -16   3  -4 96.4707 15.2661   2
 -16   3  -4 83.4139 19.9775   1
   3  13  -4 103.819 13.8280   2
 -16  13   4 105.026 19.3992   1
   3  13  -4 101.422 13.0178   2
  16 -13  -4 85.1219 14.4637   2
  -3 -13   4 105.769 20.1279   1
 -13  16   4 104.029 16.7508   1
 -13  -3  -4 90.4043 14.1569   1
  -3 -13   4 113.298 13.9716   3
 -13  16   4 106.540 18.7336   3
 -13  -3  -4 95.4261 14.5272   2
 -16  10   4 881.200 44.6754   3
 -16  10   4 859.227 45.5492   1
 -16   6  -4 900.387 41.2285   2
  10   6   4 885.969 40.7961   2
   6  10  -4 886.001 39.6496   2
 -16   6  -4 861.552 49.0458   1
 -10  16   4 819.923 43.1681   3
  -6 -10   4 897.760 46.6320   1
 -10  -6  -4 946.045 39.9169   2
  16 -10  -4 885.843 39.9588   2
 -16   9  -4 256.320 28.1338   1
 -16   7   4 290.272 29.9763   1
   9   7  -4 283.905 22.5331   2
 -16   7   4 292.607 27.1984   3
 -16   9  -4 280.465 21.9998   2
   7   9   4 296.074 22.5848   2
  -9  -7   4 290.796 29.1466   1
  -9  16  -4 272.674 29.7487   1
  16  -7  -4 307.827 23.6485   2
  -7  16   4 274.774 20.7845   2
  -7  -9  -4 321.544 20.2168   2
   4  12   4 581.452 31.1664   2
 -16   4   4 604.875 39.2802   1
 -16   4   4 628.236 35.0433   3
 -16  12  -4 621.922 31.5435   2
 -16  12  -4 599.163 38.6633   1
  -4  16   4 581.005 29.7730   2
 -12  16  -4 616.312 29.3531   2
 -12  16  -4 622.997 39.6756   1
 -12  -4   4 604.384 39.5734   1
  -4  16   4 613.410 35.1336   3
  16  -4  -4 664.678 34.7817   2
 -16   1   4 204.139 21.5115   3
 -16  15  -4 147.769 18.4490   2
 -16   1   4 175.628 28.4109   1
 -16  15  -4 177.007 29.3167   1
   1  15   4 185.848 22.1318   2
  -1  16   4 162.806 19.0291   2
 -15  16  -4 169.829 28.4668   1
 -15  -1   4 207.509 28.8380   1
 -15  16  -4 182.214 18.2828   2
 -17   2  -4 159.524 21.5773   1
 -17  15   4 123.227 20.6462   3
 -17   2  -4 126.404 17.4174   2
 -17  15   4 155.827 26.0934   1
 -15  17   4 98.3581 19.4434   3
 -15  -2  -4 159.224 21.0834   1
  -2 -15   4 121.140 20.5139   1
   5  12  -4 166.248 19.4030   2
 -17  12   4 153.321 25.7421   1
 -17   5  -4 163.790 20.8870   2
 -17   5  -4 185.368 17.3408   3
 -17   5  -4 153.101 21.7783   1
 -17  12   4 137.327 20.2814   3
 -12  17   4 128.696 19.9783   3
  -5 -12   4 174.477 25.4103   1
 -12  17   4 183.152 21.2116   1
  17 -12  -4 169.579 21.9376   2
 -17   8  -4 113.898 15.9725   2
 -17   9   4 117.125 20.2446   1
 -17   9   4 82.6607 18.6617   3
 -17   8  -4 104.522 20.4218   1
   8   9  -4 108.350 14.9758   2
  -9  17   4 107.041 18.5423   3
  17  -9  -4 104.082 15.4805   2
  -8  17  -4 107.590 21.4713   1
  -8  -9   4 104.524 19.9010   1
 -17  11  -4 441.189 27.1004   2
 -17  11  -4 450.201 34.8452   1
 -17   6   4 453.631 36.0261   1
  -6  17   4 473.826 25.1718   2
  -6  17   4 451.895 31.8771   3
  17  -6  -4 434.528 29.8642   2
 -11  -6   4 457.625 35.0165   1
 -11  17  -4 429.683 35.3014   1
 -17  14  -4 19.1409 18.4260   1
 -17   3   4 43.8311 18.7997   1
 -17   3   4 29.0212 14.1171   3
 -17  14  -4 6.23444 11.4684   2
 -14  -3   4 14.4652 17.5207   1
 -14  17  -4 30.5968 11.2279   2
 -14  17  -4 17.4014 18.1741   1
  -3  17   4 24.6164 16.1314   3
  -3  17   4 18.5422 11.7554   2
 -17  17  -4 18.3749 11.6589   2
 -18  17   4 101.282 20.9420   3
 -18   1  -4 127.078 20.4364   1
 -18  17   4 164.449 27.3440   1
 -17  18   4 171.129 26.0382   1
 -17  18   4 98.9252 20.7521   3
 -17  -1  -4 158.373 23.3538   1
 -18   4  -4 78.7337 20.2387   1
 -18  14   4 68.0249 18.8168   3
   4  14  -4 67.6989 13.3140   2
 -18  14   4 103.694 20.5454   1
 -18   4  -4 80.6713 15.6604   2
  -4 -14   4 73.0718 19.6855   1
 -14  18   4 80.4802 19.4245   3
 -14  18   4 99.8779 17.9607   1
 -18   7  -4 51.2157 13.8667   2
 -18  11   4 51.7954 18.5657   3
 -18  11   4 58.8287 19.0774   1
 -18   7  -4 43.7338 19.2238   1
 -18   7  -4 47.3125 12.1854   3
   7  11  -4 37.8807 14.7332   2
 -11  18   4 22.2573 16.5890   3
  -7 -11   4 49.7348 17.6880   1
  18 -11  -4 46.6185 17.8560   2
  -7  18  -4 62.5767 20.6199   1
 -18  10  -4 52.2050 19.9256   1
 -18  10  -4 59.7473 13.7679   2
 -18   8   4 64.0295 20.2343   1
 -18   8   4 47.0626 17.9427   3
  18  -8  -4 50.8498 15.3338   2
  -8  18   4 47.4456 17.8333   3
  -8  18   4 43.7487 12.0313   2
 -10  18  -4 44.7811 20.0009   1
 -10  -8   4 70.3482 19.3944   1
 -18   5   4 152.379 23.8798   1
 -18   5   4 132.622 21.0909   3
 -18  13  -4 144.907 24.2136   1
 -18  13  -4 116.903 16.2747   2
  -5  18   4 156.244 18.7898   2
  -5  18   4 161.533 21.5305   3
 -13  18  -4 147.245 16.9802   2
  18  -5  -4 206.642 24.7554   2
 -13  -5   4 190.888 29.8230   1
 -13  18  -4 106.722 22.8131   1
 -18   2   4 169.578 29.3599   1
 -18  16  -4 231.961 24.9375   3
 -18  16  -4 167.770 20.0717   2
 -18  16  -4 153.470 30.2914   1
 -16  18  -4 131.072 34.1205   1
  -2  18   4 186.051 24.4327   3
 -16  18  -4 191.417 19.9406   2
 -19  16   4 21.5182 17.3758   1
 -19  16   4 -1.0169 16.9176   3
 -19   3  -4 -0.4604 16.4711   1
 -19   3  -4 11.1407 14.9104   2
 -16  19   4 19.6224 15.8240   1
  -3 -16   4 9.18432 15.4535   1
 -16  19   4 -6.5498 16.6193   3
 -19  13   4 -4.1182 16.5585   3
 -19   6  -4 -25.927 16.3599   1
 -19  13   4 4.89523 17.0181   1
 -19   6  -4 3.16630 12.4409   2
 -19   6  -4 3.66010 11.1154   3
  -6 -13   4 11.1345 15.7831   1
 -13  19   4 8.59420 16.3292   3
  -6  19  -4 35.2378 20.0862   1
 -19   9  -4 46.9862 13.0065   3
 -19   9  -4 -2.6657 18.0115   1
 -19  10   4 4.24698 17.1622   3
 -19   9  -4 32.1959 13.7130   2
 -19  10   4 19.0552 17.3403   1
  -9 -10   4 43.7071 16.8867   1
  -9  19  -4 11.7698 19.8090   1
 -10  19   4 -0.3983 16.8815   3
 -19  12  -4 140.834 20.3620   3
 -19  12  -4 89.1585 22.0885   1
 -19   7   4 58.7708 19.2597   3
 -19   7   4 88.7535 21.9499   1
 -19  12  -4 72.9378 15.4451   2
  -7  19   4 65.1935 20.0051   3
 -12  19  -4 75.5703 22.6790   1
  19  -7  -4 67.6488 17.2091   2
 -12  -7   4 103.673 21.2425   1
 -19  15  -4 19.5896 20.9178   1
 -19   4   4 31.3515 19.1333   1
 -19  15  -4 25.9676 12.5237   2
 -19  15  -4 30.8767 14.6717   3
 -19   4   4 45.9626 14.8838   3
  -4  19   4 3.04350 17.1832   3
 -15  -4   4 17.0981 20.6907   1
 -15  19  -4 5.73375 20.1025   1
 -15  19  -4 13.8233 18.3487   2
 -20   8  -4 -3.1089 18.1515   1
 -20   8  -4 22.7101 12.4169   3
 -20  12   4 9.29326 18.1522   3
 -20   8  -4 -0.9154 12.6726   2
 -12  20   4 1.16220 20.7944   3
  -8  20  -4 20.0241 20.7075   1
  -8 -12   4 35.4591 16.9646   1
 -20  11  -4 146.074 20.5512   3
 -20   9   4 108.898 22.2218   3
 -20   9   4 138.653 24.3583   1
 -20  11  -4 126.777 17.0500   2
 -11  -9   4 142.534 23.1555   1
  -9  20   4 117.508 21.5250   3
 -11  20  -4 141.983 38.7301   1
 -20  14  -4 136.180 20.3289   3
 -20   6   4 105.005 22.5553   1
 -20  14  -4 122.612 16.8487   2
 -20  14  -4 116.921 25.0096   1
 -20   6   4 115.484 19.6797   3
  -6  20   4 102.119 21.3297   3
 -14  20  -4 133.431 16.1872   2
 -14  20  -4 107.651 24.6977   1
 -14  -6   4 134.314 22.5352   1
  20  -6  -4 136.788 20.5166   2
  -1   0   5 1546.38 62.0320   2
   0   1   5 1660.47 64.4752   3
   0  -1  -5 1625.66 62.9027   1
   1   0  -5 1623.58 62.5180   2
   0  -1  -5 1682.02 62.9449   2
   1  -1   5 1524.35 61.7247   2
   1  -1   5 1664.71 64.2918   3
  -1   0   5 1616.53 64.4647   3
  -1   1  -5 1668.10 62.6569   2
   1  -1   5 1681.18 63.6481   1
   0   1   5 1628.64 62.7520   1
  -1   0   5 1622.39 63.6094   1
   0   2  -5 107.623 12.0019   2
   2  -2  -5 101.880 11.7041   2
  -2   2   5 96.4970 12.0737   1
   2   0   5 107.582 15.9474   3
   0  -2   5 103.511 16.0584   1
  -2   0  -5 123.148 15.3249   2
   2  -2  -5 97.5484 12.7643   1
   0  -2   5 113.364 16.3416   3
   2   0   5 111.665 14.0707   2
  -2   2   5 93.2326 14.9137   3
   0   2  -5 125.123 16.1769   1
  -2   2   5 90.6944 11.5800   2
  -2   0  -5 110.064 13.5622   1
   2   1  -5 42.6235 9.91639   2
   1  -3  -5 52.4099 10.6672   2
  -3   1   5 55.6430 10.0308   2
  -3   1   5 55.9552 11.7084   1
   1   2   5 67.2097 10.7016   2
  -3   1   5 55.6047 13.3792   3
   1   2   5 53.1416 12.5927   3
   2   1  -5 50.7022 12.4863   1
  -3   2  -5 40.3038 10.4431   1
  -3   2  -5 48.0851 10.3938   2
   2  -3   5 47.3568 11.8359   3
   2  -3   5 61.1381 12.1060   1
  -2   3  -5 52.5215 11.3467   1
  -2  -1   5 39.7099 12.0320   3
  -2  -1   5 52.0676 13.5202   1
   3  -1  -5 58.4429 10.4324   2
  -1   3   5 59.7605 13.6678   3
  -1  -2  -5 66.4383 11.1278   2
   3  -2   5 51.8847 12.0586   3
  -2   3  -5 54.1385 10.5863   2
  -1   3   5 61.2822 9.66347   1
  -1  -2  -5 62.4575 9.62642   1
   3  -1  -5 51.6111 12.2589   1
  -1   3   5 59.4633 9.98931   2
   3   1   5 73.1362 12.5710   3
   1  -4   5 74.2571 13.4452   3
  -4   3   5 70.1104 11.5474   1
   3  -4  -5 72.0545 11.4315   1
   3   1   5 64.4738 18.4363   2
   1  -4   5 74.5579 13.2543   1
  -4   1  -5 79.6079 12.9786   1
   3  -4  -5 61.1683 10.8753   2
  -4   1  -5 65.6369 11.4723   2
  -4   3   5 79.7080 12.2564   2
  -4   3   5 72.6885 14.7256   3
  -3   4   5 81.2653 10.9581   1
  -3   4   5 71.4972 14.5148   3
  -1   4  -5 58.2688 10.6330   2
   4  -3  -5 82.4734 11.4832   2
  -3  -1  -5 60.9095 10.7642   1
  -3   4   5 76.9491 10.7825   2
  -3  -1  -5 67.4843 11.1412   2
  -1  -3   5 43.7331 12.6558   1
  -3  -1  -5 55.0644 13.4797   3
  -3  -1  -5 53.2754 9.49644   1
  -1  -3   5 55.8159 12.3279   3
   4  -1   5 67.5711 12.0507   3
   4  -1   5 72.4100 10.4366   2
   0  -4  -5 987.431 40.4085   2
   4  -4   5 954.294 41.5954   3
  -4   0   5 954.996 43.0579   3
  -4   4  -5 1035.43 49.6426   1
  -4   0   5 908.004 42.4384   1
   4   0  -5 971.316 40.2092   2
   0   4   5 938.191 40.0748   2
   0   4   5 950.415 42.5813   3
   0   5  -5 5263.00 190.216   2
   5   0   5 5180.66 190.847   2
   5   0   5 5658.26 192.001   3
  -5   0  -5 5335.62 191.139   1
   0  -5   5 5328.85 192.453   3
   5  -5  -5 5296.05 191.286   1
   5  -5  -5 5234.54 190.684   2
   0  -5   5 5222.99 193.752   1
  -5   5   5 5240.63 190.839   2
  -5   0  -5 5266.67 191.110   2
  -5   5   5 5357.67 191.382   1
  -5   0  -5 5084.39 190.544   1
  -5   5   5 5331.09 193.542   3
   3  -5   5 449.379 25.9279   3
  -5   3  -5 456.894 25.1518   2
   3   2  -5 481.302 34.5809   2
   2   3   5 521.793 26.4283   3
  -5   3  -5 465.449 25.3032   1
   2  -5  -5 515.037 25.1612   2
  -5   2   5 470.060 28.3989   3
  -5   3  -5 455.340 26.8951   1
   2   3   5 501.416 24.3784   2
   5  -2  -5 468.287 24.9547   2
  -2  -3  -5 483.910 25.8401   3
  -2   5   5 486.110 28.1559   3
  -2  -3  -5 483.147 25.0196   2
   5  -2  -5 488.933 27.4162   1
  -3  -2   5 479.302 26.8237   3
  -3   5  -5 479.037 24.4888   2
  -2   5   5 472.326 24.2892   2
   5  -3   5 474.219 25.6923   3
  -3  -2   5 461.982 27.3995   1
  -6   4   5 11.3621 10.8452   1
   2  -6   5 12.2031 11.5073   1
   4  -6  -5 14.2504 9.88576   2
   4   2   5 6.99771 9.01038   2
   2   4  -5 13.8042 9.42015   2
  -6   4   5 16.1027 14.0516   3
  -6   2  -5 20.9685 11.7051   1
  -6   2  -5 19.4569 10.5698   2
   2  -6   5 17.3711 10.4325   3
  -6   2  -5 9.84282 8.64026   1
  -4  -2  -5 19.7842 11.1633   3
  -4   6   5 8.55177 9.01359   2
  -2  -4   5 14.5444 10.8152   3
  -2  -4   5 10.0071 11.5748   1
   6  -4  -5 1.32600 9.98954   2
   6  -4  -5 26.8081 11.9880   1
  -4  -2  -5 4.62115 9.82326   2
  -4   6   5 22.6266 13.9028   3
  -2   6  -5 12.0785 9.23881   2
   6  -2   5 19.5750 10.0178   3
  -6   1   5 91.4480 15.1015   1
  -6   5  -5 83.6323 14.9708   1
  -6   1   5 71.3999 14.9906   3
  -6   5  -5 100.828 12.7217   2
   5  -6   5 115.487 16.2069   3
   5   1  -5 85.0044 14.5767   2
   1   5   5 72.7086 11.2652   2
   1   5   5 90.7243 14.4429   3
  -1   6   5 80.2568 14.8879   3
  -1  -5  -5 79.3445 19.4680   2
  -5  -1   5 86.4627 14.3389   3
   6  -1  -5 87.9561 12.6209   2
  -5  -1   5 81.4740 14.6846   1
   6  -5   5 90.0187 13.6136   3
  -1   6   5 75.3520 12.1252   2
  -5   6  -5 106.319 12.5398   2
  -7   6   5 352.214 23.4278   1
  -7   1  -5 384.884 20.8145   1
   6   1   5 316.882 20.9114   2
   6   1   5 319.375 21.1451   3
   6  -7  -5 341.998 20.3937   1
   1  -7   5 387.043 25.7999   1
   1   6  -5 326.223 20.5590   2
  -7   1  -5 384.404 23.0061   1
  -7   6   5 371.963 26.9411   3
   6  -7  -5 355.148 27.3051   2
   1  -7   5 351.586 22.4832   3
  -7   1  -5 363.834 22.8684   2
  -1  -6   5 328.448 22.7118   3
   7  -6  -5 355.830 21.6282   2
   7  -6  -5 361.652 22.5889   1
  -6  -1  -5 298.648 21.8302   2
  -6  -1  -5 320.315 20.7167   1
  -6   7   5 371.568 21.2959   2
  -6  -1  -5 322.592 22.4078   3
  -1   7  -5 372.450 20.8782   2
  -1  -6   5 327.623 25.5292   1
  -6   7   5 368.058 26.5280   3
  -6  -1  -5 322.244 18.7437   1
   7  -1   5 391.318 21.2913   3
  -6   7   5 354.545 21.4554   1
  -7   3   5 482.711 29.8343   3
   3  -7  -5 513.159 25.1094   2
   4  -7   5 473.227 27.0950   3
  -7   3   5 493.330 28.5025   1
  -7   4  -5 486.012 28.7097   1
  -7   4  -5 483.991 25.9585   2
   3   4   5 517.795 25.5417   2
   4   3  -5 476.938 25.3649   2
  -4  -3   5 478.265 29.3167   1
  -4  -3   5 498.642 27.1816   3
  -3  -4  -5 491.902 25.5487   2
   7  -3  -5 496.758 25.7269   2
  -3   7   5 500.989 25.1217   2
   7  -4   5 454.750 26.1207   3
  -3   7   5 501.904 29.5811   3
  -3  -4  -5 497.569 25.8641   3
  -4   7  -5 470.333 24.7060   2
   0   7   5 -0.3254 9.54413   2
  -7   7  -5 13.5130 13.4470   1
   7  -7   5 5.86425 10.3835   3
   0   7   5 -6.4256 12.5568   3
  -7   7  -5 14.9225 10.1342   2
  -7   0   5 -5.4904 13.0357   1
   0  -7  -5 7.37710 9.12500   2
   7   0  -5 12.7533 10.6096   2
  -7   0   5 -6.9036 12.4815   3
  -8   0  -5 379.547 20.5233   1
  -8   0  -5 346.728 22.4402   1
  -8   8   5 324.382 26.3587   3
  -8   8   5 361.171 27.1749   1
   0   8  -5 388.844 20.8567   2
   0  -8   5 380.164 23.3110   3
   8  -8  -5 293.413 21.4380   1
  -8   0  -5 367.814 22.9004   2
   0  -8   5 380.133 26.8384   1
   8  -8  -5 319.091 21.6558   2
   8   0   5 368.885 21.1964   3
  -8   5   5 2.74114 12.3222   1
  -8   5   5 16.6795 14.2293   3
   5   3   5 21.0417 10.0735   2
   3  -8   5 -4.9827 10.4346   3
  -8   3  -5 15.7210 10.9329   2
  -8   3  -5 13.1573 11.9276   1
   5   3   5 16.2267 10.8599   3
   3   5  -5 -3.7497 9.55172   2
   5  -8  -5 8.63956 9.76276   2
  -3   8  -5 -9.8877 8.72675   2
  -5  -3  -5 32.6500 10.8246   3
   8  -3   5 -1.9965 9.82914   3
  -3  -5   5 25.3315 11.6757   3
  -5   8   5 11.0540 9.76335   2
  -3  -5   5 5.29847 12.5798   1
   8  -5  -5 15.7175 9.86260   2
  -5   8   5 5.20471 13.9016   3
  -5  -3  -5 6.16788 10.2037   2
  -8   2   5 20.4336 13.7693   3
   2   6   5 30.4261 12.6866   3
  -8   2   5 33.0938 13.5671   1
  -8   6  -5 46.4711 11.5301   2
   2   6   5 43.5675 11.3522   2
   6  -8   5 48.1300 12.3002   3
   6   2  -5 23.3974 11.0664   2
  -8   6  -5 48.9390 14.8288   1
  -2   8   5 33.2062 10.6745   2
  -6  -2   5 14.9524 13.2331   1
   8  -2  -5 31.3209 11.1667   2
  -6   8  -5 30.0254 10.4039   2
  -6  -2   5 23.0747 12.2292   3
  -2  -6  -5 26.5008 10.2409   2
   8  -6   5 42.7757 11.6899   3
  -2   8   5 24.3933 13.9359   3
   7  -9  -5 205.598 17.1564   1
  -9   2  -5 274.652 22.2491   1
   7   2   5 272.018 20.0573   3
   7   2   5 281.124 19.4090   2
   2  -9   5 263.054 23.6745   1
  -9   2  -5 277.077 20.5437   2
   2   7  -5 262.034 18.5481   2
  -9   7   5 259.124 23.0169   1
  -9   7   5 246.847 23.9944   3
   2  -9   5 261.417 21.0329   3
  -7   9   5 271.096 19.6546   1
  -7  -2  -5 275.122 19.5529   3
  -7  -2  -5 296.563 20.4048   2
   9  -2   5 278.983 19.0719   3
  -2  -7   5 279.364 24.5947   1
  -2  -7   5 293.267 20.7528   3
  -7   9   5 248.799 19.0418   2
   9  -7  -5 273.859 19.9004   2
  -7   9   5 279.153 24.6038   3
  -2   9  -5 255.777 17.7891   2
  -9   5  -5 168.002 20.8692   1
   4   5   5 178.184 16.8422   2
   5   4  -5 185.980 18.3388   2
  -9   4   5 212.933 22.9593   3
   4   5   5 185.666 19.5896   3
  -9   5  -5 182.706 18.2100   2
   5  -9   5 181.764 19.0998   3
  -9   4   5 191.409 22.0081   1
  -5  -4   5 166.773 22.2160   1
   9  -5   5 182.724 17.7965   3
  -4   9   5 194.216 22.1204   3
  -5   9  -5 163.367 16.5601   2
  -5  -4   5 169.181 18.0605   3
  -4  -5  -5 171.106 16.0169   3
   9  -4  -5 208.378 18.2726   2
  -4   9   5 194.682 16.5594   2
  -4  -5  -5 188.414 17.1037   2
   8   1  -5 95.4242 14.0034   2
   1  -9  -5 107.707 11.9613   2
   1   8   5 69.7714 11.9020   2
  -9   8  -5 119.246 16.1550   2
   1   8   5 81.1667 14.4957   3
  -9   8  -5 144.269 21.8334   1
  -9   1   5 77.9540 15.8465   3
   8  -9   5 110.465 15.1178   3
  -9   1   5 72.8519 15.9299   1
  -1  -8  -5 95.5186 10.8048   2
  -8  -1   5 56.1536 13.8556   3
   9  -1  -5 107.336 14.5895   2
  -1   9   5 83.4185 14.4550   2
  -8   9  -5 138.849 21.5632   1
  -1   9   5 87.8836 15.6916   3
  -8  -1   5 67.1678 16.1710   1
  -8   9  -5 124.214 15.8382   2
   9  -8   5 129.416 17.4122   3
   9 -10  -5 2.46501 7.20403   2
   9 -10  -5 4.43088 10.3290   1
 -10   1  -5 17.7329 11.3664   2
   1 -10   5 28.2142 12.3383   3
   1 -10   5 21.0904 13.1916   1
 -10   9   5 18.6352 14.4303   3
 -10   1  -5 9.53464 11.9789   1
   9   1   5 14.9231 9.66565   3
 -10   9   5 13.3002 12.5738   1
   1   9  -5 5.19851 9.83989   2
  10  -9  -5 24.6575 11.5580   2
  -1  10  -5 19.7489 9.53485   2
  10  -1   5 29.9739 10.1417   3
  -9  -1  -5 29.3652 10.2934   3
  -9  -1  -5 32.6288 9.05774   1
  -9  10   5 15.5733 13.8998   3
  -9  -1  -5 19.2556 11.2298   2
  -1  -9   5 14.5784 13.5720   1
  -9  10   5 25.2427 12.0788   1
  -1  -9   5 24.6849 11.3860   3
 -10   6   5 339.144 26.3851   1
   4 -10   5 357.103 23.9789   3
   6   4   5 285.558 21.3296   2
 -10   4  -5 353.328 25.6411   1
   6 -10  -5 376.805 20.7821   2
   6   4   5 318.271 20.0764   3
 -10   6   5 343.191 27.4421   3
 -10   4  -5 365.641 22.8359   2
   4   6  -5 360.313 21.9731   2
  -4  -6   5 327.190 26.2387   1
  -6  -4  -5 331.477 20.2493   3
  10  -6  -5 373.454 22.0793   2
  -4  10  -5 362.796 20.6593   2
  -6  10   5 327.801 21.2993   2
  10  -4   5 359.638 22.2755   3
  -4  -6   5 351.335 22.5711   3
  -6  10   5 320.339 26.1593   3
  -6  -4  -5 363.010 22.4538   2
 -10   7  -5 43.2109 15.1485   1
   3 -10  -5 60.3545 10.8751   2
 -10   7  -5 51.8814 11.9781   2
 -10   3   5 62.2793 15.9736   1
   3   7   5 48.4930 11.2913   2
   3   7   5 56.5662 12.0299   3
   7   3  -5 39.8182 12.2216   2
 -10   3   5 51.2528 15.5862   3
   7 -10   5 54.0436 13.4570   3
  -3  10   5 51.8436 11.2094   2
  10  -7   5 59.9710 12.9679   3
  -7  -3   5 49.1955 15.1407   1
  -7  10  -5 58.5083 11.0895   2
  10  -3  -5 53.0389 12.6509   2
  -3  10   5 67.8366 15.3950   3
  -7  -3   5 48.3771 12.4154   3
  -7  10  -5 61.2131 16.1503   1
  -3  -7  -5 37.8179 10.5283   3
 -10  10  -5 777.074 35.5449   2
  10   0  -5 784.066 37.9220   2
 -10   0   5 771.934 41.8330   1
  10 -10   5 802.247 38.3343   3
 -10   0   5 804.605 38.8831   3
   0 -10  -5 764.764 34.9534   2
 -10  10  -5 809.909 42.4392   1
   0  10   5 848.381 38.3061   3
   0  10   5 797.249 35.7170   2
   0 -11   5 138.257 19.3757   3
 -11   0  -5 161.457 19.9175   1
   0  11  -5 170.749 16.0059   2
 -11  11   5 192.298 22.2962   1
  11   0   5 139.827 14.9542   3
 -11   0  -5 178.951 19.5168   2
   3 -11   5 131.588 18.5919   3
 -11   8   5 98.1340 16.4872   1
   3   8  -5 89.9224 12.8809   2
   8 -11  -5 106.493 12.8843   2
   8   3   5 104.917 13.8618   2
 -11   3  -5 85.4044 15.6738   1
 -11   3  -5 103.642 14.0892   2
 -11   8   5 79.6868 17.2290   3
  -3  11  -5 101.731 11.9657   2
  11  -8  -5 79.7443 12.6111   2
  -3  -8   5 87.7779 17.7675   1
  -8  -3  -5 84.0753 13.0625   2
  -8  11   5 107.393 17.4072   3
  11  -3   5 109.053 13.6695   3
  -3  -8   5 75.4499 13.3230   3
  -8  11   5 100.607 13.5064   2
 -11   6  -5 1751.02 67.4352   2
 -11   5   5 1715.74 71.0062   1
   6 -11   5 1630.67 68.9429   3
 -11   5   5 1725.20 70.6235   3
 -11   6  -5 1752.00 70.8700   1
   5   6   5 1646.60 66.9169   2
   6   5  -5 1789.95 67.2106   2
  -6  -5   5 1599.14 71.5584   1
  -5  -6  -5 1745.06 66.3866   2
  11  -6   5 1654.30 67.6216   3
  -5  11   5 1715.14 66.2054   2
  -5  11   5 1685.17 69.5179   3
  11  -5  -5 1827.12 67.8454   2
  -5  -6  -5 1597.28 64.7734   3
  -6  11  -5 1746.73 65.2349   2
  -6  -5   5 1648.69 66.9898   3
   2 -11  -5 339.650 20.0564   2
   9   2  -5 390.466 24.5759   2
 -11   2   5 302.408 26.0065   3
 -11   9  -5 332.290 21.9890   2
   2   9   5 379.188 23.4496   3
   9 -11   5 293.471 23.7115   3
 -11   9  -5 310.041 27.3997   1
   2   9   5 363.107 22.2768   2
 -11   2   5 306.957 28.0329   1
  -9  -2   5 358.058 23.6423   3
  -9  -2   5 337.410 28.5989   1
  -9  11  -5 341.741 21.1990   2
  -2  11   5 362.103 26.4846   3
  -9  11  -5 340.325 28.8034   1
  11  -9   5 321.979 23.4043   3
  11  -2  -5 340.141 24.3334   2
  -2  11   5 324.931 21.4706   2
  -2  -9  -5 371.886 20.9612   2
  10 -12  -5 74.2575 11.9260   2
   2 -12   5 55.2792 13.8484   3
 -12  10   5 79.0082 16.5346   1
 -12   2  -5 40.1897 12.9884   2
   2  10  -5 60.4504 12.0821   2
 -12   2  -5 50.6511 14.5810   1
 -10  -2  -5 74.3512 13.4668   2
 -10  12   5 77.7772 14.1747   1
  -2  12  -5 41.8868 10.9926   2
  -2 -10   5 62.0647 13.4859   3
  12  -2   5 36.6860 10.8522   3
   5   7  -5 413.582 24.6657   2
 -12   5  -5 420.283 29.1255   1
   5 -12   5 422.729 27.1453   3
 -12   7   5 416.672 29.8683   3
 -12   5  -5 396.933 25.0857   2
 -12   7   5 404.657 29.4270   1
   7   5   5 390.562 24.0938   2
   7 -12  -5 418.841 22.6221   2
  -5  -7   5 357.321 28.7936   1
  12  -7  -5 379.787 24.2529   2
  -5  -7   5 436.997 24.8516   3
  -7  12   5 404.869 23.6614   2
  -7  -5  -5 425.712 29.6219   2
  -7  12   5 388.773 28.2299   3
  12  -5   5 447.546 24.7366   3
  -5  12  -5 399.509 22.0878   2
   8   4  -5 204.800 21.1605   2
 -12   4   5 244.052 24.9984   3
 -12   8  -5 260.856 20.1094   2
   8 -12   5 236.890 21.6238   3
   4 -12  -5 236.157 17.1073   2
 -12   4   5 215.086 25.4749   1
 -12   8  -5 223.798 25.3161   1
   4   8   5 212.776 19.1182   2
  12  -4  -5 250.543 26.6916   2
  -4  -8  -5 215.738 17.9679   2
  -8  -4   5 220.528 19.2029   3
  -8  12  -5 228.986 25.9890   1
  12  -8   5 269.863 20.8994   3
  -8  12  -5 243.735 18.3358   2
  -4  12   5 258.807 23.9286   3
  -4  12   5 233.603 18.4704   2
  -8  -4   5 200.054 24.9558   1
   1  11   5 328.314 23.1937   3
 -12  11  -5 307.046 21.5981   2
   1  11   5 291.219 21.0864   2
 -12  11  -5 309.742 27.9505   1
 -12   1   5 298.811 25.1211   3
  11   1  -5 286.395 23.0271   2
   1 -12  -5 295.120 18.3754   2
  11 -12   5 312.249 23.8765   3
 -12   1   5 271.967 28.2961   1
  11   1  -5 314.998 24.4728   2
  -1  12   5 295.331 20.9128   2
  -1  12   5 279.379 24.5945   3
  -1 -11  -5 321.241 19.0231   2
 -11  12  -5 289.952 28.6750   1
  12 -11   5 293.339 23.4586   3
 -11  -1   5 313.331 28.8318   1
  12  -1  -5 305.597 24.4678   2
 -11  -1   5 324.052 23.0327   3
   1 -13   5 127.965 20.1625   1
  12 -13  -5 150.435 21.1351   2
   1 -13   5 173.118 20.2025   3
   1  12  -5 187.484 16.6967   2
 -13  12   5 132.309 19.7742   3
 -13   1  -5 135.341 18.4690   1
 -13  12   5 153.946 22.9287   1
 -13   1  -5 161.301 18.4663   2
  13 -12  -5 191.046 24.0257   2
  -1 -12   5 143.593 23.1809   1
 -12  13   5 168.800 21.6477   1
 -12  -1  -5 125.289 19.4995   1
 -12  -1  -5 140.897 19.4403   2
  -1  13  -5 145.240 16.0128   2
 -12  13   5 143.855 20.2183   3
  -1 -12   5 178.701 19.7405   3
   9 -13  -5 267.401 18.5689   2
   9   4   5 242.598 21.1429   2
 -13   4  -5 249.730 25.1117   1
   4   9  -5 230.133 23.5462   2
   4 -13   5 262.379 23.0393   3
 -13   9   5 275.298 28.1282   3
 -13   4  -5 269.408 22.0857   2
 -13   9   5 278.861 26.5494   1
  -9  13   5 265.925 26.8314   3
  13  -9  -5 248.671 20.4040   2
  -4  -9   5 255.997 26.9094   1
  -4  13  -5 246.913 23.6946   2
  -9  -4  -5 282.923 21.3210   2
  13  -4   5 286.413 20.0890   3
   7   6  -5 180.026 19.7717   2
   6   7   5 146.014 18.1188   2
 -13   7  -5 131.675 15.6229   2
 -13   7  -5 142.628 20.1775   1
   6 -13  -5 169.641 15.2569   2
 -13   6   5 149.874 20.7513   3
 -13   6   5 160.786 24.0110   1
  -7  -6   5 157.410 24.3697   1
  -7  13  -5 148.882 24.0206   1
  -6  13   5 138.416 16.4489   2
  -7  13  -5 179.254 21.3477   2
  -7  -6   5 173.436 17.8865   3
  13  -7   5 150.294 17.9709   3
  13  -6  -5 131.138 16.0419   2
  -6  13   5 161.727 19.7184   3
 -13   3   5 372.381 30.8514   1
  10   3  -5 357.445 25.5433   2
 -13  10  -5 374.383 24.0312   2
 -13  10  -5 352.838 30.3181   1
   3 -13  -5 391.848 24.8907   2
  10   3  -5 418.783 26.6135   2
 -13   3   5 335.793 27.4456   3
   3  10   5 397.978 29.3641   2
  10 -13   5 358.115 26.1778   3
  13  -3  -5 376.468 26.6900   2
 -10  13  -5 365.672 31.0618   1
  -3  13   5 358.453 27.6083   3
 -10  13  -5 414.449 22.6876   2
 -10  -3   5 400.493 24.1593   3
  -3  13   5 348.093 22.7553   2
 -10  -3   5 355.052 30.7552   1
  -3 -10  -5 421.917 22.9565   2
  13   0  -5 194.195 23.1109   2
 -13  13  -5 167.566 26.2571   1
  13 -13   5 183.459 20.9755   3
   0  13   5 187.375 18.5135   2
 -13   0   5 189.598 26.2120   1
 -13   0   5 211.663 21.7833   3
 -13  13  -5 179.404 18.8818   2
   0  13   5 229.685 22.0782   3
   0 -14   5 286.040 29.0387   1
 -14  14   5 289.822 28.9319   3
 -14   0  -5 279.506 25.9812   1
 -14  14   5 350.752 26.9293   1
 -14   0  -5 292.477 24.6514   2
   0 -14   5 266.085 29.5554   3
 -14  11   5 135.299 19.7523   1
   3  11  -5 85.6842 13.7225   2
   3 -14   5 107.550 20.3723   3
 -14  11   5 104.071 18.8717   3
  11 -14  -5 145.338 16.6419   2
 -14   3  -5 128.906 19.0021   1
 -14   3  -5 155.339 18.0251   2
  -3 -11   5 117.626 17.7842   3
  14 -11  -5 119.946 19.1420   2
 -11  14   5 122.706 19.9583   3
 -11  -3  -5 116.063 15.3547   2
  -3 -11   5 105.243 19.4889   1
   6   8  -5 77.2470 13.9188   2
 -14   8   5 51.8049 17.1691   3
   8   6   5 66.4719 14.8305   2
   8 -14  -5 70.0573 11.7457   2
   6 -14   5 71.8544 15.5039   3
 -14   6  -5 85.9488 14.1841   2
 -14   8   5 60.5249 23.4624   1
 -14   6  -5 59.0305 17.1509   1
  -8  -6  -5 54.6658 11.1513   2
  -6  -8   5 79.0350 17.9986   1
  -8  14   5 68.8525 16.8902   3
  14  -8  -5 62.1420 13.8593   2
  -6  -8   5 82.5981 12.9351   3
  14  -6   5 78.7986 13.2594   3
  -8  14   5 61.4772 12.5527   2
 -14   9  -5 251.639 20.8480   2
 -14   5   5 227.030 27.4475   1
   5   9   5 220.274 20.1104   2
   9 -14   5 192.568 22.4353   3
 -14   5   5 213.347 25.2167   3
 -14   9  -5 267.087 27.6330   1
   9   5  -5 214.367 30.1520   2
  -9  -5   5 240.926 19.2060   3
  14  -5  -5 266.942 23.0259   2
  -9  -5   5 183.234 27.0072   1
  -9  14  -5 244.968 28.0421   1
  -5  14   5 203.250 18.4589   2
  -5  -9  -5 230.210 20.0706   2
  -9  14  -5 260.207 18.2729   2
  -5  14   5 222.314 25.0455   3
 -14   2   5 51.0889 17.8252   1
  12 -14   5 34.7091 13.2993   3
 -14  12  -5 33.5520 17.8106   1
   2  12   5 37.7405 11.9990   2
  12   2  -5 20.9861 14.0012   2
 -14   2   5 42.3877 15.1480   3
 -14  12  -5 23.6501 11.9261   2
 -12  14  -5 34.7261 11.4664   2
  -2  14   5 42.0860 11.8669   2
  -2 -12  -5 52.9185 16.3966   2
 -12  -2   5 22.8319 16.9045   1
 -12  14  -5 57.4066 18.2912   1
  -2  14   5 38.9283 15.6044   3
  14  -2  -5 44.4516 15.0994   2
 -12  -2   5 42.0650 12.5038   3
 -15   2  -5 14.8267 12.7250   2
   2  13  -5 16.4854 11.2705   2
   2 -15   5 19.9867 13.7045   3
 -15   2  -5 20.5649 14.7767   1
 -15  13   5 47.6010 17.1474   1
 -15  13   5 15.8578 17.2629   3
  -2 -13   5 20.6527 16.4422   1
 -13  15   5 22.1876 17.0166   3
 -13  -2  -5 32.6991 13.2887   2
  -2 -13   5 25.7697 12.6204   3
 -13  15   5 54.7836 14.4584   1
 -15  10   5 1066.88 51.0791   3
   5  10  -5 997.438 45.0012   2
   5 -15   5 1053.45 48.5630   3
 -15   5  -5 1068.62 46.9639   2
 -15  10   5 1117.02 52.0726   1
 -15   5  -5 1033.82 57.2095   1
  -5 -10   5 1004.25 52.1635   1
 -10  -5  -5 1085.49 54.8070   2
 -10  15   5 1043.77 50.3183   3
  -5 -10   5 981.798 45.1830   3
  15 -10  -5 1024.72 45.5749   2
 -15   8  -5 208.725 21.3978   2
 -15   7   5 212.516 27.6022   3
   7   8   5 227.024 21.5587   2
   8 -15   5 236.066 23.7885   3
 -15   8  -5 190.653 26.9086   1
 -15   7   5 264.966 28.2581   1
   8   7  -5 255.849 22.7173   2
   8   7  -5 223.136 21.6550   2
  -8  -7   5 239.959 18.9364   3
  -8  -7   5 237.794 27.7090   1
  -7  -8  -5 278.875 20.1382   2
  -8  15  -5 189.559 17.8276   2
  -7  15   5 230.453 25.6606   3
  -8  15  -5 230.812 28.1890   1
  15  -7  -5 239.518 22.2115   2
  -7  15   5 252.931 19.6739   2
 -15   4   5 21.9516 17.0359   1
  11   4  -5 22.4813 14.0336   2
 -15   4   5 28.2330 18.5876   3
 -15  11  -5 9.04357 16.9930   1
  11 -15   5 22.7496 13.1239   3
 -15  11  -5 20.5405 12.2345   2
 -11  -4   5 8.73023 15.7642   1
 -11  -4   5 38.3250 11.2867   3
  -4  15   5 22.7574 15.3148   3
  -4  15   5 17.7216 10.9192   2
 -11  15  -5 16.4691 18.1837   1
  15  -4  -5 3.15093 14.1767   2
 -11  15  -5 -0.9873 9.98666   2
 -15   1   5 94.7420 20.6580   1
 -15  14  -5 87.9581 22.0947   1
  14   1  -5 135.571 19.5207   2
 -15   1   5 144.537 21.6970   3
 -15  14  -5 107.626 15.2476   2
 -14  -1   5 133.454 23.0095   1
 -14  15  -5 114.469 22.1799   1
  15  -1  -5 124.246 19.4110   2
 -14  15  -5 106.904 14.7126   2
  -1  15   5 117.684 18.3022   3
 -16  15   5 391.461 34.0018   3
 -16  15   5 483.957 32.5146   1
 -16   1  -5 439.792 29.8365   2
   1 -16   5 395.309 28.6810   3
 -15  16   5 395.442 33.9169   3
 -15  -1  -5 445.138 29.7860   1
 -15  -1  -5 481.482 35.5562   2
 -15  16   5 512.229 35.4409   1
  -1 -15   5 411.475 27.6062   3
  -1 -15   5 429.645 34.5388   1
   4  12  -5 466.745 26.6386   2
 -16   4  -5 447.450 29.0361   2
 -16   4  -5 385.446 33.5838   1
 -16  12   5 408.024 33.1582   3
 -16  12   5 473.750 34.2238   1
   4 -16   5 417.963 29.8118   3
 -12  -4  -5 518.708 29.4854   2
  -4 -12   5 440.826 26.4899   3
 -12  16   5 422.146 33.0756   3
  -4 -12   5 438.686 34.2882   1
   7   9  -5 162.449 20.8527   2
   7   9  -5 131.717 16.4461   2
 -16   7  -5 127.852 21.8506   1
   7 -16   5 144.478 21.9500   3
 -16   7  -5 163.003 20.0258   2
 -16   9   5 137.239 22.4029   1
 -16   9   5 155.739 22.6176   3
  -9  16   5 131.733 20.9458   3
  -7  16  -5 131.639 23.1054   1
  -7  -9   5 149.455 17.6698   3
  -7  -9   5 133.302 21.2339   1
  16  -9  -5 158.831 20.9667   2
 -16   6   5 97.7258 19.8384   3
 -16   6   5 114.425 21.3734   1
 -16  10  -5 93.0839 15.2653   2
 -16  10  -5 89.5900 20.2278   1
  10   6  -5 92.7207 16.9633   2
  -6  16   5 105.368 20.2516   3
 -10  16  -5 100.960 13.1434   2
 -10  -6   5 143.243 17.1857   3
  -6  16   5 112.979 15.0652   2
 -10  16  -5 92.6268 21.6295   1
  16  -6  -5 99.1785 17.2940   2
  13   3  -5 176.181 21.3336   2
 -16  13  -5 193.869 20.4320   2
 -16   3   5 215.108 28.5161   3
 -16  13  -5 154.571 24.0207   1
 -16   3   5 216.132 29.5226   1
 -13  16  -5 143.918 24.3456   1
 -13  -3   5 184.564 28.9815   1
  16  -3  -5 189.330 25.1922   2
 -13  -3   5 228.115 19.2585   3
  -3  16   5 186.181 24.6354   3
 -13  16  -5 169.179 19.4567   2
 -16   0   5 331.945 53.7530   1
 -16   0   5 505.205 28.2665   3
  16   0  -5 470.488 33.7915   2
 -16  16  -5 439.028 27.2942   2
 -17  14   5 314.037 29.7060   1
 -17   3  -5 265.453 24.6657   2
 -17  14   5 225.929 29.0103   3
   3  14  -5 186.342 21.5304   2
   3  14  -5 237.753 20.7538   2
 -17   3  -5 229.239 28.3328   1
 -14  17   5 233.567 28.9434   3
  -3 -14   5 224.377 27.7387   1
  -3 -14   5 223.908 20.9635   3
 -17  11   5 236.633 29.9978   3
 -17  11   5 295.070 31.5327   1
 -17   6  -5 285.684 30.7272   1
 -17   6  -5 278.993 24.3034   2
   6  11  -5 312.807 24.0009   2
 -11  17   5 272.595 29.4719   3
  -6 -11   5 317.439 30.8995   1
 -17   8   5 38.3200 18.0927   1
   9   8  -5 10.1096 14.2259   2
 -17   9  -5 11.2244 18.2613   1
 -17   8   5 25.0013 18.3517   3
 -17   9  -5 26.4473 13.2878   2
  17  -8  -5 31.0905 13.6513   2
  -9  -8   5 26.7956 16.9640   1
  -9  17  -5 60.1344 21.0906   1
  -8  17   5 -7.0902 16.8662   3
 -17  12  -5 25.8537 13.2971   2
 -17  12  -5 29.9524 19.5529   1
  12   5  -5 58.1259 16.7877   2
 -17   5   5 60.4601 18.0323   3
 -17   5   5 56.0685 19.1648   1
  -5  17   5 47.4396 18.0853   3
  17  -5  -5 43.5255 16.7282   2
 -12  17  -5 54.3340 21.8626   1
 -12  17  -5 42.6672 12.0153   2
 -12  -5   5 52.2959 19.2984   1
 -17   2   5 59.3825 22.5116   1
  15   2  -5 33.5039 17.1324   2
 -17  15  -5 41.2884 12.7569   2
 -17   2   5 90.0768 16.5083   3
 -15  -2   5 57.7511 22.5549   1
 -15  17  -5 23.1934 23.4736   1
  17  -2  -5 64.1896 18.5425   2
 -15  17  -5 47.1779 13.6273   2
 -18  13   5 35.4223 18.4779   1
 -18   5  -5 7.87238 12.9914   2
 -18  13   5 2.09622 19.0004   3
   5  13  -5 13.1897 15.4212   2
 -18   5  -5 13.6469 17.2900   1
  -5 -13   5 21.5935 17.2640   1
 -18  10   5 41.2955 19.5443   3
 -18   8  -5 36.8623 14.5034   2
 -18  10   5 56.3954 20.1491   1
   8  10  -5 52.8402 15.5544   2
 -18   8  -5 42.9318 20.4680   1
  -8 -10   5 69.9526 19.4367   1
  -8  18  -5 34.4321 20.3091   1
 -10  18   5 55.4507 20.0839   3
  11   7  -5 151.106 19.9636   2
 -18   7   5 176.211 29.5613   1
 -18  11  -5 136.918 24.1545   1
 -18   7   5 125.587 21.7496   3
 -18  11  -5 155.470 21.1700   2
 -11  -7   5 136.911 23.4928   1
  18  -7  -5 143.341 20.0022   2
 -11  18  -5 184.484 27.0511   1
  -7  18   5 141.292 22.8664   3
  14   4  -5 212.709 27.3289   2
 -18   4   5 186.953 30.4395   1
 -18  14  -5 171.622 26.8952   1
 -18   4   5 239.608 26.6089   3
 -14  -4   5 231.699 30.6934   1
 -14  18  -5 183.831 31.0686   1
  18  -4  -5 207.558 26.9766   2
  -4  18   5 184.763 23.5316   3
 -14  18  -5 169.544 23.8325   2
 -19   7  -5 82.7874 13.4581   3
   7  12  -5 47.8315 15.2605   2
 -19   7  -5 63.4480 15.7415   2
 -19  12   5 85.4448 21.7888   1
 -19   7  -5 64.2419 21.6605   1
 -12  19   5 47.3104 23.6090   3
  -7  19  -5 58.6101 22.5284   1
  -7 -12   5 48.9366 21.6276   1
 -19   9   5 28.3389 28.8008   1
 -19   9   5 -17.089 17.7166   3
 -19  10  -5 -1.6046 11.8064   2
 -19  10  -5 -6.6847 18.6271   1
  10   9  -5 -1.4612 26.8578   2
  -9  19   5 -21.044 17.6339   3
 -10  19  -5 1.26538 19.8077   1
 -10  -9   5 18.4940 18.8251   1
 -19  13  -5 -18.143 18.4817   1
 -19   6   5 16.7209 18.2088   1
 -19  13  -5 10.0274 12.3113   2
 -19   6   5 9.85491 16.4373   3
  13   6  -5 16.1514 16.1004   2
  19  -6  -5 27.2980 16.4151   2
  -6  19   5 11.1614 18.1424   3
 -13  19  -5 -13.578 19.5195   1
 -13  -6   5 13.1364 17.2954   1
   0   0  -6 2782.64 109.660   1
   0   0   6 3204.65 120.973   1
   0   0  -6 2884.98 108.962   2
   0   0   6 2867.92 110.800   3
  -2   1   6 132.513 17.1641   3
   1  -2   6 135.115 17.8788   1
   1  -2  -6 95.8605 13.8262   2
   1   1  -6 134.351 16.3215   2
   1   1   6 130.605 18.8688   3
  -2   1  -6 124.008 14.0978   2
   1  -2  -6 113.749 16.5766   1
   1  -2   6 129.167 16.3057   3
  -2   1   6 108.265 17.4585   1
   2  -1  -6 113.864 14.1742   2
  -1  -1   6 141.822 18.3895   1
  -1   2   6 120.925 16.5138   3
  -1   2  -6 127.429 14.5427   2
  -1   2   6 116.715 16.2040   1
   2  -1   6 120.337 16.2708   3
  -1  -1  -6 158.116 18.5819   1
   2  -1  -6 122.894 18.1673   1
  -1  -1   6 121.375 16.2328   3
  -1  -1  -6 124.029 14.3891   2
   3  -3  -6 726.915 33.4715   1
  -3   3   6 702.579 32.8822   1
   0  -3   6 694.937 34.7919   3
   3  -3  -6 674.383 32.9573   2
   3   0   6 688.150 34.5384   3
  -3   0  -6 736.221 32.8401   1
   0  -3   6 699.275 35.5653   1
   0   3  -6 696.596 32.8096   2
  -3   0  -6 702.123 33.3492   2
  -3   3   6 719.339 36.6192   3
  -3   3   6 694.332 36.4510   2
  -3   3  -6 301.367 20.4523   2
   0  -3  -6 259.273 20.2697   2
   0   3   6 240.244 18.8447   2
   0   3   6 222.748 22.0617   3
  -3   0   6 240.511 22.9108   3
   3   0  -6 275.799 31.9351   2
   3  -3   6 304.338 21.9406   3
  -3   0   6 248.206 21.5088   1
  -4   2   6 147.418 18.1003   1
  -4   2  -6 151.744 17.9880   2
   2  -4   6 123.913 18.3466   3
   2   2   6 128.703 18.3271   3
   2  -4  -6 136.209 17.6936   2
  -4   2   6 143.347 21.5149   3
   2  -4  -6 150.845 16.0458   1
   2   2  -6 147.125 17.6502   2
   2   2   6 139.858 16.8705   2
   2  -4   6 125.558 16.5502   1
  -2   4   6 136.830 16.1468   2
  -2   4   6 138.980 20.9886   3
   4  -2   6 116.269 15.3973   3
  -2  -2   6 134.976 19.2075   3
  -2  -2   6 146.725 19.5918   1
  -2  -2  -6 126.715 17.4649   2
   4  -2  -6 137.525 17.3559   2
  -2   4  -6 136.440 17.4703   2
  -5   4   6 37.0520 14.7578   3
   4  -5  -6 42.7205 11.3971   2
  -5   1  -6 52.6532 14.9712   1
   4  -5  -6 63.0240 18.4564   1
   1  -5   6 49.0159 13.3384   1
   1  -5   6 32.5073 12.6975   3
   1   4  -6 50.8235 12.2246   2
  -5   1  -6 39.5491 11.8091   2
  -5   4   6 54.3724 12.5511   1
  -5   1  -6 57.5936 10.7913   1
   4   1   6 34.4027 12.1424   3
  -4   5   6 36.6865 14.8252   3
   5  -4  -6 60.4521 12.7958   2
  -4  -1  -6 80.5341 13.2366   2
  -4   5   6 56.5551 11.4648   1
  -1  -4   6 46.3801 14.0615   1
  -1   5  -6 52.4113 11.6765   2
  -4  -1  -6 65.5601 10.4287   1
   5  -1   6 40.9442 12.0558   3
  -1  -4   6 59.5043 13.7606   3
  -4   5   6 44.2648 11.4829   2
   4   1  -6 332.042 21.7831   2
   1   4   6 285.835 22.5615   3
  -5   4  -6 292.795 20.9228   2
   1  -5  -6 277.299 20.5933   2
   4  -5   6 292.721 21.4826   3
   1   4   6 279.277 20.2202   2
  -5   1   6 211.323 24.2546   3
  -5   1   6 238.834 22.4416   1
  -1   5   6 248.099 23.6776   3
  -1  -4  -6 324.725 21.0889   2
   5  -4   6 278.662 21.2281   3
   5  -1  -6 254.439 26.8956   2
  -4  -1   6 266.133 23.4255   3
  -4   5  -6 336.927 21.2215   2
  -4  -1   6 296.749 23.3255   1
  -6   6   6 155.948 17.0937   2
  -6   6   6 168.844 20.0771   3
   0   6  -6 176.232 17.4691   2
  -6   0  -6 181.546 15.4236   1
   6   0   6 149.947 17.5904   3
  -6   0  -6 170.232 18.4616   2
   6  -6  -6 186.734 18.4381   2
   0  -6   6 127.452 18.9545   3
  -6   0  -6 175.375 18.1689   1
   0  -6   6 136.833 21.1276   1
   6  -6  -6 184.787 17.6282   1
   3  -6   6 405.561 24.6467   3
  -6   3  -6 401.986 23.9023   2
  -6   3   6 366.239 24.8924   1
   3   3  -6 357.326 23.3942   2
   3  -6  -6 397.669 23.4179   2
  -6   3  -6 428.874 26.1942   1
  -6   3   6 350.720 27.4034   3
   3   3   6 360.270 23.9592   3
   3   3   6 355.321 22.6071   2
  -3   6   6 381.121 26.8723   3
  -3   6  -6 402.988 23.3887   2
  -3   6   6 361.983 22.4620   2
  -3  -3   6 333.978 24.6715   3
  -3  -3  -6 354.491 23.2691   2
   6  -3  -6 375.529 23.8644   2
   6  -3   6 376.125 23.5767   3
  -3  -3   6 346.510 26.2993   1
   0   6   6 949.613 44.1855   3
  -6   0   6 925.792 44.6045   3
   0   6   6 960.039 41.8601   2
   0  -6  -6 1016.55 42.0062   2
  -6   0   6 919.706 45.0707   1
   6  -6   6 932.435 43.6489   3
  -6   6  -6 979.563 41.9089   2
   6   0  -6 1022.94 42.5288   2
  -7   2  -6 123.507 18.3878   1
   2   5  -6 113.888 14.4446   2
   2  -7   6 116.619 17.5327   3
   2  -7   6 141.780 20.7529   1
  -7   5   6 114.188 17.8057   3
  -7   2  -6 135.622 15.6046   2
   5  -7  -6 133.287 14.9914   2
  -7   5   6 130.348 18.1549   1
   5   2   6 131.980 15.8253   3
  -2  -5   6 119.321 17.6964   1
  -5  -2  -6 111.008 15.0558   2
  -5   7   6 109.025 14.6456   2
  -2   7  -6 135.958 16.2607   2
  -2  -5   6 99.6407 15.3398   3
   7  -2   6 118.046 16.2920   3
   7  -5  -6 138.130 15.2199   2
  -5   7   6 123.518 18.9745   3
  -7   5  -6 110.302 17.1772   1
   2  -7  -6 82.3054 17.0020   2
   2   5   6 92.4685 14.4909   3
   5  -7   6 100.622 15.0327   3
   2   5   6 107.273 22.1127   2
  -7   5  -6 109.037 14.1762   2
  -7   2   6 84.7014 16.7926   3
   5   2  -6 100.190 14.2416   2
  -7   2   6 95.2214 16.0444   1
  -2   7   6 99.2765 13.2751   2
   7  -2  -6 83.3914 21.5856   2
  -5  -2   6 107.703 15.9653   3
  -2  -5  -6 110.697 13.9167   2
  -2   7   6 87.9018 16.5210   3
  -5   7  -6 114.290 13.9781   2
  -5  -2   6 96.5476 16.7144   1
   7  -5   6 119.963 17.4358   3
  -8   7   6 51.6477 13.1045   1
  -8   7   6 34.9229 15.7255   3
   1  -8   6 47.7198 14.4957   1
   1  -8   6 52.6332 13.0843   3
   7  -8  -6 15.4996 10.3936   1
   1   7  -6 42.7396 11.4945   2
  -8   1  -6 35.6134 12.7265   1
   7   1   6 38.9131 11.1353   3
   7  -8  -6 36.9212 11.6363   2
  -8   1  -6 46.5668 14.9349   2
   8  -7  -6 36.7022 11.5260   2
  -1  -7   6 46.4416 15.6535   1
  -7   8   6 34.4759 13.2886   1
  -1   8  -6 41.0649 11.2466   2
  -7   8   6 33.7566 16.3239   3
   8  -1   6 61.4925 12.5011   3
  -7  -1  -6 52.8040 12.6352   2
  -7   8   6 46.4980 21.6903   2
  -1  -7   6 47.2372 13.0192   3
   4  -8   6 246.475 21.0890   3
   4   4   6 254.882 20.1674   3
   4   4  -6 271.607 20.5462   2
  -8   4   6 222.128 24.3202   3
   4   4   6 239.603 19.5639   2
  -8   4  -6 275.016 20.9748   2
  -8   4  -6 268.463 23.5069   1
  -8   4   6 235.884 22.5803   1
  -4  -4   6 237.083 24.3250   1
  -4  -4   6 233.299 22.1603   3
  -4  -4  -6 260.771 20.5131   2
  -4   8  -6 244.827 19.6413   2
  -4   8   6 225.358 19.1626   2
   8  -4   6 226.588 20.3931   3
   8  -4  -6 273.263 21.1516   2
  -4   8   6 250.608 24.4892   3
   7  -8   6 267.332 21.8723   3
   1   7   6 263.184 19.8892   2
   1  -8  -6 221.750 19.8703   2
  -8   7  -6 245.482 25.4113   1
  -8   7  -6 238.574 20.3884   2
   7   1  -6 248.929 21.0906   2
  -8   1   6 242.349 24.3414   1
   1   7   6 280.532 23.1627   3
  -8   1   6 237.535 24.4373   3
  -7   8  -6 261.522 24.8786   1
  -1   8   6 214.791 19.3444   2
   8  -7   6 277.834 22.0162   3
   8  -1  -6 232.036 21.0844   2
  -7   8  -6 248.569 20.5445   2
  -1  -7  -6 244.882 21.6230   2
  -7  -1   6 272.420 23.0365   3
  -7  -1   6 281.885 25.4532   1
  -1   8   6 215.908 23.1351   3
  -9   0  -6 457.745 27.6979   1
   0  -9   6 541.005 29.2697   3
   9   0   6 508.640 26.6427   3
   0   9  -6 464.652 26.2572   2
  -9   9   6 490.579 28.0974   1
  -9   0  -6 467.054 27.9459   2
   9  -9  -6 444.730 27.0897   2
   6  -9  -6 34.3091 11.6002   2
  -9   3  -6 59.8576 14.4933   1
   3  -9   6 32.6529 13.1176   3
   6   3   6 19.1853 10.4857   3
  -9   3  -6 50.8736 13.2088   2
  -9   6   6 28.9273 13.6180   1
  -9   6   6 22.7194 15.9446   3
   3   6  -6 23.0781 11.6261   2
   9  -3   6 39.4590 11.6856   3
   9  -6  -6 25.1320 11.6657   2
  -6  -3  -6 42.5110 12.2734   2
  -6   9   6 40.5435 16.0136   3
  -3  -6   6 32.2097 15.2087   1
  -6   9   6 36.7293 11.4982   2
  -3   9  -6 43.7291 11.3689   2
  -3  -6   6 11.8740 11.7174   3
   6  -9   6 57.2388 14.2455   3
   3   6   6 71.3273 13.1977   3
  -9   3   6 72.1469 15.9821   1
   3   6   6 65.3804 12.5757   2
  -9   6  -6 65.5472 13.5210   2
  -9   6  -6 58.0263 15.9202   1
  -9   3   6 72.6617 17.1587   3
   6   3  -6 49.3569 12.6358   2
  -6  -3   6 69.6051 16.4923   1
  -3   9   6 79.7439 16.6227   3
  -6   9  -6 61.0601 12.2042   2
  -3  -6  -6 61.7891 20.4647   2
   9  -6   6 48.4843 13.3213   3
  -6  -3   6 49.8580 13.7722   3
  -3   9   6 64.0846 12.0480   2
   9  -3  -6 66.0776 13.2149   2
   0  -9  -6 320.480 21.9862   2
   9  -9   6 359.216 36.2196   3
  -9   9  -6 325.649 22.3608   2
  -9   9  -6 315.547 28.4729   1
  -9   0   6 266.196 27.3716   1
  -9   0   6 335.711 25.8885   3
   9   0  -6 345.161 24.5801   2
   0   9   6 353.742 25.3144   3
   0   9   6 289.721 22.2201   2
   8   2   6 11.8324 9.93617   3
 -10   8   6 19.5839 13.1020   1
   2   8  -6 40.7773 11.8291   2
 -10   8   6 23.8362 16.8466   3
   2 -10   6 14.7789 12.2954   3
   8 -10  -6 11.4873 10.9536   2
   2 -10   6 27.9519 15.3496   1
 -10   2  -6 6.44998 11.4515   2
  10  -8  -6 8.92570 11.4935   2
  -2  -8   6 16.3577 11.4741   3
  -8  -2  -6 39.5689 13.5273   2
  -2  10  -6 8.38510 11.0270   2
  10  -2   6 7.04542 10.4291   3
  -2  -8   6 16.9024 17.1151   1
 -10   5   6 1020.77 49.4280   3
   5   5   6 1022.93 45.1403   2
 -10   5  -6 1040.46 48.5261   1
 -10   5   6 1049.19 48.3800   1
 -10   5  -6 1031.46 45.5271   2
   5 -10   6 976.811 47.0875   3
   5   5   6 1130.14 44.5964   3
   5   5  -6 1010.13 44.8324   2
  -5  10   6 1076.99 49.3132   3
  -5  10  -6 1010.98 43.8629   2
  10  -5  -6 1061.74 45.6124   2
  -5  -5  -6 1020.78 44.9842   2
  -5  -5   6 1012.59 49.7698   1
  10  -5   6 1082.30 46.3359   3
  -5  10   6 1049.41 44.8783   2
  -5  -5   6 1026.10 46.1764   3
   2   8   6 266.876 20.5248   2
 -10   2   6 251.716 25.6853   3
 -10   8  -6 219.282 25.8590   1
   2   8   6 296.723 22.1480   3
   8 -10   6 226.467 23.2063   3
   2 -10  -6 290.130 20.0737   2
   8   2  -6 253.887 22.7380   2
 -10   8  -6 236.016 21.0083   2
 -10   2   6 262.147 25.6304   1
  -2  10   6 233.303 20.0388   2
  -8  10  -6 271.921 32.8591   1
  -8  -2   6 287.960 23.4951   3
  10  -2  -6 270.349 22.7081   2
  10  -8   6 244.205 22.2863   3
  -8  10  -6 259.654 20.4155   2
 -11   1  -6 230.554 21.6203   2
   1 -11   6 178.543 24.9223   1
   1  10  -6 273.227 20.2301   2
  10   1   6 227.531 18.4147   3
 -11  10   6 222.038 26.7041   3
 -11   1  -6 189.920 22.6670   1
 -11  10   6 241.664 22.7164   1
 -10  11   6 248.196 21.6429   1
  -1  11  -6 248.648 19.2436   2
  -1 -10   6 195.165 25.3550   1
  11 -10  -6 289.042 31.5456   2
 -10  -1  -6 270.557 22.2088   2
 -10  11   6 230.531 26.3150   3
  11  -1   6 233.153 19.0362   3
  -1 -10   6 222.268 21.4055   3
   7 -11  -6 155.292 15.8036   2
 -11   7   6 164.208 22.9301   1
   4 -11   6 124.505 21.7019   3
 -11   4  -6 147.744 22.6582   1
 -11   4  -6 166.903 19.8092   2
   7   4   6 164.709 15.8924   3
 -11   7   6 142.147 20.7287   3
   4   7  -6 174.951 19.4883   2
  -4  11  -6 136.738 16.6545   2
  -7  11   6 141.663 17.5497   2
  -7  11   6 129.710 30.0662   3
  -4  -7   6 166.667 24.1605   1
  -7  -4  -6 193.759 19.9309   2
  11  -7  -6 125.503 16.0704   2
  11  -4   6 150.268 18.3403   3
  -4  -7   6 167.830 19.5364   3
   4 -11  -6 54.5441 12.1267   2
 -11   4   6 55.0546 15.9820   1
   7   4  -6 57.2327 14.0401   2
 -11   7  -6 64.6872 13.1486   2
   7 -11   6 58.3190 14.8304   3
   4   7   6 64.4613 12.3455   3
 -11   7  -6 60.2878 16.5573   1
 -11   4   6 43.1202 16.1711   3
   4   7   6 68.4554 13.0882   2
  -4  -7  -6 61.6989 12.3738   2
  -7  11  -6 42.1197 16.8918   1
  -7  -4   6 54.7683 13.7237   3
  -7  -4   6 56.0556 16.5518   1
  11  -4  -6 57.7504 13.7770   2
  11  -7   6 69.8615 14.1581   3
  -4  11   6 56.5316 16.6286   3
  -4  11   6 43.6316 11.7085   2
 -11   1   6 313.740 26.7833   3
   1  10   6 372.635 25.4180   3
  10   1  -6 385.604 26.5439   2
 -11  10  -6 314.836 26.1245   2
 -11  10  -6 348.699 29.9402   1
 -11   1   6 315.889 28.9585   1
   1  10   6 359.460 23.6672   2
   1 -11  -6 337.758 21.7534   2
  10 -11   6 316.982 25.5675   3
  11  -1  -6 371.796 26.1146   2
  -1  11   6 345.685 26.4828   3
 -10  -1   6 329.019 29.8057   1
  -1  11   6 318.956 23.0441   2
 -10  11  -6 331.615 30.3479   1
  11 -10   6 350.384 25.5773   3
 -10  -1   6 327.230 25.4853   3
 -10  11  -6 339.981 23.1034   2
  -1 -10  -6 346.938 23.3382   2
   0 -12   6 463.398 33.7497   1
  12   0   6 482.243 25.2615   3
 -12  12   6 467.699 29.6668   1
   0  12  -6 441.481 25.9214   2
   0 -12   6 479.793 29.3048   3
 -12   0  -6 405.567 28.8834   1
 -12  12   6 442.327 33.6739   3
   9   3   6 335.158 20.8512   3
   9 -12  -6 332.138 22.3514   2
 -12   3  -6 363.745 24.7990   2
 -12   9   6 345.067 27.0887   1
 -12   3  -6 320.710 27.1342   1
   3   9  -6 298.904 22.5604   2
 -12   9   6 294.124 29.6882   3
   3 -12   6 355.787 25.9834   3
  -9  12   6 311.674 28.6651   3
  -9  -3  -6 310.736 23.8039   2
  -3  12  -6 327.151 21.5906   2
  12  -9  -6 325.756 23.7949   2
  -3  -9   6 323.110 29.4513   1
  12  -3   6 361.503 22.9601   3
  -3  -9   6 312.169 23.9986   3
 -12   6  -6 420.432 25.8993   2
 -12   6   6 388.920 29.0447   1
   6 -12   6 383.145 27.3411   3
   6   6  -6 351.468 27.7384   2
   6   6   6 412.530 22.6928   3
 -12   6  -6 379.388 29.1154   1
 -12   6   6 379.095 30.6092   3
   6 -12  -6 381.156 29.7039   2
   6   6   6 330.438 24.1853   2
  12  -6  -6 360.537 25.5697   2
  -6  12   6 369.623 24.2057   2
  -6  -6   6 340.837 29.6075   1
  -6  12  -6 395.463 23.4832   2
  -6  -6  -6 386.468 27.5673   2
  12  -6   6 352.811 24.6210   3
  -6  12   6 335.241 29.0755   3
  -6  -6   6 413.001 25.2576   3
   3   9   6 113.397 16.5789   3
   3 -12  -6 127.413 16.4968   2
   3   9   6 73.0565 13.3669   2
   9 -12   6 76.4503 15.5799   3
   9   3  -6 80.3319 15.8722   2
 -12   9  -6 86.9738 18.8799   1
 -12   9  -6 90.3073 15.8161   2
 -12   3   6 95.6146 18.5331   1
  -9  -3   6 87.1298 18.6494   1
  12  -9   6 95.7514 15.7812   3
  -9  12  -6 74.4012 19.1518   1
  12  -3  -6 102.160 16.5143   2
  -9  12  -6 65.9411 13.0923   2
  -3  -9  -6 88.2397 13.3311   2
  -3  12   6 100.954 18.1796   3
  -3  12   6 81.1652 13.6388   2
  -9  -3   6 77.3363 14.4346   3
 -12  12  -6 41.1425 12.7487   2
 -12   0   6 61.2945 17.6058   3
 -12   0   6 59.0290 18.3683   1
  12   0  -6 51.2220 16.0250   2
   0  12   6 86.7570 16.3017   3
 -12  12  -6 50.8446 19.0270   1
  12 -12   6 34.0874 14.6096   3
 -13   2  -6 -12.327 14.4935   1
 -13  11   6 -7.4834 16.2597   3
   2  11  -6 -2.7785 11.0608   2
 -13   2  -6 4.20613 12.5865   2
   2 -13   6 12.6366 13.6075   3
 -13  11   6 32.3345 15.1221   1
  -2 -11   6 41.8295 21.7694   3
 -11  13   6 -0.4916 16.6122   3
  -2 -11   6 7.89300 15.6411   1
  13  -2   6 25.7871 10.8156   3
  -2  13  -6 1.83625 10.7848   2
  13 -11  -6 -0.6318 12.7483   2
 -11  -2  -6 6.59041 12.4292   2
 -11  13   6 32.1909 13.4699   1
   5   8  -6 51.8774 13.7910   2
 -13   8   6 19.4111 17.2771   3
   8 -13  -6 37.1256 11.2950   2
   5 -13   6 41.9507 14.6474   3
 -13   5  -6 42.2964 13.2028   2
 -13   5  -6 37.5055 15.8671   1
  -8  13   6 28.6010 11.9069   2
  -5  13  -6 40.3936 11.9605   2
  13  -8  -6 24.1629 12.5851   2
  -8  13   6 39.6885 17.2259   3
  -5  -8   6 34.1185 16.4750   1
  -5  -8   6 50.0897 13.1545   3
  -8  -5  -6 52.6662 13.2463   2
  13  -5   6 34.0747 12.2318   3
   8 -13   6 4.09932 12.9027   3
 -13   8  -6 -12.101 14.9090   1
 -13   5   6 9.07333 15.7303   3
   5   8   6 3.94257 11.8342   2
   8   5  -6 5.96137 13.5221   2
 -13   8  -6 6.56087 11.8047   2
   5 -13  -6 7.86192 10.0463   2
 -13   5   6 6.69970 14.6066   1
  -8  13  -6 13.4945 10.9208   2
  13  -5  -6 -2.0992 13.6509   2
  -5  -8  -6 11.5993 8.74448   2
  -8  -5   6 20.2727 12.2282   3
  -5  13   6 5.91323 10.8730   2
  -5  13   6 -0.9684 15.4341   3
  -8  13  -6 9.57624 16.0751   1
  -8  -5   6 1.10417 14.9562   1
 -13   2   6 262.150 26.3036   3
 -13  11  -6 258.080 21.8520   2
  11 -13   6 229.137 23.5955   3
  11   2  -6 209.656 25.4323   2
 -13  11  -6 236.545 28.9960   1
   2  11   6 251.131 21.4588   3
 -13   2   6 230.302 27.9287   1
 -11  13  -6 212.523 29.8097   1
  -2  13   6 271.697 25.7567   3
 -11  -2   6 207.874 28.9259   1
  13 -11   6 228.254 23.1063   3
  13  -2  -6 259.368 25.0392   2
 -11  -2   6 239.615 22.8043   3
 -11  13  -6 273.696 21.2117   2
 -14  13   6 15.5637 18.9395   3
 -14   1  -6 39.9078 14.6080   2
   1 -14   6 33.9262 14.4519   3
   1  13  -6 45.1477 13.4358   2
 -14   1  -6 10.9146 14.4561   1
  -1  14  -6 52.1107 12.5116   2
 -13  14   6 69.1764 16.4057   1
  -1 -13   6 82.3445 16.0032   3
 -13  14   6 30.9722 19.3129   3
  -1 -13   6 30.2679 17.2275   1
  14  -1   6 27.0328 11.3187   3
 -14  10   6 46.9881 16.9838   1
   4 -14   6 30.8599 14.5042   3
 -14   4  -6 16.4496 15.8853   1
 -14  10   6 19.8247 17.8949   3
   4  10  -6 33.0485 13.0001   2
 -14   4  -6 15.6411 12.7560   2
 -10  -4  -6 15.5775 13.1905   2
  -4 -10   6 29.8374 12.8806   3
  14  -4   6 24.4381 11.9526   3
  -4 -10   6 38.8243 18.4783   1
 -10  14   6 13.5677 17.6546   3
  -4  14  -6 17.5018 11.1596   2
  14 -10  -6 42.1148 13.6715   2
 -14   7   6 249.193 28.0326   1
   7   7  -6 265.402 23.7497   2
 -14   7  -6 271.953 23.7547   2
 -14   7  -6 288.936 28.5454   1
   7 -14   6 241.198 24.5906   3
 -14   7   6 259.665 28.9357   3
  -7  14   6 219.101 27.2329   3
  14  -7  -6 256.245 23.6698   2
  -7  14  -6 277.958 20.4913   2
  -7  -7   6 218.333 27.6382   1
  -7  -7   6 271.544 22.6037   3
  14  -7   6 262.059 22.6542   3
  -7  14  -6 275.660 30.3468   1
 -14  10  -6 19.0690 12.5072   2
 -14  10  -6 21.4095 17.5617   1
 -14   4   6 34.3192 16.9943   3
  10 -14   6 18.9317 14.5457   3
 -14   4   6 27.0281 17.2353   1
  10   4  -6 26.4651 15.2022   2
 -10  14  -6 14.4953 18.4072   1
 -10  -4   6 43.6956 17.5194   1
  14  -4  -6 45.6203 15.7572   2
  14 -10   6 27.9937 13.6063   3
  -4  14   6 24.9838 16.8604   3
 -10  -4   6 38.1306 12.5360   3
 -10  14  -6 -2.7337 10.9882   2
   1  13   6 69.4775 15.0919   3
  13 -14   6 67.8472 16.2815   3
  13   1  -6 63.2628 17.5912   2
 -14   1   6 76.1471 16.4424   3
 -14  13  -6 58.6310 14.0741   2
 -14   1   6 48.6730 18.8858   1
 -14  13  -6 66.8159 20.5237   1
  14  -1  -6 35.8375 20.1362   2
  -1  14   6 70.9322 16.5372   3
 -13  14  -6 51.7611 20.1505   1
  14 -13   6 71.4090 16.3187   3
 -13  14  -6 56.5622 14.0254   2
 -13  -1   6 71.9405 16.0923   3
 -13  -1   6 70.0972 20.1786   1
   0 -15   6 305.843 24.9651   3
 -15   0  -6 270.999 26.2589   1
 -15  15   6 281.112 32.1827   3
   3 -15   6 19.0881 13.9309   3
 -15   3  -6 7.74168 12.9902   2
   3  12  -6 12.4490 12.2902   2
 -15   3  -6 -11.263 16.5354   1
 -15  12   6 8.47026 18.4748   3
  -3 -12   6 22.9467 13.3636   3
 -12  -3  -6 7.38215 16.1459   2
  -3  15  -6 0.97802 11.3625   2
 -12  15   6 -1.1281 18.0734   3
  -3 -12   6 31.2534 17.5600   1
   6   9  -6 27.4942 13.9869   2
 -15   6  -6 10.1081 16.8297   1
   6 -15   6 33.2322 15.3305   3
 -15   9   6 21.9648 18.1186   3
 -15   6  -6 23.1726 12.9789   2
 -15   9   6 35.0465 17.2011   1
  -6  -9   6 43.8609 12.8792   3
  -6  15  -6 10.7727 11.7063   2
  -6  -9   6 19.5159 17.2870   1
  15  -6   6 34.4695 13.2261   3
  -9  15   6 28.4910 18.1076   3
  15  -9  -6 16.3967 13.9542   2
 -15   9  -6 5.86356 17.4269   1
 -15   6   6 36.2088 17.8276   1
 -15   9  -6 10.5250 13.0362   2
   9   6  -6 11.4100 14.8906   2
 -15   6   6 28.4422 17.6031   3
   9 -15   6 38.4614 15.7974   3
  -6  15   6 24.9387 17.7891   3
  -9  15  -6 32.7879 19.5340   1
  -9  -6   6 11.8509 16.5603   1
  15  -6  -6 48.0922 15.9560   2
  -9  15  -6 26.6693 12.0676   2
  15  -9   6 8.62323 12.5646   3
  -9  -6   6 33.9966 12.4551   3
 -15   3   6 46.7499 17.4378   3
 -15  12  -6 4.80344 18.0743   1
  12 -15   6 10.9233 14.1036   3
  12   3  -6 26.0171 16.4423   2
 -15  12  -6 11.8926 12.8773   2
 -15   3   6 29.5120 17.8175   1
 -12  15  -6 29.5192 11.9769   2
 -12  -3   6 20.4560 17.9843   1
  -3  15   6 41.0212 17.9493   3
  15 -12   6 24.3437 13.5963   3
  15  -3  -6 15.1016 15.8507   2
 -12  -3   6 44.6748 14.7623   3
 -12  15  -6 14.2515 19.0193   1
 -15  15  -6 213.846 22.8568   2
  15   0  -6 235.429 28.7114   2
 -15   0   6 269.356 31.5979   1
   0  15   6 285.143 23.9416   3
 -15   0   6 292.821 25.1287   3
 -16  14   6 4.14794 19.8604   3
   2 -16   6 2.20358 13.7578   3
 -16   2  -6 -1.8877 15.9083   1
 -16  14   6 47.0870 15.8128   1
 -16   2  -6 45.8633 33.5659   2
   2  14  -6 25.1216 15.4255   2
  -2 -14   6 37.6409 14.2464   3
  -2 -14   6 101.465 21.5813   1
 -14  16   6 18.9632 19.3537   3
   5  11  -6 27.5328 13.8268   2
 -16  11   6 64.5164 18.8969   1
 -16   5  -6 30.5111 18.8918   1
   5 -16   6 35.0599 15.7188   3
 -16  11   6 37.7110 20.1590   3
 -16   5  -6 36.5227 14.0202   2
 -11  16   6 34.4142 19.6625   3
  -5 -11   6 43.0707 18.5092   1
  -5 -11   6 60.4159 14.1887   3
 -16   8  -6 82.1818 16.1825   2
 -16   8   6 99.3193 21.8644   3
   8   8  -6 77.2381 17.1925   2
 -16   8  -6 87.7893 21.5998   1
 -16   8   6 132.641 22.2946   1
   8 -16   6 87.1371 18.3769   3
  -8  16  -6 77.5037 22.1266   1
  16  -8  -6 108.923 20.9724   2
  -8  -8   6 142.672 18.5717   3
  -8  -8   6 104.604 21.2217   1
  -8  16  -6 93.7297 13.8836   2
  -8  16   6 83.0130 20.6129   3
 -16   5   6 411.588 35.0841   1
  11   5  -6 484.309 31.4638   2
 -16   5   6 467.713 34.0945   3
  11 -16   6 366.694 30.0641   3
 -16  11  -6 435.678 28.6575   2
  -5  16   6 401.518 32.9945   3
 -11  -5   6 429.819 36.0070   1
 -11  -5   6 434.269 26.7565   3
 -11  16  -6 417.319 25.7401   2
 -11  16  -6 439.517 37.9997   1
  16  -5  -6 480.009 32.5934   2
 -16  14  -6 9.62200 20.2266   1
 -16  14  -6 32.2023 13.6510   2
 -16   2   6 73.3420 17.0731   3
  14   2  -6 49.8020 18.0249   2
 -16   2   6 68.7760 19.9298   1
 -14  -2   6 129.736 19.1367   3
 -14  16  -6 33.3383 21.0059   1
  -2  16   6 65.4744 17.1987   3
 -14  -2   6 73.9279 21.4388   1
  16  -2  -6 19.5651 16.8359   2
 -17   4  -6 136.352 22.3977   1
 -17   4  -6 198.527 24.1280   2
   4 -17   6 161.445 23.7560   3
   4  13  -6 169.194 21.2662   2
 -17  13   6 231.439 26.9029   1
 -17  13   6 175.177 25.8752   3
 -13  17   6 145.628 24.4059   3
  -4 -13   6 119.193 23.2589   1
  -4 -13   6 205.739 20.5226   3
   7  10  -6 62.6527 15.8374   2
 -17  10   6 80.3751 21.3176   3
   7 -17   6 70.4927 17.7275   3
 -17   7  -6 86.5966 16.6564   2
 -17  10   6 112.987 21.8710   1
 -17   7  -6 67.2218 20.4502   1
  -7  17  -6 70.6702 13.5861   2
  -7 -10   6 129.434 25.7172   3
 -10  17   6 69.4193 21.6289   3
 -17   7   6 90.6619 21.0579   1
 -17  10  -6 76.0675 15.8272   2
 -17  10  -6 59.0932 21.3080   1
  10   7  -6 70.8085 17.4621   2
 -10  17  -6 79.5079 15.7350   2
  -7  17   6 105.940 21.4887   3
 -10  17  -6 97.9802 28.3552   1
  17  -7  -6 102.476 19.5633   2
 -10  -7   6 108.781 25.4459   1
 -17  13  -6 17.4550 20.0811   1
  13   4  -6 5.84179 16.6286   2
 -17   4   6 61.2555 17.5970   3
 -17  13  -6 41.3876 14.2337   2
 -13  17  -6 38.5196 22.3681   1
 -13  17  -6 50.3752 13.3734   2
  17  -4  -6 7.96973 16.4641   2
  -4  17   6 38.4797 17.5157   3
 -13  -4   6 35.9314 19.0020   1
 -18   9   6 246.523 42.2717   1
 -18   9  -6 278.198 24.8675   2
 -18   9  -6 205.096 32.0653   1
  -9  18  -6 224.358 33.7183   1
  -9  18   6 225.996 33.8357   3
  -9  -9   6 251.809 30.8278   1
   1   0   7 339.845 25.2031   3
   0   1  -7 334.190 23.8729   2
  -1   1   7 322.116 23.2166   1
  -1   0  -7 357.232 23.3129   2
   0  -1   7 310.406 24.7717   3
   0  -1   7 344.726 24.2106   1
  -1   1   7 301.056 25.2598   3
   1  -1  -7 331.171 24.7548   2
  -2   2  -7 288.736 22.0909   2
  -2   0   7 301.829 23.8691   1
   0  -2  -7 323.868 21.3800   1
   2   0  -7 282.795 22.3651   2
  -2   0   7 297.862 24.8069   3
   0  -2  -7 272.641 22.2461   2
   0   2   7 304.089 24.7862   3
   2  -2   7 266.280 23.9699   3
   1  -3   7 141.262 18.0453   3
  -3   2   7 134.283 19.0874   1
  -3   1  -7 132.037 16.0314   2
   2   1   7 133.679 19.5933   3
   2  -3  -7 127.902 15.9531   2
   1  -3   7 146.493 20.3391   1
   1   2  -7 137.902 16.1294   2
  -3   2   7 111.228 18.1271   3
  -2  -1  -7 161.133 18.4698   2
  -1  -2   7 120.849 17.0106   3
  -1  -2   7 130.837 20.5213   1
   3  -2  -7 93.1333 24.2783   2
  -2   3   7 123.655 17.7664   1
   3  -1   7 142.214 20.1375   3
  -2  -1  -7 182.783 16.9719   1
  -1   3  -7 156.273 19.6912   2
  -2   3   7 136.492 18.5354   3
  -4   0  -7 278.948 23.0574   2
   4   0   7 317.704 23.8839   3
   0   4  -7 316.078 22.6450   2
   0  -4   7 290.433 24.5532   3
   0  -4   7 301.043 25.3306   1
   4  -4  -7 291.754 22.5555   2
  -4   4   7 310.002 26.4455   3
  -4   0  -7 313.693 22.8066   1
  -4   4   7 320.842 21.7827   1
   1   3   7 21.9822 13.5422   3
   3  -4   7 -4.8049 11.6118   3
  -4   1   7 1.84035 12.1821   1
  -4   1   7 13.7872 13.8024   3
   3   1  -7 19.3238 12.4829   2
  -4   3  -7 8.51420 12.0426   2
   1  -4  -7 14.4576 11.4075   2
  -3  -1   7 2.24115 13.5237   3
   4  -1  -7 14.7274 12.3107   2
   4  -3   7 5.81861 12.2291   3
  -3  -1   7 15.2232 13.6163   1
  -1  -3  -7 17.4357 11.8411   2
  -1   4   7 2.05024 13.4676   3
  -3   4  -7 5.82121 11.5606   2
   2  -5   7 110.565 16.5976   3
  -5   2  -7 124.160 19.8200   1
  -5   3   7 151.267 19.9056   3
   3  -5  -7 154.769 16.9435   2
  -5   2  -7 123.034 15.7322   2
  -5   3   7 127.277 18.6195   1
   3   2   7 152.540 19.9533   3
   2   3  -7 150.456 19.1312   2
  -2  -3   7 149.133 21.3979   3
   5  -2   7 110.649 16.4375   3
  -3   5   7 135.098 19.0841   3
  -3  -2  -7 163.228 17.3990   2
   5  -3  -7 151.037 17.3738   2
  -2   5  -7 137.241 16.2901   2
  -2  -3   7 144.848 18.8944   1
  -5   0   7 285.108 23.9598   1
   0  -5  -7 256.125 21.7881   2
  -5   0   7 297.151 25.2357   3
   5   0  -7 278.480 23.1101   2
   0   5   7 280.117 24.3955   3
  -5   5  -7 295.676 22.3587   2
   5  -5   7 265.273 22.3825   3
  -6   5   7 586.223 30.9282   1
   1  -6   7 555.981 34.2534   1
  -6   1  -7 577.735 30.8422   2
   5   1   7 564.734 31.2588   3
   1   5  -7 583.253 30.2424   2
   1  -6   7 547.348 32.9030   3
  -6   1  -7 625.191 31.8035   1
   5  -6  -7 607.261 30.8662   2
  -1   6  -7 548.721 29.8027   2
  -5   6   7 574.144 28.8463   1
  -5  -1  -7 578.019 30.8818   2
   6  -1   7 544.185 30.6901   3
   6  -5  -7 579.407 30.9096   2
  -1  -5   7 525.129 34.0670   1
  -5   6   7 578.123 38.0555   3
  -1  -5   7 525.276 31.9992   3
   4  -6   7 76.2206 16.6684   3
   2   4   7 104.334 16.1496   3
  -6   2   7 82.7122 15.8362   1
  -6   4  -7 85.0044 16.1424   1
  -6   4  -7 90.4692 14.9276   2
  -6   2   7 82.6746 17.2794   3
   2  -6  -7 64.6708 13.3707   2
   4   2  -7 81.9277 14.4443   2
  -2   6   7 74.1491 17.0872   3
   6  -4   7 73.6016 14.4866   3
  -4   6  -7 104.227 14.7297   2
  -4  -2   7 92.1984 16.4472   3
  -2  -4  -7 92.3389 14.4041   2
  -4  -2   7 80.5595 16.3499   1
   6  -2  -7 46.8879 13.9019   2
   0  -7   7 103.187 16.2259   3
   7   0   7 126.617 17.5642   3
  -7   0  -7 120.117 16.7469   2
  -7   7   7 120.474 17.5638   1
   0  -7   7 106.824 18.9343   1
   0   7  -7 79.2355 14.8383   2
  -7   7   7 112.876 19.2594   3
   7  -7  -7 106.938 15.4962   2
   3   4  -7 409.959 26.3867   2
   4   3   7 443.540 26.6747   3
  -7   3  -7 423.864 26.7982   2
  -7   3  -7 420.618 28.5053   1
  -7   4   7 446.849 32.7926   3
  -7   4   7 455.945 27.8792   1
   4  -7  -7 395.308 25.8745   2
   3  -7   7 387.488 27.8262   3
  -3  -4   7 411.369 28.1419   3
  -4   7   7 412.940 30.6852   3
  -4  -3  -7 418.265 26.2462   2
   7  -3   7 445.943 26.9727   3
   7  -4  -7 384.844 27.6755   2
  -3   7  -7 423.933 26.0185   2
  -3  -4   7 421.274 30.5872   1
  -7   6  -7 99.4463 14.7098   2
   6   1  -7 79.7755 15.2062   2
   1  -7  -7 95.8449 14.3327   2
   6  -7   7 99.9042 15.7474   3
   1   6   7 106.886 16.6391   3
  -7   1   7 87.7927 16.7336   1
  -7   6  -7 102.833 18.1104   1
  -6   7  -7 78.8697 13.9855   2
  -6  -1   7 87.9077 20.8574   3
  -1   7   7 79.6084 13.9818   2
   7  -6   7 107.691 17.2771   3
  -1   7   7 68.2049 16.4631   3
  -1  -6  -7 87.9317 14.2974   2
  -6  -1   7 87.5761 16.9982   1
   7  -1  -7 73.1938 15.7588   2
  -8   6   7 57.3292 14.0790   1
   6  -8  -7 36.1016 12.9716   2
   2  -8   7 75.0072 17.8166   1
  -8   2  -7 49.2657 13.9081   2
  -8   6   7 21.7992 16.2784   3
   2   6  -7 36.4235 13.4019   2
   2  -8   7 42.8796 14.1776   3
  -8   2  -7 51.8710 14.3523   1
   6   2   7 46.9947 12.7492   3
   8  -6  -7 32.4774 13.1879   2
   8  -2   7 58.6327 13.4078   3
  -2  -6   7 36.1427 22.5237   3
  -6  -2  -7 54.8433 13.9775   2
  -2  -6   7 52.7737 16.5333   1
  -6   8   7 34.3525 16.2553   3
  -8   3   7 250.372 24.0725   1
   3  -8  -7 244.036 21.2147   2
  -8   5  -7 202.560 24.6734   1
   5   3  -7 281.151 23.2294   2
  -8   5  -7 294.577 22.2666   2
   3   5   7 251.398 21.7107   3
  -8   3   7 252.539 26.4280   3
   5  -8   7 212.512 22.0794   3
   8  -3  -7 276.725 23.3478   2
  -5  -3   7 276.233 29.6995   3
  -5   8  -7 212.675 21.1580   2
  -3   8   7 251.731 29.0968   3
  -3   8   7 258.078 20.9396   2
  -3  -5  -7 267.719 21.8150   2
  -5  -3   7 221.655 29.7099   1
   0   8   7 215.725 23.5198   3
  -8   8  -7 229.656 23.3985   2
  -8   0   7 226.359 24.1884   3
   8   0  -7 207.499 22.4449   2
  -8   8  -7 204.583 26.4896   1
   8  -8   7 185.192 22.0923   3
  -8   0   7 195.683 24.6179   1
   0   8   7 179.028 19.6585   2
  -9   1  -7 59.5383 15.1678   1
   8  -9  -7 96.3307 15.0008   2
   1   8  -7 60.4101 14.1595   2
   1  -9   7 70.5589 17.9145   1
   1  -9   7 79.3978 16.1766   3
  -9   8   7 113.914 18.8114   1
  -9   8   7 83.0818 18.9567   3
   8   1   7 77.2811 13.7576   3
  -9   1  -7 90.5668 14.7976   2
  -1  -8   7 65.2862 14.5944   3
  -8  -1  -7 76.0762 17.1770   2
  -8   9   7 72.3798 18.5157   3
  -8   9   7 103.431 16.6308   1
   9  -1   7 83.4986 14.2620   3
  -1  -8   7 75.7394 18.3038   1
  -1   9  -7 63.7023 13.8672   2
   9  -8  -7 76.8164 14.5690   2
  -9   4  -7 2.59964 12.0651   2
  -9   5   7 15.4753 16.0748   3
   5   4   7 15.6396 11.6819   3
  -9   5   7 0.71240 12.7227   1
   4   5  -7 7.67938 12.9157   2
   5  -9  -7 14.9421 12.7078   2
   4  -9   7 1.42347 12.4943   3
  -9   4  -7 10.1158 13.7024   1
  -4  -5   7 15.1381 15.1456   1
  -5   9   7 -1.5953 14.5951   3
  -4  -5   7 14.8308 16.6415   3
  -5  -4  -7 5.04385 12.0702   2
  -4   9  -7 7.66675 11.4157   2
  -5   9   7 -4.1327 11.3784   2
   9  -5  -7 7.14181 16.0998   2
   9  -4   7 11.9563 18.8502   3
   2  -9  -7 22.5337 11.9936   2
   2   7   7 57.3724 14.1542   3
  -9   2   7 31.0442 16.1140   3
   2   7   7 27.4481 18.4111   2
  -9   2   7 44.6967 16.0457   1
   7   2  -7 42.3191 14.4184   2
  -9   7  -7 36.9243 12.8115   2
   7  -9   7 44.5541 14.6265   3
  -9   7  -7 36.8406 17.3991   1
   9  -7   7 34.5127 13.5956   3
  -7   9  -7 43.1059 13.3073   2
  -7  -2   7 33.8930 14.6355   3
  -2  -7  -7 37.5392 14.7803   2
   9  -2  -7 28.9909 14.0255   2
  -7  -2   7 43.2893 16.0525   1
  -2   9   7 31.6246 27.5180   3
  -7   9  -7 53.7656 16.9009   1
  -2   9   7 38.5709 12.2072   2
   0 -10   7 70.7423 15.6207   3
   0 -10   7 43.0988 17.5674   1
  10   0   7 88.9148 14.3287   3
 -10   0  -7 89.9905 16.5136   2
   0  10  -7 63.2129 14.0801   2
  10 -10  -7 81.9382 14.6524   2
 -10  10   7 121.270 18.3466   1
 -10  10   7 87.2727 19.5809   3
   7 -10  -7 291.237 36.8730   2
 -10   7   7 311.745 25.0336   1
   7   3   7 334.144 22.1015   3
 -10   3  -7 304.718 25.8524   1
   3   7  -7 321.165 23.8781   2
 -10   3  -7 281.875 24.0532   2
   3 -10   7 289.397 25.1281   3
 -10   7   7 286.336 28.3044   3
  -3  -7   7 326.057 29.7693   1
  10  -7  -7 305.795 24.7640   2
  -7  10   7 274.351 22.9343   2
  -3  10  -7 295.753 22.9236   2
  -3  -7   7 320.004 25.0131   3
  -7  10   7 313.285 28.7499   3
  10  -3   7 305.526 25.1796   3
  -7  -3  -7 328.063 24.7131   2
 -10   6  -7 165.217 20.2856   2
 -10   4   7 134.418 20.5060   3
 -10   6  -7 131.753 19.4234   1
   4   6   7 140.500 18.4239   3
   6 -10   7 141.289 21.3873   3
  -6  10  -7 140.378 18.7595   2
  -4  10   7 133.534 19.9601   3
  -6  -4   7 150.779 24.2430   1
  -6  -4   7 145.936 20.8377   3
  10  -4  -7 157.553 18.7854   2
  -4  -6  -7 154.945 19.7985   2
  10  -6   7 141.286 19.9345   3
  -4  10   7 129.296 18.1667   2
 -10   9  -7 29.6242 13.0740   2
   9   1  -7 49.1232 15.0724   2
   1   9   7 57.7039 14.3567   3
   9 -10   7 44.9187 14.9530   3
 -10   9  -7 29.7422 17.5583   1
 -10   1   7 32.9312 15.3824   3
   1 -10  -7 35.3646 11.9563   2
 -10   1   7 35.2809 15.9831   1
  -1  -9  -7 15.0786 9.70511   2
  -9  10  -7 28.0571 12.9562   2
  -9  10  -7 9.95228 16.7267   1
  10  -9   7 29.6993 14.3834   3
  -9  -1   7 62.7912 17.6585   1
  10  -1  -7 63.6485 15.4260   2
  -9  -1   7 42.6821 15.6843   3
   9 -11  -7 35.0126 12.7097   2
 -11   2  -7 27.7438 13.9214   2
   9   2   7 17.4909 10.6232   3
 -11   2  -7 -1.8433 14.1997   1
   2   9  -7 17.0940 12.7692   2
   2 -11   7 29.7711 14.1105   3
 -11   9   7 8.31942 17.1402   3
 -11   9   7 25.5592 13.5100   1
  -9  -2  -7 15.4974 13.2339   2
  -9  11   7 19.4770 17.8082   3
  11  -9  -7 37.8189 13.0708   2
  -2  -9   7 15.5958 16.3247   1
  11  -2   7 10.4258 11.3455   3
  -2  11  -7 11.9193 12.6087   2
  -2  -9   7 20.0047 13.3014   3
 -11   6   7 278.754 27.7140   3
   6   5   7 287.498 20.5703   3
 -11   5  -7 263.120 26.8881   1
   5 -11   7 208.656 24.0065   3
   5   6  -7 288.000 23.7608   2
 -11   5  -7 247.445 22.9439   2
 -11   6   7 273.956 36.1878   1
  11  -5   7 244.547 22.8897   3
  -6  11   7 225.949 27.1635   3
  -5  -6   7 253.709 28.3856   1
  -5  -6   7 238.935 23.6742   3
  -5  11  -7 257.931 22.2852   2
  -6  -5  -7 305.969 23.2986   2
 -11   3   7 143.139 24.0491   1
   3 -11  -7 138.760 22.1080   2
 -11   8  -7 96.2951 15.5632   2
   8 -11   7 110.242 18.5648   3
 -11   8  -7 125.922 20.4665   1
   8   3  -7 113.289 17.4858   2
 -11   3   7 123.810 20.4228   3
   3   8   7 144.779 18.9682   3
  11  -3  -7 109.769 17.5149   2
  -3  -8  -7 140.458 18.4785   2
  -8  11  -7 124.263 16.0020   2
  -8  -3   7 114.097 17.4551   3
  -8  -3   7 98.4746 19.4459   1
  -8  11  -7 113.596 21.2737   1
  11  -8   7 122.785 17.9763   3
  -3  11   7 127.368 19.7642   3
 -11  11  -7 215.758 22.1277   2
 -11   0   7 235.065 25.8339   3
   0  11   7 247.859 27.9579   3
  11   0  -7 232.026 30.5498   2
 -11   0   7 201.919 27.2531   1
  11 -11   7 175.540 23.3364   3
 -11  11  -7 226.553 29.5229   1
 -12   1  -7 75.6088 17.5006   1
 -12   1  -7 93.2749 16.5173   2
   1 -12   7 95.8434 21.0068   1
 -12  11   7 151.794 21.4267   1
  11   1   7 115.067 16.8886   3
 -12  11   7 96.8190 22.0013   3
   1  11  -7 82.7666 15.5853   2
   1 -12   7 86.4714 17.3332   3
  -1 -11   7 113.575 18.4921   3
 -11  -1  -7 118.987 18.1301   2
 -11  12   7 72.1313 20.5472   3
  12  -1   7 103.750 14.9439   3
  -1 -11   7 95.3458 20.3556   1
 -12   4  -7 36.9793 14.4215   2
 -12   8   7 57.2111 15.8858   1
   4 -12   7 26.8598 15.0046   3
 -12   4  -7 23.4357 16.1615   1
   4   8  -7 50.6582 14.9660   2
 -12   8   7 53.6628 18.9213   3
   8   4   7 44.1880 11.6922   3
  12  -8  -7 44.3745 14.6166   2
  -8  12   7 36.2662 17.9963   3
  -4  -8   7 22.9622 17.1783   1
  -8  -4  -7 40.2788 14.5043   2
  12  -4   7 35.5311 13.6226   3
  -4  12  -7 33.4147 13.0344   2
  -4  -8   7 40.6322 13.7853   3
   5   7   7 49.2148 11.8896   3
   7 -12   7 17.3731 14.7539   3
 -12   7  -7 32.4587 17.2437   1
 -12   7  -7 28.1156 13.4321   2
 -12   5   7 33.4777 15.8310   1
   7   5  -7 52.7828 15.6058   2
 -12   5   7 28.2038 17.4906   3
  -7  12  -7 33.1876 13.2018   2
  -7  -5   7 40.4956 17.4281   1
  -5  -7  -7 38.9829 16.3228   2
  12  -5  -7 26.2191 14.4504   2
  12  -7   7 26.1016 14.0546   3
  -5  12   7 16.7864 17.1901   3
  -7  12  -7 36.4972 18.6272   1
  -7  -5   7 49.4137 14.7007   3
 -12   2   7 45.1505 17.7906   3
 -12  10  -7 18.9404 13.0723   2
 -12   2   7 17.5570 16.8333   1
  10 -12   7 17.2722 14.1153   3
   2  10   7 55.1442 13.8490   3
 -12  10  -7 11.1498 17.0842   1
 -10  12  -7 16.4322 12.5714   2
  12 -10   7 26.2395 14.2741   3
  12  -2  -7 34.9441 15.7085   2
 -10  -2   7 24.0012 17.3414   1
 -10  -2   7 45.2780 14.7282   3
  -2  12   7 38.6563 16.8154   3
 -10  12  -7 36.7096 19.2372   1
   0 -13   7 152.139 22.4006   3
   0 -13   7 102.601 29.5126   1
   0  13  -7 122.861 16.9799   2
 -13  13   7 117.450 37.5966   3
  13   0   7 121.310 17.1147   3
 -13   0  -7 139.522 18.9125   2
 -13   3  -7 78.8598 16.2693   2
 -13   3  -7 45.1286 17.5702   1
 -13  10   7 83.1323 21.2429   3
   3 -13   7 83.3798 17.3637   3
 -13  10   7 145.206 22.5831   1
   3  10  -7 75.6466 15.6901   2
  -3  13  -7 60.9528 14.4249   2
  -3 -10   7 68.4693 20.2980   1
  -3 -10   7 88.2913 15.8961   3
  13  -3   7 87.0551 14.8281   3
 -10  -3  -7 85.3523 16.4066   2
 -10  13   7 56.9981 19.9576   3
 -13   7   7 186.531 27.7557   3
   6 -13   7 222.748 24.9037   3
 -13   7   7 195.459 25.7072   1
   7   6   7 230.987 18.6310   3
 -13   6  -7 187.721 27.5315   1
   6   7  -7 214.663 23.4457   2
  13  -6   7 201.098 21.8634   3
  -6  -7   7 228.223 23.2873   3
  -6  -7   7 170.670 27.8019   1
  -7  13   7 185.137 27.3528   3
  13  -7  -7 204.042 25.6009   2
  -6  13  -7 221.050 21.1944   2
 -13   4   7 298.808 29.7158   3
   4   9   7 297.359 21.8732   3
 -13   4   7 291.334 28.5935   1
   9   4  -7 267.395 26.0360   2
 -13   9  -7 278.336 24.7983   2
 -13   9  -7 253.984 30.4898   1
   9 -13   7 225.216 25.5707   3
  -9  13  -7 250.359 31.6328   1
  -4  13   7 272.403 28.4112   3
  -9  13  -7 274.234 22.8658   2
  13  -9   7 270.683 24.4779   3
  -9  -4   7 266.269 30.0830   1
  13  -4  -7 281.454 26.4229   2
  -9  -4   7 258.907 24.6699   3
  12   1  -7 77.6496 18.6724   2
 -13  12  -7 51.9267 14.6061   2
 -13   1   7 66.4725 19.6610   1
 -13  12  -7 41.7361 19.4815   1
   1  12   7 87.0392 16.4647   3
  12 -13   7 51.4054 16.6235   3
 -13   1   7 79.9463 17.2075   3
  -1  13   7 68.7869 16.7671   3
 -12  -1   7 79.0657 16.5341   3
 -12  13  -7 57.5334 14.4476   2
  13 -12   7 57.1316 16.8103   3
 -12  -1   7 59.8080 19.3568   1
  13  -1  -7 47.9301 17.3867   2
 -12  13  -7 53.3292 20.3043   1
 -14  12   7 119.020 24.7762   3
 -14   2  -7 118.945 18.0831   2
   2  12  -7 108.152 19.1608   2
   2 -14   7 81.1158 17.8684   3
  -2  14  -7 95.2114 18.8291   2
  14  -2   7 88.0590 14.1476   3
 -12  14   7 97.3110 36.7509   3
  -2 -12   7 80.4930 24.6346   1
  -2 -12   7 141.054 18.8796   3
 -14   9   7 182.857 25.1685   1
   5   9  -7 122.562 17.6104   2
   5 -14   7 140.212 19.9452   3
 -14   9   7 126.262 23.0241   3
 -14   5  -7 124.852 28.1363   2
 -14   5  -7 151.115 22.4278   1
  -5  -9   7 167.937 21.4678   3
  14  -9  -7 158.086 24.5429   2
  -9  14   7 155.652 24.3364   3
  14  -5   7 166.279 20.5439   3
  -5  -9   7 125.521 22.6212   1
  -5  14  -7 154.020 17.3633   2
 -14   8  -7 55.6605 19.8497   1
   8 -14   7 54.9386 16.9869   3
 -14   6   7 93.1614 20.3766   3
   8   6  -7 91.1585 17.8636   2
 -14   8  -7 83.2834 16.2037   2
 -14   6   7 100.187 19.7716   1
  -8  14  -7 73.7646 21.0977   1
  -6  14   7 76.6399 20.6308   3
  -8  -6   7 91.6249 16.3221   3
  -8  14  -7 76.1007 14.9037   2
  14  -6  -7 101.456 17.7686   2
  14  -8   7 73.2435 15.9461   3
  -8  -6   7 69.5738 20.0538   1
 -14   3   7 43.2151 17.7719   1
  11   3  -7 49.6665 17.3620   2
  11 -14   7 25.1861 26.8133   3
 -14  11  -7 22.0771 13.7607   2
 -14   3   7 51.6640 17.8013   3
 -14  11  -7 34.7241 19.7430   1
   3  11   7 66.4719 12.9435   3
  -3  14   7 71.4245 18.3970   3
 -11  14  -7 41.3670 13.7024   2
  14 -11   7 72.1987 16.5096   3
  14  -3  -7 49.0797 16.9996   2
 -11  -3   7 42.4264 23.1623   1
 -11  14  -7 17.7780 20.4089   1
 -14   0   7 8.87763 17.3758   1
 -14  14  -7 20.6225 20.0342   1
  14   0  -7 2.07901 16.4992   2
  14 -14   7 3.57427 14.3206   3
 -14  14  -7 -13.119 12.7775   2
 -15  11   7 100.389 23.1740   3
 -15   4  -7 106.066 19.0451   2
 -15   4  -7 72.8687 19.9537   1
 -15  11   7 161.650 24.0755   1
   4 -15   7 105.046 18.0535   3
  15  -4   7 97.9577 15.2266   3
 -11  15   7 91.6662 22.3452   3
  -4  15  -7 78.6740 18.5970   2
  -4 -11   7 60.0750 20.3387   1
  -4 -11   7 112.186 17.6350   3
 -15   7  -7 108.036 17.4845   2
   7   8  -7 79.8957 17.4282   2
 -15   7  -7 76.7544 20.7871   1
 -15   8   7 154.193 24.9443   1
   7 -15   7 94.2849 22.0894   3
 -15   8   7 112.009 22.0726   3
  -8  15   7 90.7000 21.7859   3
  15  -7   7 96.0272 16.5511   3
  -7  15  -7 119.670 16.3366   2
  15  -8  -7 103.577 20.3313   2
  -7  -8   7 161.262 20.8899   3
  10 -15   7 135.023 21.4385   3
 -15  10  -7 123.529 17.9420   2
 -15   5   7 172.010 27.1277   1
  10   5  -7 127.501 20.4077   2
 -15  10  -7 115.011 23.8902   1
 -15   5   7 198.322 28.6175   3
  -5  15   7 178.280 23.8066   3
 -10  -5   7 172.578 27.2838   1
  15 -10   7 177.417 22.9563   3
  15  -5  -7 137.549 20.8095   2
 -10  15  -7 95.6871 24.2095   1
 -10  -5   7 197.088 21.5330   3
  13 -15   7 18.1698 15.0255   3
 -15  13  -7 7.52984 19.1864   1
  15 -13   7 22.9902 14.9373   3
 -13  15  -7 5.52462 20.0993   1
 -16  10   7 310.198 30.0293   1
 -16   6  -7 184.995 29.8373   1
 -16  10   7 256.858 31.2378   3
   6  10  -7 233.685 24.4913   2
   6 -16   7 210.613 25.0972   3
 -16   6  -7 245.095 25.3499   2
 -10  16   7 236.032 31.3318   3
  -6  16  -7 179.733 21.4241   2
  -6 -10   7 279.058 23.5329   3
  16  -6   7 246.428 22.9159   3
  -6 -10   7 212.140 30.1454   1
   9 -16   7 110.645 19.5820   3
 -16   9  -7 100.217 22.2181   1
   9   7  -7 126.452 24.9102   2
 -16   7   7 129.731 29.3162   1
 -16   9  -7 101.161 17.6786   2
  -9  16  -7 98.1186 15.6073   2
  16  -9   7 113.233 17.6955   3
  16  -7  -7 147.130 26.3457   2
  -7  16   7 154.665 23.5787   3
  -9  -7   7 192.669 29.6204   1
  -9  16  -7 118.783 25.3076   1
  -1   0   8 451.775 28.5267   1
  -1   0   8 417.688 30.0344   3
   1  -1   8 473.924 30.3941   3
  -1   1  -8 468.863 27.9660   2
   0  -1  -8 422.686 27.8492   2
   1   0  -8 468.764 29.3003   2
   0   1   8 426.317 29.8908   3
   2   0   8 40.4609 15.0490   3
  -2   0  -8 48.9469 13.7349   2
   0   2  -8 64.0613 14.8470   2
  -2   2   8 61.9211 16.1194   3
   0  -2   8 54.7150 15.5309   1
   2  -2  -8 67.7917 15.4668   2
  -2   2   8 60.6834 14.0504   1
   0  -2   8 29.8924 15.0278   3
   2   1  -8 113.415 16.4928   2
   2  -3   8 105.825 17.8888   3
  -3   2  -8 90.5160 15.5640   2
   1   2   8 115.297 17.7679   3
  -3   1   8 86.6139 17.3477   3
   1  -3  -8 103.678 15.8277   2
  -2  -1   8 101.967 17.5293   3
  -1   3   8 116.000 18.5401   3
  -1  -2  -8 108.146 15.6798   2
  -2  -1   8 109.051 17.7149   1
  -2   3  -8 84.9102 15.6523   2
   3  -1  -8 91.0158 16.4589   2
   3  -2   8 130.217 18.5281   3
   1   3  -8 85.6815 15.6979   2
   1  -4   8 112.963 19.4222   1
   3  -4  -8 86.3128 20.1620   2
  -4   3   8 132.016 19.6449   3
  -4   1  -8 111.668 16.7467   2
  -4   1  -8 88.7833 15.3706   1
   1  -4   8 82.8813 16.6739   3
   3   1   8 102.593 17.3134   3
  -4   3   8 115.423 16.6085   1
  -3   4   8 132.258 19.4706   3
  -3  -1  -8 97.8923 16.3616   2
  -3  -1  -8 125.155 18.4920   1
   4  -3  -8 113.392 17.0451   2
  -1   4  -8 121.781 17.1386   2
  -3   4   8 117.528 18.2650   1
  -1  -3   8 92.8174 17.5446   3
   4  -1   8 85.9674 16.3170   3
  -1  -3   8 96.9005 20.8551   1
   4   0  -8 38.2393 14.9050   2
  -4   4  -8 57.5697 13.9738   2
   0  -4  -8 40.2427 14.4203   2
   4  -4   8 33.5064 14.4333   3
   0   4   8 40.7272 15.2092   3
  -4   0   8 27.0805 14.9156   3
  -4   0   8 33.1349 15.2277   1
  -5   0  -8 25.1874 13.2563   2
  -5   5   8 78.7003 14.4755   1
  -5   5   8 76.1471 18.4446   3
   0  -5   8 55.7864 16.4781   1
   0   5  -8 44.2952 23.3243   2
   0  -5   8 65.1689 15.8819   3
   5   0   8 76.3922 15.3214   3
  -5   0  -8 62.3318 14.6226   1
   5  -5  -8 58.5023 15.4085   2
  -5   2   8 223.747 24.7380   3
   3  -5   8 194.700 22.7435   3
   2   3   8 200.369 22.4028   3
  -5   3  -8 202.551 22.6923   1
  -5   2   8 197.079 22.9603   1
   2  -5  -8 197.798 21.5007   2
  -5   3  -8 186.727 21.4000   2
   3   2  -8 203.041 22.4651   2
  -2  -3  -8 180.443 22.3771   2
  -3  -2   8 198.586 24.1164   3
   5  -2  -8 216.748 22.6804   2
   5  -3   8 193.120 21.9970   3
  -3  -2   8 197.394 28.6724   1
  -3   5  -8 184.066 21.1764   2
  -2   5   8 166.471 23.6389   3
   4  -6  -8 3.04648 12.3033   2
   2   4  -8 0.29076 24.3679   2
  -6   2  -8 -13.140 12.0104   2
  -6   4   8 18.9304 12.9618   1
   4   2   8 5.36711 13.3730   3
  -6   2  -8 8.10897 13.6083   1
  -6   4   8 20.9560 16.5848   3
   2  -6   8 12.3351 12.8334   3
  -2  -4   8 3.70925 14.7838   1
  -2   6  -8 12.7257 13.2945   2
  -4  -2  -8 2.18074 12.5182   2
  -2  -4   8 23.6045 14.5538   3
   6  -2   8 14.5924 12.5240   3
  -4   6   8 35.0264 16.4091   3
   6  -4  -8 8.03443 13.7953   2
  -6   5  -8 257.902 28.1440   1
   1  -6  -8 228.427 22.8216   2
   5  -6   8 210.053 23.4345   3
  -6   5  -8 274.279 23.7059   2
   1   5   8 229.629 23.9438   3
  -6   1   8 238.998 31.6404   1
   5   1  -8 247.564 23.8127   2
  -6   1   8 232.991 26.0005   3
   6  -1  -8 256.570 24.3261   2
  -5  -1   8 230.226 24.8153   3
   6  -5   8 243.744 23.8586   3
  -1   6   8 226.940 25.0158   3
  -5   6  -8 244.821 25.6026   2
  -5  -1   8 242.725 26.4585   1
  -1  -5  -8 293.312 23.4920   2
  -7   1  -8 122.010 20.5709   1
  -7   1  -8 130.790 17.2312   2
   6   1   8 138.728 19.8144   3
   1   6  -8 140.677 17.9858   2
  -7   6   8 135.092 20.7939   3
   1  -7   8 154.556 24.7455   1
  -7   6   8 144.369 19.1422   1
   6  -7  -8 124.098 17.9456   2
   1  -7   8 133.194 18.4510   3
  -1   7  -8 141.220 18.1668   2
  -1  -6   8 126.647 20.4777   1
   7  -6  -8 92.5098 16.6319   2
   7  -1   8 139.785 19.9930   3
  -6  -1  -8 131.028 17.9202   2
  -1  -6   8 158.545 22.2128   3
  -6   7   8 143.780 21.0577   3
  -6   7   8 150.585 19.2158   1
   3   4   8 383.854 27.2038   3
   3  -7  -8 350.676 25.3991   2
  -7   3   8 341.864 26.9753   1
  -7   4  -8 367.415 28.7598   1
   4  -7   8 320.334 27.0789   3
  -7   3   8 375.965 30.4326   3
  -7   4  -8 363.276 26.0427   2
  -4  -3   8 346.937 30.0987   1
  -4  -3   8 364.948 28.5041   3
  -3   7   8 333.491 29.3290   3
   7  -3  -8 390.598 27.5810   2
  -4   7  -8 390.769 26.4062   2
  -3  -4  -8 401.134 26.6361   2
   7  -4   8 356.103 26.9791   3
   0   7   8 23.3191 14.3140   3
   7  -7   8 42.5880 15.1166   3
   7   0  -8 17.2589 14.8050   2
  -7   0   8 26.8863 15.1195   1
  -7   7  -8 26.3292 16.9425   1
  -7   0   8 50.5597 17.1805   3
   0  -7  -8 22.0297 13.2791   2
  -7   7  -8 22.8992 13.7057   2
  -8   8   8 73.1607 19.2443   3
  -8   8   8 61.7380 13.8790   1
   8   0   8 42.1521 14.1209   3
  -8   0  -8 33.4601 14.1197   2
   8  -8  -8 56.8859 15.7892   2
   0  -8   8 43.4647 15.2493   3
   0   8  -8 22.5527 14.5160   2
   0  -8   8 38.1599 17.1786   1
  -8   3  -8 226.108 22.6716   2
   5   3   8 192.647 21.6714   3
   3  -8   8 169.755 23.0731   3
  -8   5   8 204.074 22.1810   1
  -8   5   8 185.773 26.1604   3
  -8   3  -8 197.512 23.9069   1
   3   5  -8 182.649 23.0655   2
   5  -8  -8 219.838 22.1282   2
   8  -5  -8 233.720 23.9392   2
  -5   8   8 185.631 25.7892   3
   8  -3   8 194.414 21.9548   3
  -3  -5   8 171.268 26.0746   1
  -3  -5   8 189.582 24.3638   3
  -3   8  -8 215.999 22.0548   2
  -5  -3  -8 163.724 21.8673   2
   6   2  -8 168.460 25.3640   2
  -8   2   8 170.044 23.5474   1
  -8   2   8 176.099 25.6041   3
   6  -8   8 185.100 22.9406   3
  -8   6  -8 182.886 26.0852   1
   2  -8  -8 160.282 22.1492   2
   2   6   8 213.011 22.5227   3
  -8   6  -8 207.086 22.5626   2
  -6   8  -8 213.479 22.2575   2
  -2  -6  -8 188.283 21.9422   2
  -6  -2   8 191.095 24.9348   1
  -6  -2   8 184.332 24.1481   3
  -2   8   8 145.175 21.1459   3
   8  -6   8 141.107 19.4656   3
   8  -2  -8 150.308 20.1154   2
  -9   7   8 62.1022 15.4491   1
   7  -9  -8 60.0992 15.1854   2
  -9   7   8 58.7716 19.0350   3
   2   7  -8 26.8707 14.9473   2
   7   2   8 44.2407 13.1216   3
  -9   2  -8 17.1101 15.3957   1
  -9   2  -8 22.1510 13.9756   2
   2  -9   8 24.5562 15.2623   3
   9  -2   8 41.8243 14.1190   3
  -2   9  -8 29.1618 14.5066   2
   9  -7  -8 62.4076 16.1437   2
  -2  -7   8 36.0962 17.1833   1
  -7  -2  -8 52.9444 15.1506   2
  -7   9   8 54.5957 18.3595   3
  -2  -7   8 51.8849 15.8912   3
  -9   4   8 475.063 31.7597   1
  -9   5  -8 422.566 31.7754   1
   5   4  -8 465.622 30.6523   2
   4  -9  -8 473.782 29.3855   2
   5  -9   8 430.461 30.8509   3
  -9   4   8 463.508 34.1646   3
   4   5   8 521.915 29.6615   3
  -4  -5  -8 454.355 29.8672   2
   9  -4  -8 483.917 31.3327   2
  -5  -4   8 452.157 34.7577   1
   9  -5   8 433.313 30.2248   3
  -4   9   8 485.265 33.5829   3
  -5  -4   8 474.413 32.2051   3
  -5   9  -8 444.459 29.1776   2
   1   8   8 56.8885 15.3945   3
  -9   1   8 34.3759 16.2376   1
   8   1  -8 37.1888 16.4600   2
   8  -9   8 21.2545 14.4079   3
  -9   8  -8 25.8957 13.8971   2
  -9   1   8 66.0891 18.0411   3
  -9   8  -8 12.8254 17.4524   1
  -1   9   8 38.6689 16.1762   3
  -8  -1   8 48.3314 16.5956   3
  -8   9  -8 38.4828 14.2595   2
  -8  -1   8 46.3326 16.6136   1
  -8   9  -8 23.9169 18.1634   1
   9  -8   8 23.6924 14.9495   3
   9  -1  -8 3.91358 15.6937   2
   9   1   8 20.7587 12.5982   3
 -10   1  -8 10.9538 14.0654   2
   1   9  -8 -2.2869 14.3461   2
 -10   9   8 20.8772 13.3132   1
 -10   1  -8 -14.862 14.3456   1
 -10   9   8 29.9392 18.1953   3
   1 -10   8 8.34995 14.2054   3
  -1  -9   8 21.6121 17.0461   1
  -9  10   8 27.2534 17.5632   3
  10  -1   8 4.26382 12.1096   3
  -9  -1  -8 10.7812 14.1262   2
  -1  -9   8 35.5098 14.5912   3
  -1  10  -8 -5.7168 13.4461   2
  10  -9  -8 22.5341 17.4671   2
 -10   6   8 242.350 29.1054   3
 -10   4  -8 215.597 23.7828   2
   4   6  -8 264.140 25.6732   2
   4 -10   8 227.298 25.4454   3
 -10   6   8 287.555 25.8796   1
   6   4   8 276.731 22.9016   3
  10  -4   8 208.443 23.3871   3
  -4  10  -8 212.950 23.6883   2
  10  -6  -8 243.998 25.5210   2
  -6  10   8 250.021 27.8800   3
  -6  -4  -8 254.676 24.4864   2
  -4  -6   8 251.997 29.8719   1
  -4  -6   8 280.641 25.8024   3
 -10   7  -8 20.2604 16.5919   1
   7 -10   8 31.9299 15.3841   3
   7   3  -8 25.6489 16.5346   2
 -10   3   8 22.7593 17.2410   3
 -10   7  -8 24.5282 14.0809   2
 -10   3   8 13.7463 15.2450   1
   3   7   8 37.2815 13.9721   3
  -3  10   8 7.86729 16.0540   3
  10  -3  -8 46.7871 17.0059   2
  -7  -3   8 21.1396 16.7643   1
  -7  -3   8 30.4790 16.0808   3
  -7  10  -8 28.4014 17.3961   1
  10  -7   8 29.2317 14.7456   3
  -7  10  -8 8.37803 13.7455   2
  10   0  -8 47.6949 17.3162   2
 -10  10  -8 34.5841 19.5794   1
   0  10   8 72.7039 16.5180   3
  10 -10   8 33.7119 15.7960   3
 -10   0   8 57.7024 17.4571   3
 -10  10  -8 31.3115 14.4361   2
 -10   0   8 67.9823 18.8545   1
 -11  11   8 14.1860 18.3119   3
   0 -11   8 24.9117 18.8713   1
   0  11  -8 47.9558 16.6612   2
  11   0   8 37.6590 13.0173   3
 -11  11   8 62.3485 14.0630   1
   0 -11   8 32.7992 15.5619   3
   8   3   8 20.3089 12.2435   3
 -11   8   8 54.8505 15.6239   1
   3 -11   8 17.8248 15.1131   3
 -11   3  -8 13.7038 18.1009   1
 -11   3  -8 33.9342 14.6215   2
 -11   8   8 33.6202 18.2648   3
   3   8  -8 20.3834 15.5081   2
  -3  -8   8 25.7913 17.1060   1
  -8  -3  -8 14.8010 14.5463   2
  11  -8  -8 19.1609 14.8498   2
  -8  11   8 33.2413 18.2742   3
  -3  -8   8 30.0359 14.0398   3
  11  -3   8 36.8818 13.6262   3
  -3  11  -8 2.58938 13.3608   2
   5   6   8 763.218 36.7003   3
 -11   6  -8 698.879 37.6565   2
   6   5  -8 749.469 39.0456   2
 -11   5   8 699.181 40.1901   1
   6 -11   8 632.560 39.1819   3
 -11   5   8 717.464 42.4970   3
 -11   6  -8 673.626 41.1669   1
  11  -5  -8 785.953 39.8181   2
  -6  11  -8 689.591 36.5746   2
  11  -6   8 682.460 38.4483   3
  -6  -5   8 739.098 39.2911   3
  -6  -5   8 685.149 43.3673   1
  -5  11   8 677.260 41.1651   3
 -11   2   8 116.319 20.8039   3
   9 -11   8 76.4423 18.6033   3
   9   2  -8 93.8736 18.8913   2
 -11   2   8 132.967 21.2562   1
 -11   9  -8 82.6101 16.5531   2
   2   9   8 154.160 21.0934   3
 -11   9  -8 96.0065 21.2290   1
  -9  -2   8 166.210 23.5788   3
  11  -2  -8 106.368 22.3733   2
  11  -9   8 96.5107 18.3584   3
  -9  -2   8 106.125 20.2317   1
  -2  11   8 124.062 20.5813   3
  -9  11  -8 93.0227 16.9162   2
  -9  11  -8 98.8975 22.4487   1
 -12   2  -8 62.0372 16.8929   2
 -12  10   8 37.4483 19.2983   3
 -12  10   8 70.1563 15.4567   1
   2 -12   8 69.7196 18.5989   3
  10   2   8 56.6158 13.2741   3
 -12   2  -8 22.5909 17.0291   1
   2  10  -8 26.1291 17.2372   2
  -2 -10   8 38.6492 18.3309   1
  -2 -10   8 39.9492 15.2952   3
  12  -2   8 71.0727 15.0241   3
 -10  12   8 28.5838 19.0361   3
 -12   5  -8 117.785 18.0618   2
   5   7  -8 116.382 18.8571   2
 -12   5  -8 94.1973 20.0493   1
   5 -12   8 106.039 19.5763   3
 -12   7   8 92.5923 21.0176   3
 -12   7   8 137.704 23.1626   1
  -7  12   8 108.472 20.9755   3
  12  -7  -8 136.269 19.7061   2
  -5  12  -8 87.5152 16.6941   2
  12  -5   8 109.673 17.8843   3
  -5  -7   8 155.162 22.5349   3
  -5  -7   8 137.097 28.0653   1
 -12   4   8 77.5996 18.2340   1
   4   8   8 67.7073 13.8785   3
 -12   8  -8 48.1516 14.9823   2
 -12   4   8 83.2972 19.7090   3
 -12   8  -8 33.3884 18.3334   1
   8   4  -8 54.3161 17.3938   2
  12  -4  -8 36.8672 17.7282   2
  -8  12  -8 40.9793 20.2453   1
  -8  -4   8 50.0784 21.1196   1
  -4  12   8 46.3038 18.3324   3
  12  -8   8 60.9723 16.5093   3
  -8  12  -8 28.1081 14.5996   2
 -12   1   8 91.0509 18.5392   3
 -12   1   8 53.1553 22.1209   1
  11   1  -8 57.3444 18.0988   2
  11 -12   8 68.5802 17.2332   3
 -12  11  -8 50.8327 23.4066   1
 -12  11  -8 52.4218 15.0461   2
  -1  12   8 83.0247 17.2083   3
 -11  12  -8 54.4947 17.7191   2
 -11  -1   8 77.5055 17.1961   3
  12 -11   8 67.5123 16.4717   3
 -11  12  -8 35.0652 24.7224   1
  12  -1  -8 53.2045 18.0185   2
 -11  -1   8 81.0412 19.6194   1
   9   4   8 143.578 17.2217   3
 -13   4  -8 83.9947 17.4346   2
 -13   4  -8 55.6506 19.0975   1
 -13   9   8 98.0874 22.0411   3
   4 -13   8 99.2162 19.3930   3
  -4  -9   8 87.3750 20.8593   1
  -4  13  -8 86.1312 16.8779   2
  -9  13   8 76.0156 20.6288   3
  -4  -9   8 90.5182 16.7911   3
  13  -4   8 84.1024 15.9829   3
 -13   7  -8 163.972 20.5664   2
   7   6  -8 157.838 20.7784   2
 -13   7  -8 111.363 22.2129   1
   7 -13   8 141.828 21.3571   3
 -13   6   8 199.004 40.8137   3
  -7  -6   8 205.057 23.2489   3
  -7  -6   8 172.238 28.9514   1
  13  -6  -8 242.573 31.5635   2
  -7  13  -8 119.158 23.6639   1
  -6  13   8 188.632 26.9512   3
  13  -7   8 148.281 21.6767   3
 -13  10  -8 25.3526 14.3791   2
 -13   3   8 54.8807 29.5897   1
 -13  10  -8 31.6611 19.9417   1
  10   3  -8 95.3855 19.4451   2
  10 -13   8 67.0516 17.6077   3
  13 -10   8 43.2156 15.9393   3
 -10  13  -8 40.3664 21.1320   1
 -10  -3   8 46.2372 18.1471   1
  13  -3  -8 80.7214 20.0804   2
  -3  13   8 90.4798 19.5594   3
 -10  13  -8 29.0047 15.1724   2
 -10  -3   8 78.3135 16.2089   3
   0   0   9 356.075 29.1811   3
   0   0  -9 346.242 27.3507   2
  -2   1   9 31.5725 14.9073   1
  -2   1   9 56.5668 17.1894   3
   1   1  -9 36.3817 15.6857   2
   1  -2   9 65.5406 17.5316   3
  -2   1  -9 24.4847 14.3284   2
   1   1   9 47.2821 16.3840   3
   1  -2  -9 40.8687 15.4757   2
  -1  -1   9 46.7962 17.3038   3
  -1   2  -9 39.9714 15.4092   2
  -1  -1   9 48.7387 16.4848   1
   2  -1  -9 35.3388 15.9700   2
   2  -1   9 53.9860 16.8934   3
  -1   2   9 66.6331 17.5359   3
  -1  -1  -9 18.3602 14.5266   2
   3  -3  -9 367.515 28.1161   2
  -3   0  -9 372.367 28.1755   2
  -3   3   9 355.254 30.1678   3
  -3   0  -9 350.637 26.2551   1
   0  -3   9 356.415 30.0017   3
   0   3  -9 387.757 28.4783   2
   3   0   9 345.928 29.1901   3
  -3   3   9 385.612 27.0000   1
  -3   0   9 69.3479 17.9813   3
   0   3   9 73.3240 17.8521   3
  -3   0   9 86.5114 18.3720   1
   3   0  -9 46.9344 17.0844   2
   0  -3  -9 67.6007 16.1813   2
   3  -3   9 88.7206 17.9506   3
  -3   3  -9 59.6790 18.2342   2
   2   2   9 40.3832 15.7297   3
  -4   2   9 33.4404 17.0797   3
   2  -4  -9 45.0656 15.2610   2
  -4   2  -9 26.1241 14.1927   1
   2  -4   9 34.6686 15.5490   3
   2   2  -9 6.64148 14.9194   2
  -4   2  -9 21.7367 15.2156   2
  -2  -2  -9 24.2613 14.4222   2
   4  -2   9 23.9397 14.4666   3
  -2   4  -9 33.0014 15.3209   2
  -2  -2   9 33.7820 16.6454   3
  -2   4   9 50.5276 17.0116   3
   4  -2  -9 29.8353 16.5172   2
  -2  -2   9 16.0139 15.2749   1
   4   1   9 92.9330 18.0506   3
  -5   4   9 93.4105 19.1468   3
  -5   1  -9 86.4263 17.4420   1
   1  -5   9 86.8242 18.3493   3
  -5   4   9 146.717 22.2689   1
  -5   1  -9 82.1468 16.9704   2
   4  -5  -9 95.9810 16.9204   2
  -1   5  -9 49.1262 16.2306   2
   5  -1   9 80.5305 17.3523   3
  -4  -1  -9 87.7472 16.7898   2
  -1  -4   9 71.7231 17.3862   3
  -4   5   9 77.2024 18.7406   3
   5  -4  -9 95.5659 18.3551   2
  -1  -4   9 60.9718 18.5437   1
  -4   5   9 88.3394 15.1482   1
  -5   4  -9 587.686 34.3199   2
   1  -5  -9 520.846 34.5511   2
  -5   1   9 550.984 36.5598   3
   1   4   9 638.874 35.9843   3
   4  -5   9 590.579 35.4864   3
   4   1  -9 615.953 35.5095   2
  -5   1   9 587.038 36.2364   1
   5  -4   9 536.033 34.6778   3
  -1  -4  -9 607.611 34.7697   2
  -4  -1   9 634.251 38.4033   1
   5  -1  -9 609.598 35.4137   2
  -4  -1   9 580.573 36.8665   3
  -4   5  -9 534.097 33.6699   2
  -1   5   9 547.646 35.8690   3
   0  -6   9 294.756 31.3200   1
   6   0   9 311.962 26.4966   3
   0   6  -9 335.767 28.3781   2
  -6   0  -9 302.183 25.4684   1
   6  -6  -9 351.999 29.0537   2
  -6   6   9 275.545 29.7928   3
  -6   6   9 381.381 26.4895   1
   0  -6   9 290.159 27.7722   3
  -6   0  -9 356.836 27.5554   2
  -6   3  -9 48.4754 17.1861   2
   3  -6  -9 65.5484 16.3095   2
  -6   3   9 92.0163 18.1753   1
   3   3   9 71.2931 17.4534   3
   3  -6   9 60.8082 16.5494   3
   3   3  -9 47.9857 17.3241   2
  -6   3  -9 81.5796 17.5724   1
  -3  -3  -9 46.1791 15.8290   2
  -3  -3   9 55.7986 18.1627   3
   6  -3  -9 66.5873 17.3286   2
  -3   6   9 62.2453 17.4639   3
  -3  -3   9 124.015 20.9826   1
  -3   6  -9 50.0395 15.9086   2
   6  -3   9 72.3700 16.7844   3
  -6   0   9 558.758 36.7066   3
   0  -6  -9 566.244 35.0148   2
   6   0  -9 634.838 36.8698   2
  -6   0   9 601.422 38.0343   1
  -6   6  -9 550.312 34.0618   2
   0   6   9 566.726 35.7629   3
  -6   6  -9 583.307 38.3323   1
   6  -6   9 567.628 36.2400   3
   5   2   9 62.1532 15.7809   3
   2   5  -9 36.2753 16.4535   2
   2  -7   9 31.9000 15.5380   3
  -7   2  -9 35.5687 15.1446   2
  -7   2  -9 37.7980 15.8578   1
  -7   5   9 46.3691 18.1893   3
  -7   5   9 64.6494 16.3548   1
   5  -7  -9 43.2901 16.1006   2
  -5  -2  -9 48.3881 16.0055   2
  -5   7   9 34.5342 17.3958   3
  -2   7  -9 59.4674 16.4796   2
  -2  -5   9 65.8761 17.2120   3
   7  -5  -9 34.7759 16.3687   2
   7  -2   9 53.0020 15.4148   3
  -2  -5   9 50.6496 18.1342   1
  -7   2   9 55.3502 17.2541   1
   5  -7   9 48.5724 16.4249   3
   2   5   9 84.1664 17.0370   3
   5   2  -9 88.0536 18.6768   2
  -7   5  -9 35.1419 15.3206   2
  -7   2   9 64.4413 19.1595   3
  -7   5  -9 45.7927 17.9420   1
   7  -5   9 53.3644 16.4899   3
   7  -2  -9 44.5281 17.1487   2
  -5  -2   9 74.1186 19.4377   1
  -2  -5  -9 67.6024 16.0114   2
  -5   7  -9 64.8351 15.9679   2
  -2   7   9 77.9498 18.1187   3
  -5  -2   9 73.2561 18.1532   3
   7   1   9 139.608 20.1151   3
   1   7  -9 119.575 18.8303   2
  -8   7   9 115.616 21.4688   3
  -8   7   9 134.823 28.3674   1
  -8   1  -9 74.3079 17.9207   1
  -8   1  -9 98.7821 18.1511   2
  -7   8   9 98.2294 24.6601   3
  -1   8  -9 96.3214 18.4972   2
  -7  -1  -9 93.2428 17.7416   2
  -1  -7   9 162.958 33.6860   3
  -1  -7   9 114.171 22.7783   1
   8  -1   9 167.241 21.5433   3
  -8   4  -9 63.2564 17.5170   1
   4   4   9 143.527 21.3208   3
   4   4  -9 72.3110 18.3702   2
  -8   4  -9 82.2894 16.8713   2
  -8   4   9 136.724 22.1337   1
   8  -4  -9 81.2459 18.4380   2
  -4   8  -9 115.433 18.0575   2
  -4   8   9 105.934 20.0149   3
  -4  -4   9 111.145 19.3647   3
   8  -4   9 99.7920 17.7110   3
  -4  -4   9 83.9793 20.4149   1
  -4  -4  -9 107.415 17.9042   2
  -8   7  -9 52.7318 19.6396   1
  -8   1   9 80.3481 18.7804   1
   1   7   9 96.0583 17.9378   3
  -8   7  -9 54.5556 16.4497   2
   7  -8   9 67.4360 18.1702   3
   7   1  -9 93.7039 19.1032   2
  -1   8   9 103.818 18.3457   3
  -7  -1   9 85.6817 19.9014   1
  -7  -1   9 68.8597 22.0055   3
  -7   8  -9 56.4781 15.8112   2
   8  -1  -9 91.1588 19.5443   2
  -7   8  -9 40.6981 19.0558   1
   9   0   9 432.171 29.5847   3
   0  -9   9 359.975 31.1936   3
  -9   9   9 525.644 28.1709   1
  -9   3  -9 56.2191 15.9487   2
  -9   6   9 56.9129 19.4681   3
   3   6  -9 12.9351 16.4056   2
  -9   6   9 56.5353 15.2717   1
   3  -9   9 43.5782 16.3244   3
  -9   3  -9 22.7130 17.3629   1
   6   3   9 32.1712 13.3356   3
  -6   9   9 66.6112 22.4302   3
  -6  -3  -9 40.4740 28.2226   2
   9  -3   9 61.6932 15.2222   3
  -3   9  -9 53.8693 16.9166   2
   9  -6  -9 41.8876 15.9617   2
  -9   6  -9 106.140 20.1551   1
   3   6   9 146.391 21.0783   3
  -9   3   9 175.043 24.1116   1
  -9   3   9 132.415 22.0540   3
   6  -9   9 100.375 19.8468   3
   6   3  -9 105.243 19.6978   2
  -9   6  -9 109.388 17.8873   2
  -6  -3   9 147.855 23.6261   1
  -6   9  -9 175.159 27.5045   1
  -6   9  -9 119.485 18.2875   2
  -3   9   9 176.810 25.2646   3
   9  -6   9 147.837 32.7289   3
   9  -3  -9 80.6943 18.8085   2
  -6  -3   9 166.625 27.8830   3
   9  -9   9 84.3237 18.8648   3
  -9   9  -9 88.2167 22.3410   1
   5   5   9 170.861 20.3145   3
 -10   5   9 116.892 21.7559   3
 -10   5  -9 79.3029 20.1073   1
 -10   5   9 148.128 22.6292   1
   5 -10   9 136.004 21.1683   3
 -10   5  -9 93.2764 17.9395   2
   5   5  -9 68.0442 18.3707   2
  -5  10  -9 116.249 29.3417   2
  -5  -5   9 107.497 22.2306   1
  -5  10   9 116.741 21.9288   3
  10  -5  -9 116.304 20.4869   2
  10  -5   9 114.100 29.9037   3
   1   0  10 47.7278 18.1837   3
   1  -1 -10 113.117 24.9123   2
  -1   0 -10 82.5595 18.0339   2
  -1   1  10 95.3625 19.5432   3
   0  -1  10 63.3797 18.7113   3
   0   1 -10 82.5302 17.5465   2
   2  -2  10 128.649 20.6283   3
   0  -2 -10 170.304 21.0790   2
   0   2  10 202.860 25.1019   3
   2   0 -10 150.951 20.2588   2
  -2   2 -10 140.756 19.8410   2
  -2   0  10 226.068 26.7118   3
   2   1  10 68.5082 17.5288   3
   2  -3 -10 14.8325 15.1485   2
   1   2 -10 43.9344 16.2764   2
  -3   1 -10 23.2148 16.1796   2
   1  -3  10 40.1408 16.2914   3
  -3   1 -10 61.7666 15.9287   1
  -3   2  10 19.9810 16.4017   3
  -3   2  10 38.6611 15.9882   1
  -2  -1 -10 54.8697 14.4896   1
  -1   3 -10 11.8060 14.9529   2
  -2   3  10 51.6297 17.8876   3
   3  -1  10 42.6991 15.8641   3
   3  -2 -10 15.4933 18.9909   2
  -1  -2  10 35.5338 17.9915   3
  -2  -1 -10 26.7069 15.4834   2
   0   0   0    0.00    0.00   0
;
_shelx_hkl_checksum   28968
